# Supplementary material for: PGAM5 promotes lasting FoxO activation after developmental mitochondrial stress and extends lifespan in Drosophila
Source: eLife. 2017 Sep 11;6:e26952. doi: 10.7554/eLife.26952 (PMC5614561; doi:10.7554/eLife.26952)
Supplement: Figure 1—source data 1. [file elife-26952-fig1-data1.xlsx]

## Sheet: Figure 1
	Figure 1C	DaGS x					Figure 1D	DaGS x w	DaGS x dOTC
		dOTC, -RU	dOTC, +RU	dOTC, heat shock	Hrd1 RNAi			+RU	-RU	+RU	bsk RNAi, +RU	FoxO RNAi, +RU	Rel RNAi, +RU	jun RNAi, +RU	kayak RNAi, +RU
	Mtk	0.26	4.78	1.19	1.2			0.271	0.974	1.657	0.395	0.107	0.218	1.092	1.765
		0.22	0.19	0.23	0.98			0.737	0.592	2.258	0.362	0.096	0.325	1.019	1.588
		1.22	3.02	0.41	0.84			0.546	0.649	1.802	0.362	0.144	0.306	1.092	1.195
		1.1							0.308	1.332	0.422	0.015	0.165
		0.96								1.028	0.376	0.057	0.239
											0.141	0.034
	Drs	0.07	0.06	0.21	0.17											Note partial overlap since initial screen included multiple RNAis
		0.14	0.73	0.3	0.15				DaGS x dOTC
		0.14	1.78	0.06	0.12				-RU	+RU	ASK1 RNAi, +RU	PGAM5 RNAi, +RU	PGAM5 null, +RU
		0.2							0.355	1.441	0.034	0.029	0.028
		0.44							0.424	1.63	0.055	0.035	0.009
									0.974	1.748	0.175	0.19	0.058
	TotA	0.05	0.42	0.37	0.1				0.592	1.657	0.071	0.305
		1.24	0.2	0.64	0.06				0.649	2.258	0.777	0.158
		0.25	6.16	0.55	0.08				0.308	1.802	0.569	0.117
		0.53								0.793
		0.08								0.985
										0.674
	Rel	0.07	0.1	0.07	0.05					0.995
		0.04	0.12	0.07	0.04					0.92
		0.01	0.17	0.03	0.04					0.503
		0.04
		0.07
