# Supplementary material for: PGAM5 promotes lasting FoxO activation after developmental mitochondrial stress and extends lifespan in Drosophila
Source: eLife. 2017 Sep 11;6:e26952. doi: 10.7554/eLife.26952 (PMC5614561; doi:10.7554/eLife.26952)
Supplement: Figure 3—source data 1. [file elife-26952-fig3-data1.xlsx]

## Sheet: Figure 3
	Figure 3A	DaGS x dOTC						Figure 3B	DaGS x dOTC
		-RU	+RU	PGAM5 null, -RU	PGAM5 null, +RU				-RU	+RU	PGAM5 null, -RU	PGAM5 null, +RU
		3.72533	8.3754	7.18931	7.09998				13.6	15.3	13.8	7.7
		5.41397	6.94535	6.21427	2.39925				14.5	19.2	14	8.8
		4.14719	4.59426	4.08985	4.19208				12.6	17.9	5.6	12
		4.73054	3.58469	1.10981	2.26643					19.1	2.3	12.5
		4.66014	5.34684	1.90636	2.06123							13.5
		1.33847	1.40186	1.61676	2.01301
		1.60105	1.40836
		1.54658	1.28948
	Figure 3C	DaGS x dOTC				Figure 3D	DaGS x dOTC				Figure 3E	DaGS x dOTC
		-RU	+RU	PGAM5 null, -RU			-RU	+RU	PGAM5 null, -RU			L3, -RU	L3, +RU	L3, +RU +SP600125	adult, -RU	adult, +RU	adult, +RU +SP600125	-RU	+RU	bskDN, +RU	adult -RU	adult 24h RU	adult -RU 7d post	adult 24h RU 7d post
		0	100	33.8462			0	22.8571	2.91262			10.2041	75	2.7027	6.97674	64.8649	50	16.3265	92	4.7619	54.2857	72.7273	38.3721	0
		0	88.8889	10.5263			0	21.3675	0			69.4444	75	10.2564	0	80.6452	56.5217	0	62.5	34.7826	21.9048	83.3333	32.0755	1.81818
		3.22581	100	1.96078			11.4583	22.7273	0			36	95	23.0769	0	82.6087	34.6154	0	21.6667	0	16.6667	85.5072	0	26.6667
		3.84615	21.6216	34.0909			0	7.59494	0			54.1667	72.4138	21.4286	75	55.7377	25	22.3881	41.6667	27.5	54.7945	75	47.3684	43.5897
		0	84.9057	17.9487			0	16.4835	0.793651			35.7143	50	7.31707	0	73.4375	50	0	11.1111	38.4615	40	76.8293	4.16667	37.931
		35.2941	63.8889	2.7027			0	0.943396	14.9039			55.8824	81.8182	53.8462	35	52.0833	20.8333	17.8082	69.2308	36.8421	8.92857	90.2439	0	0
		0	56.6667	100			20.1183	21.2121	0			15.3846	60	88.2353	72.4138	76.7857	22.5806	20	62.5	17.284	33.3333	35.7143	0	0
		2.77778	100	34.6154			0	22.1239				84.375	70	41.3793	23.0769	75	30.7692	35.8696	51.1111	18.6046	0	85.7143	20.2128	29.3478
		35.1351	87.5	23.5294			8.33333	22.7848				51.7241	13.0435	37.5	50	70	17.0732	6.25	58.5366	37.2549	0	17.1717	24.2718	10.5263
		0	65.1163	0			2.54237	0				85.7143	90.4762	40.625	0	35.2941	33.3333	25.3731	26.2295	12.1622	8.47458	66.2338	8	0
		0	54.8387	55.8824				36.7816				20	53.3333	30	38.0282	78.5714	84.6154	33.8028	0	2.1978				25.7732
		0	0	0								16.6667	80.7692	36.8421	51.3513	68	48.5714	11.1111	67.9487	47.8873				8.98876
			100	0								50	100	34.2105	14.2857	62.6866	34.4828	12.1212	76.3889	3.0303
												8.51064	91.6667	23.8095	0	45.946	13.5593	7.14286	66.6667	61.2903
												0	67.7419	53.8462	48.8889	37.5	33.3333		13.7931	34.8837
												61.1111	69.2308	35	17.6471	51.7857	29.4118		63.6364	25
												0	48.6487	21.4286	25.4902		48.9796		59.5238	19.403
												2.5641	23.0769	19.3548	0		27.7778		28.5714	27.027
												25	85.7143	50	32.2034		46.1538		50	7.35294
												40.5405	75	0	0		13.1579		45.3333	10.1449
												93.5484	76.9231	11.7647			62.6506		70.4545
												25	23.0769	20			28.8889		77.027
													89.2857	73.5294			25.8065
													10	50
