# Supplementary material for: PGAM5 promotes lasting FoxO activation after developmental mitochondrial stress and extends lifespan in Drosophila
Source: eLife. 2017 Sep 11;6:e26952. doi: 10.7554/eLife.26952 (PMC5614561; doi:10.7554/eLife.26952)
Supplement: Figure 5—source data 1. [file elife-26952-fig5-data1.xlsx]

## Sheet: Figure 5
	Figure 5A	DaGS x dOTC							Figure 5B	DaGS x dOTC							Figure 5C	DaGS x dOTC		DaGS x UAS-TSC1+2
		Pre, -RU	Pre, +RU	Starved, -RU	Starved, +RU	Refed, -RU	Refed, +RU			Pre, -RU	Pre, +RU	Normal food, +RU	Sucrose, +RU	High-protein, +RU	High-protein, +RU & rapa			+RU	TSC1 RNAi, +RU	-RU	+RU
		15.4762	86	33.3333	53.9682	15.3846	41.8605			15.4762	86	63.4146	75	14.2857	66.6667			43.2432	0	0	12.963
		42.4242	75.5102	71.4286	58.7302	22.3881	75			42.4242	75.5102	8.57143	56.8421	29.7297	35.4167			48.0392	10.3448	0	12.069
		2.85714	63.6364	24.0964	30.1887	0	53.8462			2.85714	63.6364	97.6191	0.943396	36.5854	0			46.3918	0	3.57143	7.44681
		0	60.9375	46.1538	38.2979	2.83019	69.2308			0	60.9375	55.5556	73.3333	0	37.5			46	1.04167	0	19.0476
		18.1818	49.1228	61.9048	49.1803	34.4828	52.0548			18.1818	49.1228	65.3061	23.0769	0	1.63934			57.1429	0	7.40741	0
		40.9091	12.1212	13.7931	21.1765	13.0435	35.8974			40.9091	12.1212	22.449	64.2857	32	4.58716			70.4545	0	0	21.9178
		24.6154	66.6667	36		17.6471	65.2174			24.6154	66.6667	16.4179	56.25	3.7037	0			18.6992	0.483092	0	10.6195
		20	32.6923	48		0	82.0513			20	32.6923	74.0741	17.8571	6.52174	26.6667			50	55.914	0	0
		38.6364	70.3704	61.5385		37.8788	28.9474			38.6364	70.3704	35.1852		20	87.5			0	20	2.08333	20
		11.6279				1.72414	38.5965			11.6279		0		0	5.26316			49.2188	32.4675	0	28.125
		10				16.5217				10		63.5135		20	0			50	8.88889	13.1579	7.04225
		20.202				1.75439				20.202		56.7568		13.6364	30.9524			36.7089	9.56522	11.2676	67.3077
						0						41.4634		0	64.9123			16.9491	51.7857	18.4211	0
												51.282		0	87.0968			74.5098	11.4286	0	35.2941
												13.1579		0	46.7742			21.6216	2.94118	18.0328	38.0282
												73.5294		0	91.6667			71.4286	33.3333	33.3333	44.7368
	Figure 5D	DaGS x dOTC			DaGS x							45.4545		0	47.8261			43.3333	0	0	0
		-RU	+RU	UAS-GCN2 RNAi, +RU	dOTC, +RU	UAS-GCN2, -RU	UAS-GCN2, +RU					0		0	68.1159			71.4286	27.8846	6.12245	39.1892
		51.3513	64.8649	0	100	86.7925	83.3333					27.835		1.53846	23.0769					42.3077	68.8312
		14.2857	80.6452	1.62602	97.2222	78.0822	73.5294					50		0						4.83871	26.087
		0	82.6087	41.7323	100	22.0339	80					54.5455		0						0.793651	0
		48.8889	55.7377	0	100	39.4737	87.5					5.88235		0							65.1163
		17.6471	73.4375	50	59.0909	69.2308	97.0588					58.6207		21.0526							42.8571
		25.4902	52.0833	7.5	17.3913	75	0							32.4786							39.6226
		0	76.7857	6.59898	92.3077	75.6098	95.2381							0							0
		32.2034		79.6296	64.1026	26.4706	96.4286							14.8148							94.7368
		0		12	77.7778	12	64.7059							4.34783
					82.1429	20.6897	95.4545
					83.3333	60.8696	100		Figure 5E	DaGS x GCN2 RNAi
					100	44.4444	89.0625			-RU, -rapa	-RU, +rapa	+RU, -rapa	+RU, +rapa
						81.3953	66.6667			0	0	86.8421	90.9091
						60.6061	40			0	85.1852	65.8537	78.4615
						25.9259	54.5455			38	76	0	21.0884
						0	17.5			55.5556	82.6923	35.8974	68.6047
						35.7143	51.2195			8.33333	97.5904	58.8235	0
						0	80.7692			76.7857	95.8333	10.7143	14.9254
						12.5	94.7368			1.69491	93.5897	78.125	56.8965
						0	96.1539			64.4737	75	9.09091	36.1111
						0	100			0		55.4054	6.32911
						0	100			16.129		45.283	0
						0	37.1429			60.8696		15.625	24.1379
							73.913					31.8182	76.9231
												7.01754	64.4068
												44.0678	21.0526
