# Supplementary material for: PGAM5 promotes lasting FoxO activation after developmental mitochondrial stress and extends lifespan in Drosophila
Source: eLife journal article supplement (doi:10.7554/elife.26952), 2017-09-11

A

Adult NAD levels

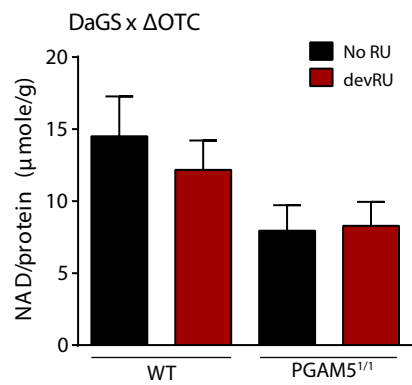

B

DaG x  $\Delta$ OTC, L3 larvae +RU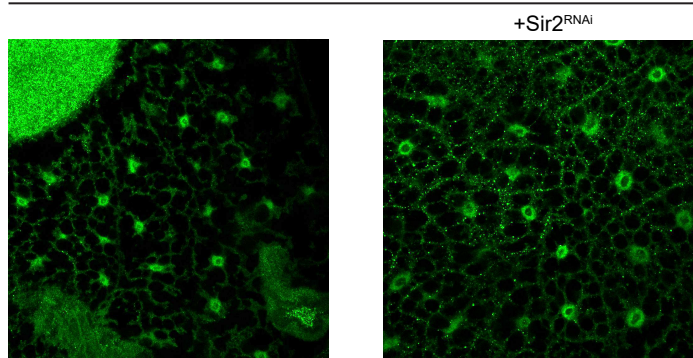

C

DaG x UAS-Sir2, L3 larvae +RU

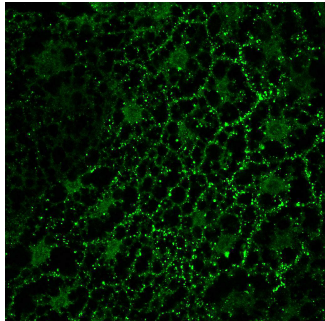

D

DaG x yw, L3 larvae +RU,  
0.2% w/v nicotinamide riboside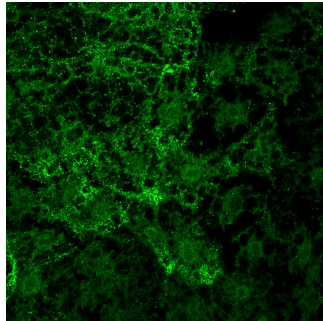

E

DaG x  $\Delta$ OTC/HDAC4<sup>RNAi</sup>, adult, Dev. RU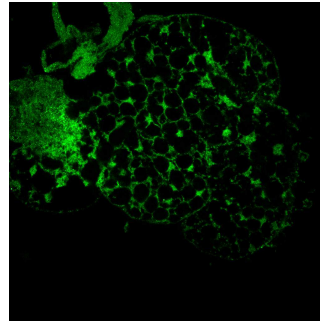

Supplement: supp [file elife_poa_e26952_Figure_5_Supplement_1.pdf › elife_poa_e26952_Figure_5_Supplement_1.pdf]
