# Supplementary material for: PGAM5 promotes lasting FoxO activation after developmental mitochondrial stress and extends lifespan in Drosophila
Source: eLife. 2017 Sep 11;6:e26952. doi: 10.7554/eLife.26952 (PMC5614561; doi:10.7554/eLife.26952)
Supplement: Supplementary file 1. [file elife-26952-supp1.xlsx]

## Sheet: Acute adult mtUPR (Fig1)
			Adult thorax, 24h RU486
	tracking_id	gene_short_name	FPKM tubGS X delta OTC	FPKM tubGS x ND75 RNAi	FPKM tubGS x w1118
	FBgn0031208	CG11023	0	0.202793	0.111191
	FBgn0002121	l(2)gl	20.2744	12.8215	16.4585
	FBgn0031209	Ir21a	0	0	0
	FBgn0263584	CR43609	0.285179	0.643666	0.264734
	FBgn0051973	Cda5	12.536	26.8061	14.5399
	FBgn0067779	dbr	12.7158	8.2194	10.033
	FBgn0031213	galectin	68.4088	48.6359	46.3401
	FBgn0031214	CG11374	0.808543	1.09408	0.449791
	FBgn0002931	net	11.801	7.55204	7.29485
	FBgn0031216	CG11376	9.15112	5.8004	6.68263
	FBgn0031217	CG11377	7.61017	5.38444	6.16051
	FBgn0026787	Nhe1	7.65227	5.29374	6.64696
	FBgn0005278	Sam-S	97.3889	74.9993	87.0188
	FBgn0031228	CG11455	751.081	813.193	713.435
	FBgn0031229	CG3436	13.2413	12.7092	16.0364
	FBgn0031227	CG3709	1.53502	0.865815	2.96688
	FBgn0031219	CG13694	0	0.345623	1.3258
	FBgn0031220	CG4822	28.613	15.0108	15.6899
	FBgn0025683	CG3164	157.892	125.458	129.837
	FBgn0001142	Gs1	59.4118	50.1802	56.172
	FBgn0051975	CG31975	0.33528	0	0.465355
	FBgn0051974	CG31974	15.6187	17.0436	24.6728
	FBgn0031224	CG11454	15.5919	11.8538	12.987
	FBgn0259818	CG42399	1.0342	0.779075	0.641091
	FBgn0053635	CG33635	7.78004	4.37796	2.99655
	FBgn0016977	spen	11.8126	8.76907	8.28536
	FBgn0031231	mRpL10	18.3183	16.1456	17.6885
	FBgn0031233	CG11490	7.38955	6.8025	7.32869
	FBgn0031232	CG11617	62.2194	39.5073	33.774
	FBgn0086902	kis	18.5175	15.3743	17.4179
	FBgn0031235	CG13693	0.525001	0	0
	FBgn0263465	snoRNA:kis-a	0	0	0
	FBgn0262252	mir-965	0	0	0
	FBgn0022246	Rpp30	2.42245	1.63739	2.6912
	FBgn0031238	CG3645	4.72255	4.62654	5.99589
	FBgn0031239	CG17075	1.43906	1.05171	0.947996
	FBgn0031240	CG3345	0	0.147581	0
	FBgn0086912	mbm	5.19665	2.93128	5.96953
	FBgn0086856	CG11555	12.6005	9.18959	8.74184
	FBgn0086855	CG17078	4.23913	2.90397	4.02793
	FBgn0003444	smo	2.66089	1.56002	2.51968
	FBgn0031244	CG11601	8.25172	7.97228	6.73556
	FBgn0031245	CG3625	51.9866	36.5033	52.8958
	FBgn0025686	CG11592	5.04795	5.03736	5.28326
	FBgn0031247	CG11562	10.7456	10.2025	6.20684
	FBgn0017457	U2af38	7.1555	8.17016	6.79801
	FBgn0024352	Hop	16.6908	12.516	19.2169
	FBgn0020622	Pi3K21B	4.35692	4.0344	4.85671
	FBgn0004611	Plc21C	13.7186	12.9163	12.6118
	FBgn0264086	CG43755	0.254182	0.215056	0.353729
	FBgn0263872	CR43719	0	0	0
	FBgn0031248	CG11912	0.801863	0.45153	53.1772
	FBgn0031249	CG11911	1.21723	2.46823	346.173
	FBgn0053127	CG33127	0.474546	0.80194	61.9507
	FBgn0051921	CG31921	0	0.146995	0.16123
	FBgn0031250	Ent1	21.8408	13.1177	14.7054
	FBgn0000061	al	0.478354	0.607138	0.110965
	FBgn0263871	CR43718	0	1.1421	0
	FBgn0031251	CG4213	207.008	90.0446	94.4271
	FBgn0003278	RpI135	3.83575	2.06692	2.96934
	FBgn0263350	alpha-Adaptin	30.4816	30.444	26.473
	FBgn0263933	ebi	8.50813	8.20323	6.6916
	FBgn0031252	CG13690	0.186053	0	0.51727
	FBgn0002593	RpLP1	1032.29	1077.2	1649.82
	FBgn0031253	CG11885	8.99601	9.26125	8.74936
	FBgn0031254	CG13692	0	0.660046	0.361264
	FBgn0031255	BBS8	0.1266	0.214226	0.23491
	FBgn0004583	ex	7.33597	5.71697	5.94845
	FBgn0015924	crq	53.3221	28.872	26.999
	FBgn0263870	CR43717	0	0	0
	FBgn0031256	CG4164	14.6061	12.1666	14.302
	FBgn0262510	CR43080	8.42507	5.37833	4.27656
	FBgn0031257	CG4133	1.70329	1.34908	1.44979
	FBgn0031258	CG4297	1.9342	2.06461	2.17363
	FBgn0027592	MED15	4.28737	3.83488	3.53037
	FBgn0003963	ush	4.18774	2.12988	3.32257
	FBgn0043364	cbt	91.0439	49.9219	65.7589
	FBgn0010602	lwr	39.1097	29.5037	38.6479
	FBgn0031260	Spp	34.7249	27.0554	28.7409
	FBgn0031261	nAcRbeta-21C	83.0983	46.6194	64.4261
	FBgn0005660	Ets21C	11.9575	7.21232	0.727107
	FBgn0260933	rempA	0.768044	0.547788	0.413193
	FBgn0031263	CG2789	78.7237	50.4912	90.9968
	FBgn0031264	CG11835	16.3168	20.0684	15.0092
	FBgn0031265	CG2794	2.37947	2.32392	3.22858
	FBgn0021874	Nle	6.22211	2.3394	5.38666
	FBgn0031266	CG2807	9.74508	10.5879	10.8379
	FBgn0031267	Ipk2	8.27057	3.72946	4.25835
	FBgn0031268	cold	12.2529	7.49937	12.3284
	FBgn0013323	Ptth	0.459027	0	0.637588
	FBgn0023489	Pph13	0	0	0
	FBgn0010323	Gsc	0	0	0
	FBgn0031270	CG13689	3.77762	1.91193	1.3954
	FBgn0263657	CR43648	0	0	0
	FBgn0263658	CR43649	0	0	0
	FBgn0040106	lectin-21Cb	0	0	0
	FBgn0040107	lectin-21Ca	0	0	0
	FBgn0031273	CG2839	0	0	0
	FBgn0000497	ds	1.87818	3.1552	2.02965
	FBgn0011244	Hsp60B	0	0	0
	FBgn0026438	Eaat2	20.612	17.8682	17.5745
	FBgn0031275	GABA-B-R3	0.776539	1.49124	0.590202
	FBgn0031276	CG12506	0	3.21687	0
	FBgn0040725	CG13946	0	3.38227	0.922062
	FBgn0031277	CG13947	461.289	536.688	349.283
	FBgn0041250	Gr21a	0	0	0
	FBgn0031279	CG3544	0	0	0.10983
	FBgn0000442	Pkg21D	0.974335	0.962281	1.0555
	FBgn0051658	Nnf1b	0.633701	0	0.585861
	FBgn0086130	KH1	4.13252	3.39054	3.71793
	FBgn0031281	Saf6	3.13965	1.47647	3.15791
	FBgn0031282	Pex12	1.79215	4.92705	4.14925
	FBgn0031283	CG15880	0	0	0.248007
	FBgn0031284	CG3876	4.23229	4.12995	2.8675
	FBgn0015621	Clp	2.35839	1.84068	3.19466
	FBgn0031285	CG3662	208.253	194.843	180.165
	FBgn0031286	CG3862	9.32201	5.58055	6.51773
	FBgn0010583	dock	7.17463	6.53016	9.41787
	FBgn0020304	drongo	69.9759	46.2772	48.4737
	FBgn0031287	CG4291	6.29598	6.88878	4.63357
	FBgn0020545	kraken	42.4168	27.5477	42.3099
	FBgn0031288	CG13949	0	0	0
	FBgn0262177	mir-375	0	0	0
	FBgn0031289	CG13950	1.07948	1.45976	0.999854
	FBgn0029095	aru	15.7668	14.7699	14.3815
	FBgn0086031	snoRNA:Me28S-U1230	0	0	0
	FBgn0020305	dbe	6.34395	2.92541	8.55063
	FBgn0053526	PNUTS	55.2276	56.1741	50.5326
	FBgn0002936	ninaA	0	0	0
	FBgn0031292	CG15824	0.033305	0	0
	FBgn0002563	Lsp1beta	0.402316	0.136232	4.25875
	FBgn0003916	snRNA:U1:21D	74.8799	35.9056	52.6391
	FBgn0046113	GluRIIC	1.24494	0.936927	0.835066
	FBgn0028481	CG4341	3.29383	2.99757	2.64922
	FBgn0031294	IA-2	35.6711	46.2076	46.5163
	FBgn0031295	CG4375	0	0	0
	FBgn0031296	CG4415	0.16305	0	0
	FBgn0003310	S	7.07359	3.183	6.68669
	FBgn0015905	ast	3.72893	1.54623	2.12009
	FBgn0031298	Atg4	29.1754	23.4702	27.7447
	FBgn0031299	CG4629	10.3176	7.7774	9.35769
	FBgn0261938	mtRNApol	14.7162	13.6937	13.8849
	FBgn0031301	CG14339	0.31662	0.321706	0
	FBgn0031302	CG14340	0.906408	0	0
	FBgn0016926	Pino	139.425	112.873	126.885
	FBgn0031304	CG4552	22.3743	17.172	18.6203
	FBgn0031305	Iris	44.711	35.8615	47.8493
	FBgn0031306	CG4577	25.9075	24.736	26.1698
	FBgn0031307	MFS3	0.737087	1.06936	0.977308
	FBgn0031308	CG4749	3.75527	2.26926	4.60324
	FBgn0031309	Tfb4	3.52504	1.58858	3.48145
	FBgn0031310	CG4764	15.0402	11.9143	17.6248
	FBgn0261458	capt	92.2516	39.159	41.9373
	FBgn0264267	CR43767	0	0	0
	FBgn0031312	Tango14	6.90934	5.69249	8.70322
	FBgn0031313	CG5080	44.9409	50.4686	46.1776
	FBgn0031314	CG4785	2.78782	1.13239	2.27671
	FBgn0031315	CG14341	15.8609	8.23049	6.00582
	FBgn0024314	Plap	7.5231	7.94365	10.3657
	FBgn0051922	CG31922	4.70393	2.96849	4.32718
	FBgn0031317	CG5118	17.2733	4.8719	7.23467
	FBgn0031318	CG4887	12.3429	10.5009	13.3652
	FBgn0031319	CG4896	6.131	5.69216	5.81706
	FBgn0031320	CG5126	6.00542	3.75538	5.329
	FBgn0031321	Tgt	2.98991	1.68614	3.16929
	FBgn0031322	CG5001	41.0575	26.6587	26.2192
	FBgn0031323	CG5139	0	0	0
	FBgn0263080	CG43348	1.44036	0	11.7409
	FBgn0263081	CG43349	0.920751	3.08648	98.4977
	FBgn0040723	CG5011	2.80484	1.17843	29.6108
	FBgn0031324	CG14342	0.320468	0	0
	FBgn0262944	CR43263	0	0	0
	FBgn0259229	CG42329	3.17612	2.76122	15.7807
	FBgn0031327	CG5397	20.4142	12.6123	10.8953
	FBgn0041097	robo3	2.24802	1.74798	1.5069
	FBgn0011294	a5	0	0	0
	FBgn0031331	CG5440	0	0	0
	FBgn0053923	CG33923	0	0	0
	FBgn0053922	CG33922	0	0	0
	FBgn0026141	Cdlc2	0	0	0
	FBgn0031332	CG5556	0	0	0
	FBgn0031333	CG5561	0	0	0
	FBgn0051924	CG31924	0	0	0
	FBgn0031335	CG5565	0	0	0
	FBgn0051659	CG31659	1.25644	1.99786	0
	FBgn0053126	NLaz	182.593	180.312	90.3007
	FBgn0031337	CG14346	0	0	0
	FBgn0002543	lea	1.62692	1.43318	1.69349
	FBgn0263320	CG43401	0	0	0
	FBgn0003926	snRNA:U3:22A	0	0	0
	FBgn0263321	CG43402	42.6803	34.0336	11.8488
	FBgn0051928	CG31928	0	0	0
	FBgn0053128	CG33128	0	0	0
	FBgn0051926	CG31926	0	0	0
	FBgn0051661	CG31661	0	0	0
	FBgn0031343	CG18131	0	0	0.282228
	FBgn0031344	CG7420	6.06774	8.31005	6.16354
	FBgn0031345	CG18132	0	0	0
	FBgn0001174	halo	0	0	0
	FBgn0026398	Or22a	0	0	0
	FBgn0026397	Or22b	0	0	0
	FBgn0261509	haf	1.38158	2.07844	1.28096
	FBgn0031347	CG10869	0.380791	0.16115	0.0883728
	FBgn0051935	CG31935	11.3243	8.48382	8.28658
	FBgn0031351	CG14352	6.42637	5.04261	4.88818
	FBgn0021906	RFeSP	1179	2114.48	2097.72
	FBgn0086758	chinmo	0.932517	0.844518	0.99649
	FBgn0011570	cpb	28.603	16.1251	15.1429
	FBgn0031356	CG17660	14.6874	7.58064	13.5527
	FBgn0031357	mRpL48	6.33668	5.65997	7.22384
	FBgn0086698	frtz	9.08748	5.20093	7.08806
	FBgn0031359	CG18317	215.371	148.63	135.367
	FBgn0000579	Eno	2207.22	3075.03	2448.35
	FBgn0260648	Rrp40	4.9041	4.872	5.33677
	FBgn0031360	CG31937	46.5679	34.1631	56.1683
	FBgn0031361	CG17652	10.7891	7.01056	5.11995
	FBgn0264494	CG17646	27.8797	17.7347	21.4604
	FBgn0027597	CG17712	4.80726	4.98403	5.17664
	FBgn0031364	CG17648	0	0	0
	FBgn0041249	Gr22f	0	0	0
	FBgn0031365	CG17650	0	0	0
	FBgn0045497	Gr22e	0	0	0
	FBgn0045498	Gr22d	0	0	0
	FBgn0045499	Gr22c	0	0	0
	FBgn0045500	Gr22b	0	0	0
	FBgn0045501	Gr22a	0	0	0
	FBgn0051933	CG31933	0	0	0
	FBgn0051664	CG31664	7.69156	3.35283	4.97449
	FBgn0031367	c-cup	0	0	0.25564
	FBgn0262275	mir-2280	0	0	0
	FBgn0051665	wry	9.19694	9.42539	8.99337
	FBgn0051663	CG31663	8.17213	6.68044	8.48155
	FBgn0031372	CG7295	0	0	0
	FBgn0031373	CG15358	0.171443	1.44976	2.06606
	FBgn0031374	CG7337	46.2706	40.05	40.3363
	FBgn0011859	tRNA:G3:22BCa	0	0	0
	FBgn0040719	CG15357	0.609849	0	0
	FBgn0053673	CG33673	0	0	0
	FBgn0031375	erm	0.0732037	0	0
	FBgn0051942	tRNA:CR31942	0	0	0
	FBgn0031376	Der-1	25.6635	22.2369	20.5745
	FBgn0031377	CG15356	3.27687	3.76574	4.23987
	FBgn0031378	CG15362	5.74238	4.59311	5.5898
	FBgn0031379	CG7289	10.4046	6.26576	10.7722
	FBgn0001125	Got2	125.361	136.566	115.098
	FBgn0031381	Npc2a	77.5804	61.8924	53.9926
	FBgn0262148	CR42874	0.545251	0.614693	0.3369
	FBgn0043539	Obp22a	0	0	0
	FBgn0053543	CG33543	5.65065	3.82707	3.63825
	FBgn0263441	CR43464	0.430144	0.29129	0.718874
	FBgn0040718	CG15353	4.19004	22.7877	14.333
	FBgn0040717	Nplp4	2.76225	4.62972	0
	FBgn0051943	tRNA:CR31943	0	0	0
	FBgn0051944	tRNA:CR31944	0	0	0
	FBgn0031384	CG4238	6.55018	7.4546	5.30459
	FBgn0051939	tRNA:CR31939	0	0	0
	FBgn0051940	tRNA:CR31940	0	0	0
	FBgn0051669	tRNA:CR31669	0	0	0
	FBgn0011860	tRNA:G3:22BCb	0	0	0
	FBgn0259192	CG42296	0	0	0
	FBgn0259230	lectin-22C	0	0	0
	FBgn0003557	Su(dx)	24.8347	17.6079	20.4332
	FBgn0028952	Kebab	0.397017	0.672023	0.184185
	FBgn0026396	Or22c	0	0	0
	FBgn0053516	dpr3	2.21791	1.291	1.93115
	FBgn0031388	CG12674	0	0	0
	FBgn0031389	CG4259	38.1721	11.179	14.3679
	FBgn0004507	GlyP	924.007	1346.46	1083.22
	FBgn0031390	tho2	7.48184	6.74898	8.31499
	FBgn0031391	CG11723	5.68234	6.19661	5.62338
	FBgn0027509	CG7261	5.19304	3.4648	3.50877
	FBgn0031392	AIF	5.12009	4.77445	7.51134
	FBgn0031393	CG15382	0.679023	1.14764	0.419208
	FBgn0000097	aop	11.0081	6.89155	7.84715
	FBgn0264082	CG43751	0	0	0.138562
	FBgn0051946	tRNA:CR31946	0	0	0
	FBgn0031395	CG10874	13.5652	10.403	13.0812
	FBgn0085201	CG34172	2478.09	2918.5	2572.78
	FBgn0051668	CG31668	0	0	0
	FBgn0053124	CG33124	0.305262	0	0
	FBgn0031397	CG15385	5.99338	4.43335	4.51578
	FBgn0010288	Uch	24.1008	16.2075	19.0003
	FBgn0085203	CG34174	4.93747	0.595168	5.21337
	FBgn0031398	CG10880	2.10132	1.4807	1.46474
	FBgn0259717	CG42371	56.5501	45.1944	50.8533
	FBgn0031399	mio	6.68343	7.86237	5.94579
	FBgn0031401	papi	19.7605	13.4603	12.031
	FBgn0031403	CG15387	3.70636	1.87603	2.39621
	FBgn0010704	l(2)s5379	49.3996	42.0951	37.2651
	FBgn0262126	gho	17.6883	15.0204	16.7076
	FBgn0051679	Tengl3	0	0.349248	0
	FBgn0052463	Tengl2	0	0	0
	FBgn0051682	Tengl1	0	0	0
	FBgn0031405	CG4267	20.173	13.1886	11.0006
	FBgn0051686	CG31686	0.710453	0.599453	0
	FBgn0262106	CR42859	0.427945	0.72153	0
	FBgn0011832	Ser12	0	0	0
	FBgn0042186	CG17239	0	0	0
	FBgn0042187	CG17234	0	0	0
	FBgn0031406	Send1	0	0	0
	FBgn0031407	CG4270	0	0	0
	FBgn0054049	CG34049	0	0	0
	FBgn0250841	CG17242	0	0	0
	FBgn0264084	CR43753	0	0	0
	FBgn0264085	CR43754	0	0	0
	FBgn0031409	CG4271	0	0	0
	FBgn0051681	CG31681	0	0	0
	FBgn0261523	CG42658	0	0	0
	FBgn0031410	CG17237	0	0	0
	FBgn0028570	robl22E	0	0	0
	FBgn0051949	CG31949	0	0	0
	FBgn0031412	CG16995	0	0	0
	FBgn0031414	eys	2.53019	2.87281	2.34964
	FBgn0031413	CG9967	2.52713	2.59923	1.96641
	FBgn0014010	Rab5	68.201	50.2933	60.734
	FBgn0261647	Axud1	4.49146	3.65357	4.75809
	FBgn0031417	CG3597	43.5497	33.8495	50.3232
	FBgn0031418	CG3609	28.3434	30.8647	73.6911
	FBgn0031419	CG15390	0.256473	1.29995	0.949504
	FBgn0031420	CG9866	4.03128	4.55169	3.23434
	FBgn0264672	Eogt	3.23501	2.92383	2.67416
	FBgn0031422	CG9870	0.590913	0.999663	0.411011
	FBgn0031423	CG3557	0	0	0
	FBgn0264081	CG43750	0	0	0
	FBgn0031424	VGlut	6.95828	7.12665	7.10793
	FBgn0031426	CG18641	0	0	0
	FBgn0051948	CG31948	0	0	0
	FBgn0085477	CG34448	0	0	0
	FBgn0085476	CG34447	0	0	0
	FBgn0031428	CG9886	5.20081	3.69725	6.66148
	FBgn0000490	dpp	4.36735	4.19801	4.30973
	FBgn0012017	tRNA:Y1:22Fb	0	0	0
	FBgn0012016	tRNA:Y1:22Fa	0	0	0
	FBgn0031429	CG15393	0	0	0
	FBgn0015816	Slh	11.4394	12.0416	10.976
	FBgn0011818	oaf	8.0132	7.40297	7.41367
	FBgn0031430	CG3528	0	0	0
	FBgn0031431	CG3515	0	0	0.133209
	FBgn0031432	Cyp309a1	8.80776	8.71223	22.1224
	FBgn0041337	Cyp309a2	4.6368	4.51214	13.3384
	FBgn0085343	CG34314	1.44364	0.732702	1.47281
	FBgn0031434	insv	0.783837	0.884206	1.09075
	FBgn0031435	CG9883	0.583456	0	1.3528
	FBgn0031436	CG3214	1285.35	1234.86	1086.13
	FBgn0031437	p16-ARC	20.9891	11.0723	16.9755
	FBgn0026479	Drp1	17.3758	14.7749	16.9176
	FBgn0250835	CG15394	7.9071	7.01773	4.99253
	FBgn0031440	CG15395	0	0	0
	FBgn0263322	CG43403	0	0	0
	FBgn0264434	CR43852	0	0	0
	FBgn0031441	CG9962	0	0	0
	FBgn0264433	CG43851	0	0	0
	FBgn0053125	CG33125	0	0	0.0490173
	FBgn0031442	Prosbeta4R1	0	0	0
	FBgn0026395	Or23a	0	0	0
	FBgn0031443	Prosbeta4R2	0	0	0
	FBgn0031444	CG9879	0	0	0
	FBgn0041248	Gr23a	0	0	0
	FBgn0051690	CG31690	2.35589	2.47999	1.89256
	FBgn0031446	CG15398	0	0	0
	FBgn0031449	CG31689	54.7609	41.7558	58.9866
	FBgn0263564	mir-4914	0	0	0
	FBgn0031450	Hrs	18.8368	11.7979	10.4407
	FBgn0031451	CG9961	0	0	0.431726
	FBgn0031452	Cwc25	5.40547	4.46714	5.13173
	FBgn0250906	Pgk	762.765	1024.62	926.03
	FBgn0031453	CG9894	158.928	108.077	143.794
	FBgn0031455	snapin	7.71172	5.63169	7.14823
	FBgn0031456	Trn-SR	3.92615	2.63841	2.83648
	FBgn0031457	CG3077	11.5574	7.76626	6.01875
	FBgn0031458	aph-1	12.6654	10.4583	6.76975
	FBgn0026324	Taf10b	14.9611	6.58859	12.9276
	FBgn0019830	colt	47.9726	64.0952	66.4465
	FBgn0028398	Taf10	39.3667	24.3901	37.4502
	FBgn0031459	CG2862	42.5599	57.2593	60.2765
	FBgn0031460	CG15399	0.594405	0.501885	0.549731
	FBgn0004242	Syt1	40.3429	38.7878	39.7722
	FBgn0264369	CR43821	0	0	0
	FBgn0031461	daw	25.7947	15.9238	13.8675
	FBgn0031462	CG2964	0	0	0
	FBgn0031463	CG15400	0.762253	0.64443	0.176589
	FBgn0031464	Duox	2.36058	2.96678	4.56424
	FBgn0031465	CG3123	0	0	0
	FBgn0031466	CG3119	0.573368	1.61583	0.378947
	FBgn0031467	Cpr23B	0	0	0
	FBgn0031468	CG2975	0.342507	0.19322	0
	FBgn0031469	CG18558	0	0	0
	FBgn0031470	CG18557	4.87286	0	0
	FBgn0031471	CG3117	4.01403	0.376918	0
	FBgn0031472	CG2983	0	0	0
	FBgn0031473	CG3104	2.01415	3.90097	2.71414
	FBgn0015521	RpS21	409.116	533.876	632.192
	FBgn0031474	CG2991	30.085	20.9155	21.5346
	FBgn0051694	CG31694	92.4019	68.5294	49.676
	FBgn0031476	CG8813	1.64699	0.795237	0.21785
	FBgn0031478	CG8814	14.1372	15.0034	15.1187
	FBgn0031479	Prx6005	5.06614	7.60604	4.94712
	FBgn0051950	CG31950	2.46242	12.4276	4.52813
	FBgn0028970	betaggt-II	13.7689	11.5148	13.4849
	FBgn0024947	NTPase	104.519	89.5619	108.823
	FBgn0041111	lilli	9.42569	8.70115	9.80649
	FBgn0010263	Rbp9	104.845	95.2013	97.5096
	FBgn0024920	Ts	0.337296	0.285234	0.625376
	FBgn0004584	Rrp1	1.74659	0.940919	1.32696
	FBgn0260639	gammaTub23C	7.90588	3.93519	7.44411
	FBgn0031483	CG9641	3.78176	2.07096	4.18911
	FBgn0031484	CG3165	6.49219	4.04525	3.64266
	FBgn0031485	CG9643	6.22077	3.31617	11.5
	FBgn0250786	Chd1	8.93133	8.53424	9.66414
	FBgn0025109	Bem46	5.20736	3.86851	3.41717
	FBgn0002989	okr	1.73695	1.34801	1.34426
	FBgn0025681	CG3558	32.3798	17.2159	22.004
	FBgn0031488	CG17265	0.761114	0.537041	0.824791
	FBgn0031489	CG17224	49.8686	37.2576	51.4686
	FBgn0031490	CG17264	2.57921	2.91129	3.56014
	FBgn0031491	alpha4GT1	11.528	7.28837	8.22713
	FBgn0031492	CG3542	3.88138	3.63814	3.92415
	FBgn0031493	CG3605	11.2106	8.38613	11.4574
	FBgn0031494	CG17219	1.25944	0.608515	0.667036
	FBgn0031495	GABPI	15.6693	10.4637	10.672
	FBgn0031496	CG17258	0	0	0.0675857
	FBgn0031497	CG17259	16.8608	16.1704	19.9239
	FBgn0031498	CG17260	7.24707	4.63084	3.13567
	FBgn0243513	cnir	4.16217	2.34344	1.79702
	FBgn0031500	CG17221	21.9386	23.5853	27.2797
	FBgn0031501	CG17261	0.451546	0	0.832842
	FBgn0042627	v(2)k05816	1.16414	8.6511	8.48431
	FBgn0263847	CR43708	0	0	0
	FBgn0003934	snRNA:U5:23D	0	0	0
	FBgn0027571	CG3523	159.29	132.2	369.048
	FBgn0015600	toc	21.5376	18.6996	20.7688
	FBgn0005779	PpD6	0	0	0
	FBgn0031504	CG15403	0	0	0
	FBgn0031505	CG12400	896.589	1085.45	887
	FBgn0011648	Mad	18.667	12.9922	13.3503
	FBgn0260817	gkt	2.86426	1.53538	2.74753
	FBgn0051953	CR31953	1.42348	0.900801	1.31507
	FBgn0014906	Hydr2	19.456	13.7263	17.3831
	FBgn0011985	tRNA:S7:23Eb	0	0	0
	FBgn0085435	CG34406	0.382831	0.486038	0.621918
	FBgn0011984	tRNA:S7:23Ea	0	0	0
	FBgn0051698	CG31698	0	0	0
	FBgn0031512	CG15404	0	0	0
	FBgn0085422	CG34393	1.23216	0.73636	0.807742
	FBgn0031513	CG3347	0	0	0
	FBgn0031514	CG3332	2.05415	0.670982	2.65897
	FBgn0031515	CG9664	5.33024	2.63051	3.70607
	FBgn0031516	CG9663	6.44129	5.28146	10.2018
	FBgn0031518	CG3277	0.355969	0.200947	0.936895
	FBgn0031519	CG3326	0.184585	0.312476	0.257039
	FBgn0031517	CG15406	5.16708	0	7.00562
	FBgn0031520	CG8837	3.66486	2.40083	4.60736
	FBgn0053281	CG33281	0.95911	3.47734	1.90641
	FBgn0053282	CG33282	0	0	0
	FBgn0031522	CG3285	2.1444	0	1.74058
	FBgn0031523	CG15408	0.700718	0	1.42987
	FBgn0020445	E23	3.61803	2.32227	2.83383
	FBgn0031526	CG8838	0	0	0
	FBgn0085423	CG34394	11.808	8.52806	10.9723
	FBgn0031528	CG15412	131.603	90.6902	98.542
	FBgn0031529	CG9662	6.61683	8.39709	5.45699
	FBgn0016698	Ptpa	19.3282	13.7798	12.1448
	FBgn0259949	Sfp23F	0	0	0
	FBgn0259950	CG42460	0	0	0
	FBgn0085204	CG34175	0	0	0
	FBgn0031530	pgant2	2.59767	2.86392	2.41292
	FBgn0031531	CG8840	0	0	0
	FBgn0051952	CG31952	0	0	0
	FBgn0031533	CG2772	0	0	13.2101
	FBgn0031534	Snx1	13.8237	10.5379	10.7734
	FBgn0031535	CG12795	12.8404	5.20658	9.03202
	FBgn0031536	Cog3	6.30683	4.27175	5.01134
	FBgn0031537	sec5	7.6442	5.79377	9.05983
	FBgn0031538	CG3246	71.149	49.9339	73.2636
	FBgn0005616	msl-2	3.59558	3.56372	3.39279
	FBgn0263526	mir-4971	0	0	0
	FBgn0021967	Pdsw	658.124	794.683	683.996
	FBgn0031540	CG3238	1.07462	0.699764	1.30483
	FBgn0051776	CG31776	0.109038	0.184547	0.303583
	FBgn0051956	pgant4	11.8681	1.33175	2.19109
	FBgn0264549	CR43928	26.8816	4.07158	3.503
	FBgn0261560	Thor	2681.53	1472.49	1129.87
	FBgn0031542	CG15414	1.42719	2.4141	1.02925
	FBgn0014396	tim	16.2922	7.48654	6.09175
	FBgn0051954	CG31954	0.72317	0	0
	FBgn0053123	CG33123	11.1787	8.91485	9.98187
	FBgn0031544	CG17593	17.8139	14.5219	16.4062
	FBgn0031545	CG3213	0	0	0
	FBgn0031546	CG8851	0	0	0
	FBgn0031547	Sr-CIV	1.12089	0	0
	FBgn0031548	CG8852	4.21991	5.06038	2.61194
	FBgn0031549	Spindly	0.825591	1.39777	0.459949
	FBgn0031550	Che-13	0	0	0.275869
	FBgn0024244	drm	1.5202	2.6422	1.76935
	FBgn0264370	CR43822	0	0	0
	FBgn0264363	CG43815	0	0	0
	FBgn0004892	sob	0.160532	0.271796	0.521725
	FBgn0264371	CR43823	0	0	0
	FBgn0002985	odd	0.811939	0.610901	0.335022
	FBgn0015663	Dot	3.74537	2.60106	1.96127
	FBgn0031554	CG15418	1.07619	1.81212	1.98179
	FBgn0000721	for	53.4298	44.0822	49.4414
	FBgn0263523	mir-4972	0	0	0
	FBgn0085369	CG34340	1.4442	0.950898	1.41553
	FBgn0259951	Sfp24Ba	0	0	0
	FBgn0259953	CG42463	0	0	0
	FBgn0259952	Sfp24Bb	0	0	0
	FBgn0261054	Sfp24Bc	0	0	0
	FBgn0031558	CG16704	197.935	187.182	166.888
	FBgn0031559	CG3513	12.0801	5.07208	2.07726
	FBgn0051779	Acp24A4	0	0	0.996824
	FBgn0263096	CR43364	0	0	0
	FBgn0262721	CG43165	0.769766	0	0.705765
	FBgn0031560	CG16713	320.954	182.743	178.654
	FBgn0031561	CG16712	1014.54	504.77	589.193
	FBgn0031562	CG3604	0	0	0.387297
	FBgn0031563	CG10031	61.3508	38.4678	38.1407
	FBgn0259954	CG42464	2.84017	0	0
	FBgn0259955	CG42465	0	0	0
	FBgn0259956	Sfp24C1	0	0	0
	FBgn0259957	CG42467	0	0	0
	FBgn0262621	CG43145	0	0	0
	FBgn0031564	CG2816	3.10937	3.49129	0.954662
	FBgn0051778	CG31778	27.3562	18.9189	13.0551
	FBgn0051777	CG31777	90.0558	35.8798	37.5213
	FBgn0015376	cutlet	1.40673	1.08281	0.772101
	FBgn0051955	CG31955	4.23316	3.3266	4.73389
	FBgn0031566	CG2818	7.87164	6.28812	6.98094
	FBgn0040104	lectin-24A	13.0813	0.409349	0
	FBgn0003386	Shaw	8.00914	6.6244	6.57829
	FBgn0031568	CG10019	0.48972	0.369571	0.400067
	FBgn0263846	CG43707	17.3355	10.1902	10.397
	FBgn0263842	CG43703	0	0	0
	FBgn0262392	mir-1004	0	0	0
	FBgn0263843	CR43704	0.536623	0	0
	FBgn0004893	bowl	2.87688	4.66513	3.27634
	FBgn0051960	CG31960	0	0	0
	FBgn0051958	CG31958	0	0	0
	FBgn0031571	CG3921	3.62817	3.26572	3.18747
	FBgn0021800	l(2)k16918	6.13746	6.67816	6.10314
	FBgn0031573	CG3407	2.35369	0.737907	1.29498
	FBgn0003430	slp1	1.82064	1.02663	1.26626
	FBgn0004567	slp2	0.536612	0.302812	0.332129
	FBgn0031574	CG3964	1.44614	14.7963	6.2689
	FBgn0031575	Cep97	2.49702	4.50955	2.31984
	FBgn0051957	CG31957	6.89246	5.81367	10.6073
	FBgn0000256	capu	6.55616	6.51373	8.1434
	FBgn0051774	fred	0.355177	0.476048	0.559801
	FBgn0051773	CG31773	0	0	0
	FBgn0264341	CG43797	0	0	0.29014
	FBgn0085205	CG34176	1.64908	1.38362	29.4538
	FBgn0031579	CG15422	2.24927	1.26494	13.1559
	FBgn0031580	CG15423	6.82336	1.64234	19.7637
	FBgn0264295	CG43773	0	0	1.3323
	FBgn0264296	CG43774	6.42537	1.19962	11.139
	FBgn0000547	ed	8.82343	10.3062	9.95233
	FBgn0086032	snoRNA:Me28S-C437	0	0	0
	FBgn0020376	Sr-CIII	0	0	0
	FBgn0014033	Sr-CI	42.4722	19.2176	15.124
	FBgn0031585	CG2955	0	0	0
	FBgn0026394	Or24a	0.19001	0	0
	FBgn0051961	CG31961	15.2683	8.51326	8.86609
	FBgn0040102	lectin-24Db	25.3446	15.9446	17.6581
	FBgn0031589	CG3714	44.8774	37.5808	43.2354
	FBgn0001075	ft	0.459203	0.837971	0.558309
	FBgn0031590	CG3702	18.4376	12.0631	20.7562
	FBgn0003941	RpL40	750.555	585.765	849.419
	FBgn0031591	CG15425	0	0	0
	FBgn0031592	Art2	0	0	0.14312
	FBgn0010473	tutl	10.1748	14.2148	13.4219
	FBgn0028482	CG16857	18.9186	23.308	21.139
	FBgn0020762	Atet	18.36	10.8637	12.5351
	FBgn0262375	mir-1005	0	0	0
	FBgn0031596	CG15429	0	0	0
	FBgn0026319	Traf4	3.20508	6.93315	5.32631
	FBgn0031597	CG17612	1.87962	1.30982	2.36006
	FBgn0031598	CG3338	6.88463	4.63931	4.82813
	FBgn0261976	Psf2	8.6052	8.44314	9.79218
	FBgn0027560	Tps1	263.059	236.776	371.725
	FBgn0031600	CG3652	18.9757	8.48413	11.1012
	FBgn0022153	l(2)k05819	8.29591	5.84588	6.63451
	FBgn0053003	CG33003	0.109463	0.185222	0.101566
	FBgn0031601	Dim1	11.5283	14.2016	7.36138
	FBgn0031602	CG15431	0.492564	0.707119	0.85013
	FBgn0262357	CG43055	0.446417	0	0.823459
	FBgn0051963	tRNA:CR31963	0	0	0
	FBgn0085207	CG34178	0	0	0
	FBgn0085206	CG34177	0	0	0
	FBgn0262358	CG43056	0	0	0
	FBgn0259958	Sfp24F	0	0	0
	FBgn0031603	CG15432	18.4868	7.98087	18.5307
	FBgn0027609	morgue	9.6631	10.6917	8.85061
	FBgn0031604	Elp3	8.20612	4.49888	7.61492
	FBgn0025684	MFS18	8.00793	8.05286	10.5541
	FBgn0031606	CG15439	2.49993	1.90509	3.71538
	FBgn0031607	CG15440	9.20674	6.22739	10.7511
	FBgn0040705	CG15434	202.363	190.928	126.499
	FBgn0019982	Gs1l	74.4959	76.2518	87.3627
	FBgn0261606	RpL27A	988.829	943.995	1350.94
	FBgn0065053	snoRNA:Me18S-C1831	0	0	0
	FBgn0053002	mRpL27	60.9506	93.0991	79.4653
	FBgn0031608	CG15435	1.28727	1.38633	1.95463
	FBgn0031609	CG15443	11.6298	5.95992	9.14653
	FBgn0031610	CG15436	1.45299	1.63843	1.19748
	FBgn0031611	CG17840	3.63587	2.88157	3.80734
	FBgn0011603	ine	19.0632	18.3552	16.0784
	FBgn0053196	dp	6.842	7.9394	6.48189
	FBgn0031613	HP6	1.22738	0	0
	FBgn0263869	CR43716	0	0.684465	0
	FBgn0083938	BG642163	0	0	0
	FBgn0031617	CG15635	0	0.098775	0
	FBgn0264342	CG43798	0	0	0
	FBgn0031619	CG3355	0	0	0
	FBgn0031620	CG11929	0	0	0
	FBgn0000227	Bsg25A	0	0	0
	FBgn0031621	CG15634	0.153378	0	0
	FBgn0031622	CG3251	0	0	0
	FBgn0085380	CG34351	2.37591	3.15349	1.96826
	FBgn0031623	Taf12L	0	0	0
	FBgn0031626	CG15631	0	0	0
	FBgn0031627	CG15630	4.00042	2.92179	3.78762
	FBgn0260428	CG42523	0	0	0
	FBgn0031628	CG3294	2.57502	1.48503	1.90992
	FBgn0031629	Clect27	45.7734	73.5392	70.6426
	FBgn0031630	CG15629	10.0638	17.5476	15.6491
	FBgn0031631	CG3225	1.14855	1.64527	1.47647
	FBgn0263577	mir-4910	0	0	0
	FBgn0031632	CG15628	92.8897	86.9905	110.31
	FBgn0031633	CG2976	18.776	12.1094	21.1647
	FBgn0263575	mir-4912	0	0	0
	FBgn0031634	Ir25a	0.560756	0.474721	0.781218
	FBgn0031635	CG15626	31.7511	23.4399	26.3615
	FBgn0031636	CG12194	5.5047	3.25528	3.22349
	FBgn0031637	CG2950	68.2625	49.3018	50.1886
	FBgn0031638	CG11927	4.12726	3.17459	4.75755
	FBgn0031639	mRpS2	14.4568	10.9039	18.1585
	FBgn0031640	CG11926	7.54392	6.57713	11.3494
	FBgn0051660	pog	1.88651	1.55578	1.45311
	FBgn0000286	Cf2	20.4423	19.2195	17.802
	FBgn0031643	CG3008	41.6448	32.1143	30.3088
	FBgn0031644	CG15625	0	0.572922	0.314031
	FBgn0031645	CG3036	66.1867	35.2798	68.292
	FBgn0031646	CG2837	0.462328	0.781467	0.62861
	FBgn0041150	hoe1	49.018	53.0711	54.4741
	FBgn0031649	hoe2	2.52377	3.17452	2.20991
	FBgn0003372	Sgs1	0.0518734	0.702853	0.0963863
	FBgn0031650	CG14044	0.512988	0.289197	0.158514
	FBgn0031651	mRpL24	39.6304	28.6864	43.7319
	FBgn0015000	betaggt-I	18.0262	14.2796	12.3875
	FBgn0031652	jet	15.796	16.8248	14.059
	FBgn0031653	Jon25Biii	12.2038	5.02643	256.561
	FBgn0031654	Jon25Bii	0.544953	0	1.26056
	FBgn0020906	Jon25Bi	1.39726	0.472009	1.03413
	FBgn0031655	Marcal1	3.32145	2.07165	3.97644
	FBgn0083960	CG34124	0.032367	0	0
	FBgn0264372	CR43824	0	0	0
	FBgn0083961	CG34125	30.7293	18.3721	15.0836
	FBgn0015834	Trip1	86.9971	80.2629	94.9757
	FBgn0262467	Scox	16.7823	20.0447	22.795
	FBgn0031657	CG3756	7.7397	3.69078	5.33234
	FBgn0010607	l(2)05714	7.82172	5.35315	8.73402
	FBgn0031659	CG14043	6.89803	4.92546	8.50265
	FBgn0031660	mRpL28	113.441	102.877	102.301
	FBgn0031661	Gmd	6.32446	3.32894	4.82325
	FBgn0031662	CG3792	13.53	9.66645	14.3037
	FBgn0031663	CG8891	10.3734	7.11419	11.3869
	FBgn0031664	CG8892	5.11928	1.85637	4.41064
	FBgn0083962	CG34126	12.7022	8.52021	12.2972
	FBgn0053113	Rtnl1	213.974	224.8	180.703
	FBgn0259719	Tfb5	21.5724	15.5449	21.817
	FBgn0031670	CG3887	26.557	21.8585	25.3289
	FBgn0016075	vkg	58.818	48.1678	48.1481
	FBgn0000299	Cg25C	105.009	88.827	92.0836
	FBgn0260470	SP555	3.48397	4.40416	4.67795
	FBgn0053995	CG33995	32.0859	11.6524	10.5786
	FBgn0031674	CG31919	12.8674	6.94294	7.92841
	FBgn0031673	CG31650	16.8653	16.8311	17.3267
	FBgn0031675	CG9121	12.8788	5.4078	5.03306
	FBgn0022023	eIF-3p40	113.37	110.188	134.531
	FBgn0031676	CG14040	7.49406	3.91916	5.05564
	FBgn0031677	CG14036	0.71393	1.19962	4.58666
	FBgn0014857	His3.3A	63.5296	65.3421	77.4483
	FBgn0031678	CG31918	0.373553	0.790451	1.30044
	FBgn0028694	Rpn11	29.1416	27.3402	31.5359
	FBgn0028572	qtc	11.2782	11.9435	12.9374
	FBgn0262213	mir-2495	0	0	0
	FBgn0264368	CR43820	2.74541	3.60557	2.5387
	FBgn0261608	RpL37A	489.49	554.753	845.859
	FBgn0031681	pgant5	7.01609	6.03142	6.52459
	FBgn0031682	CG5828	6.52293	5.78008	10.9457
	FBgn0031683	CG4230	32.6747	24.291	29.6513
	FBgn0031684	CG8680	531.491	616.472	474.851
	FBgn0261836	Msp-300	44.4296	53.6368	42.6892
	FBgn0065083	snmRNA:765	0	0	0
	FBgn0065107	snmRNA:128	0	0	0
	FBgn0065104	snmRNA:158	7.20976e-193	55.2942	0
	FBgn0082990	snoRNA:Psi28S-2263	0	0	0
	FBgn0083028	snoRNA:Psi18S-525k	0	0	0
	FBgn0031688	Cyp28d2	0.650602	1.10087	1.32785
	FBgn0031689	Cyp28d1	70.9927	93.5779	77.5198
	FBgn0031690	CG7742	0.122419	0.207163	0.567928
	FBgn0250847	CG14034	0	0	0
	FBgn0031692	TpnC25D	48.396	63.1004	44.2929
	FBgn0046776	CR14033	0.430247	0.485265	0.665074
	FBgn0003716	tkv	25.9373	18.5767	25.999
	FBgn0051971	tRNA:CR31971	0	0	0
	FBgn0051914	tRNA:CR31914	0	0	0
	FBgn0031693	Cyp4ac1	24.7726	12.8295	15.3412
	FBgn0031694	Cyp4ac2	7.81608	4.08607	3.94997
	FBgn0031695	Cyp4ac3	1.65573	2.10103	2.94364
	FBgn0000228	Bsg25D	10.598	9.8336	11.3041
	FBgn0031696	Bub1	4.36179	3.73924	4.15224
	FBgn0016076	vri	69.3005	34.3102	37.9257
	FBgn0031697	CG14024	0.603908	0.614312	0.970957
	FBgn0031698	Ncoa6	5.88984	5.43399	6.33061
	FBgn0015031	cype	2812.91	3861.26	3492.57
	FBgn0031700	CG14022	891.374	366.529	563.236
	FBgn0031701	TotM	2859.06	12.3498	8.31005
	FBgn0031702	fusl	12.6013	9.46398	18.2041
	FBgn0031703	CG12512	18.8064	19.399	18.912
	FBgn0016920	nompC	0.826084	0.930303	0.845433
	FBgn0262097	CG42850	0	0	0
	FBgn0016660	H15	0.0821449	0.278152	0.0762742
	FBgn0263866	CR43713	0	0	0
	FBgn0263867	CR43714	0	0	0
	FBgn0263868	CR43715	0	0	0
	FBgn0051647	CR31647	0	0	0
	FBgn0086033	snoRNA:Me28S-A2486	0	0	0
	FBgn0261963	mid	0.995375	0.843001	1.02221
	FBgn0031707	CG14020	0.168215	0.284503	0
	FBgn0031708	CG7382	38.306	37.4368	35.1893
	FBgn0000318	cl	72.1071	50.852	82.0597
	FBgn0031710	CG7371	9.70554	8.71727	9.46873
	FBgn0031711	CG6907	11.8567	7.49585	11.1203
	FBgn0051989	Cap-D3	3.23899	1.88414	2.82983
	FBgn0031715	tomb	0	0	0.269992
	FBgn0031716	CG14015	2.8706	2.34578	2.38896
	FBgn0051648	CG31648	13.1868	6.36456	14.6922
	FBgn0051915	CG31915	13.9042	7.7528	13.2195
	FBgn0031713	CG7277	38.5871	49.3695	43.635
	FBgn0014189	Hel25E	21.4073	13.4072	23.8588
	FBgn0002525	Lam	6.76192	5.72524	10.878
	FBgn0031717	Oscillin	12.2254	9.14105	14.9516
	FBgn0031718	CG14014	0	0	0
	FBgn0031719	CG18269	0	0	0
	FBgn0031720	CG14013	0	0	0
	FBgn0031721	CG14017	0	0	0
	FBgn0004620	GluRIIA	1.08174	1.07756	1.65492
	FBgn0020429	GluRIIB	0.0705287	0	0.131005
	FBgn0041719	snRNA:U4:25F	0	0	0
	FBgn0031722	CG14011	0	0	0
	FBgn0031723	CG7251	0	0	0.174066
	FBgn0031724	CG18266	0	0	0
	FBgn0031725	CG14010	1.81918	1.22736	0.843022
	FBgn0031726	Cyp6a16Psi	0.287671	0	0.266806
	FBgn0051646	CG31646	0.724797	1.71817	1.21161
	FBgn0262256	mir-959	0	0	0
	FBgn0262321	mir-960	0	0	0
	FBgn0262239	mir-961	0	0	0
	FBgn0262200	mir-962	0	0	0
	FBgn0262333	mir-963	0	0	0
	FBgn0262243	mir-964	0	0	0
	FBgn0031728	Hsp60C	0	0	0
	FBgn0031729	CG12511	0	0	0
	FBgn0031730	CG7236	0.297453	0.754817	0.506969
	FBgn0031731	CG14007	0	0	0
	FBgn0054011	CG34011	0	0	0
	FBgn0031732	CG11149	0	0	2.97975
	FBgn0024191	sip1	1.35566	1.35016	1.70312
	FBgn0031736	CG11030	10.5618	6.09065	7.79456
	FBgn0031733	CG14006	0.175908	0	0
	FBgn0031734	CG11147	36.5894	36.2825	38.6965
	FBgn0031735	CG11029	0.239322	0.405004	0.666192
	FBgn0031737	obst-E	6.36444	7.57629	5.67767
	FBgn0031738	CG9171	4.06787	3.07852	3.6688
	FBgn0051912	CR31912	2.02952	2.79032	2.82436
	FBgn0051913	CG31913	0.280649	0	0
	FBgn0031739	CG14005	4.6213	4.39517	4.7942
	FBgn0031740	CG7239	3.70956	3.97567	5.50687
	FBgn0031741	CG11034	1.44411	1.22236	13.407
	FBgn0262999	CG43307	0	0	0
	FBgn0051644	CG31644	0	0	0
	FBgn0085410	TrissinR	0.885432	1.00493	0.757896
	FBgn0031745	CG8965	15.492	11.8905	3.03699
	FBgn0259959	Sfp26Ac	0	0	0
	FBgn0262814	CG43185	0	0	0
	FBgn0031746	CG9029	0	0	0
	FBgn0002856	Acp26Ab	0	0	0
	FBgn0002855	Acp26Aa	0	0	0
	FBgn0031747	CG9021	0.384106	0.324729	0.533894
	FBgn0264352	CR43808	0.790621	0	0
	FBgn0043362	bchs	6.89857	4.47011	4.28066
	FBgn0031749	CG14000	0	0	0
	FBgn0031751	CG9016	0.350162	0	0.325983
	FBgn0264547	CR43926	0	0	0
	FBgn0015381	dsf	0	0	0
	FBgn0261055	Sfp26Ad	0	0	0
	FBgn0001128	Gpdh	1242.33	2002.2	1252.57
	FBgn0031752	CG9044	37.954	25.0554	27.4525
	FBgn0031753	CG13999	2.90893	1.13461	1.24336
	FBgn0040949	CG13998	0	0	0
	FBgn0003980	Vm26Ab	0.850334	5.73504	97.679
	FBgn0086266	Vm26Ac	0.423335	0	0.390608
	FBgn0003979	Vm26Aa	1.23281	3.46503	120.225
	FBgn0086265	psd	0.731992	0	2.37581
	FBgn0031756	CG13992	0.274642	0.309955	0.510566
	FBgn0031757	Ucp4C	0	0	0
	FBgn0263442	CR43465	0	0	0
	FBgn0031758	Ucp4B	0.860542	1.60999	0
	FBgn0000308	chic	229.487	124.137	143.801
	FBgn0001942	eIF-4a	492.552	469.393	566.266
	FBgn0001941	ifc	22.1436	10.051	26.5111
	FBgn0031759	lid	12.2953	9.93025	13.138
	FBgn0031760	Tsp26A	1.99702	2.65594	1.78779
	FBgn0264448	CR43866	2.94314	2.39078	2.62176
	FBgn0001089	Gal	1.71095	2.44523	2.00645
	FBgn0031762	CG9098	1.1085	1.40875	1.05591
	FBgn0001170	H2.0	0	0.66625	0.121759
	FBgn0031763	CG13996	0	0	0
	FBgn0031764	CG9107	4.87412	4.36628	5.46877
	FBgn0031765	CG9109	0.238736	0.202002	0.553811
	FBgn0025742	mtm	10.2124	10.1988	7.86761
	FBgn0031766	CG9117	1.58646	2.23342	1.46812
	FBgn0051643	CG31643	5.61202	2.92389	5.07829
	FBgn0000052	ade2	22.4088	16.2637	19.615
	FBgn0262317	mir-966	0	0	0
	FBgn0029161	slmo	359.747	418.401	435.035
	FBgn0085208	CG34179	0.27421	0.578163	0.479223
	FBgn0031768	CG12393	11.2397	10.5516	10.0034
	FBgn0031769	CG9135	3.12984	3.07277	4.43783
	FBgn0031770	CG13995	1.77463	1.24358	1.64844
	FBgn0085209	CG34180	20.0694	10.704	26.6948
	FBgn0031771	CG9140	1145.45	1340.63	1346.75
	FBgn0031772	CG13994	13.7143	5.96621	14.6899
	FBgn0031773	Fbw5	13.9156	11.6214	11.0238
	FBgn0031774	CG9147	9.16285	4.24941	6.04657
	FBgn0031775	CG9150	0	0.443709	0
	FBgn0031776	CG13993	20.0059	13.0283	15.5136
	FBgn0031777	CG9154	9.08216	3.40663	4.04131
	FBgn0028419	Kr-h2	22.859	16.8363	23.9624
	FBgn0264345	CR43801	2.5641	1.72753	0.472396
	FBgn0031778	CR9162	0.36519	0.926314	0
	FBgn0028420	Kr-h1	18.4759	17.421	23.5547
	FBgn0031779	CG9175	5.02761	4.68915	6.66646
	FBgn0051641	stai	17.2838	11.9813	16.233
	FBgn0051642	CG31642	0	0	0.102042
	FBgn0031781	Arc-p20	35.7814	23.5482	25.4524
	FBgn0031782	WDR79	2.0481	1.84815	4.43288
	FBgn0261683	CG42730	0.0790073	0	0
	FBgn0031784	CG9222	0	0	0.163311
	FBgn0031785	CG13991	0	0	0
	FBgn0040950	Muc26B	0	0	0
	FBgn0051639	CG31639	0	0	0
	FBgn0031786	CG13989	0	0	0
	FBgn0085409	CG34380	2.0229	2.06632	2.46382
	FBgn0026755	Ugt37b1	0	0.422205	0.347231
	FBgn0053531	Ddr	1.03359	0.875219	1.12018
	FBgn0031791	CG9486	1.98152	4.30297	4.97548
	FBgn0031792	CG13983	0	0	0
	FBgn0261699	CR42735	0	0	0
	FBgn0264543	CG43922	0	0	0
	FBgn0260452	CG13984	0	0	0
	FBgn0021873	Gef26	6.04256	5.82385	6.64173
	FBgn0031799	Pez	9.06486	5.19554	4.67927
	FBgn0015623	Cpr	65.5849	90.2993	128.58
	FBgn0031800	CG9497	12.4046	10.0774	18.3401
	FBgn0031801	CG9498	11.6346	11.3178	12.2741
	FBgn0031802	ppk7	0	0.213266	0
	FBgn0031803	ppk14	0	0	0
	FBgn0031804	CG9500	0	0	0
	FBgn0031805	CG9505	19.658	9.44181	9.42208
	FBgn0043854	slam	1.64997	0.254053	0.696803
	FBgn0259714	CG42368	1.98412	1.34395	1.84286
	FBgn0031808	CG9507	3.84497	4.00521	3.47757
	FBgn0259716	CG42370	15.2399	6.07996	14.5478
	FBgn0259715	CG42369	113.682	98.8397	133.752
	FBgn0031811	CG13982	0.789439	0.400985	0.806369
	FBgn0011722	Tig	65.2585	64.9092	39.951
	FBgn0263278	l(2)k11101	12.9797	10.0369	10.6955
	FBgn0031813	CG9527	15.6774	11.2262	28.9195
	FBgn0031814	retm	32.9128	29.9484	23.8989
	FBgn0031815	frj	21.3239	21.3355	22.8916
	FBgn0031816	CG16947	3.38614	3.34371	2.96881
	FBgn0031817	CG9531	3.707	5.01471	3.27078
	FBgn0259749	mmy	24.3906	28.5841	22.3729
	FBgn0031818	CG9536	11.7018	12.2945	14.86
	FBgn0086357	Sec61alpha	71.6303	54.8685	72.3067
	FBgn0031820	DLP	8.44624	5.77129	6.92594
	FBgn0031821	CG9542	6.79072	7.12312	7.15493
	FBgn0027496	epsilonCOP	25.6806	18.7063	20.308
	FBgn0031822	CG9548	9.53259	7.48195	13.4343
	FBgn0051638	CG31638	5.11902	4.51105	6.07574
	FBgn0031824	CG9547	6.6263	7.55957	8.28797
	FBgn0031826	CG9550	0.174799	0	0.162028
	FBgn0051637	CG31637	15.1628	12.5717	13.4996
	FBgn0000320	eya	0.901629	0.991029	1.06542
	FBgn0031829	osm-6	0.183619	0	0
	FBgn0031830	CoVb	1592.01	1918.32	1684.26
	FBgn0031831	CG11043	2.43509	1.36893	1.49838
	FBgn0031832	CG9596	1.80393	2.54305	4.04282
	FBgn0263916	Ent2	17.5362	9.89415	16.4671
	FBgn0031834	CG13766	2.95399	2.74221	2.47684
	FBgn0031835	CG11319	3.33344	3.34321	3.30119
	FBgn0031836	CG11050	132.048	102.715	129.583
	FBgn0031837	CG11320	0.337585	0	0.156478
	FBgn0085374	CG34345	0	0	0
	FBgn0051634	Oatp26F	0.0871352	0	0.0809003
	FBgn0051635	CG31635	30.4853	22.8681	24.0238
	FBgn0031842	Tango1	19.2581	18.2578	19.6517
	FBgn0051633	CG31633	3.96309	4.89914	2.96832
	FBgn0051636	CG31636	0	0.29379	5.1529
	FBgn0028467	CG11070	10.1949	6.78269	10.7666
	FBgn0031844	CG13771	0	0	0
	FBgn0000392	cup	1.28201	0.733477	4.48945
	FBgn0085339	CG34310	15.1772	18.6423	14.9016
	FBgn0000351	cort	0.275928	0	0.383926
	FBgn0263200	Galt	35.9299	48.7271	45.972
	FBgn0028990	Spn27A	28.5084	28.3688	23.5909
	FBgn0031848	CG11329	0.542675	0	0.7532
	FBgn0028703	Nhe3	38.6226	28.5015	27.8423
	FBgn0031849	CG11327	0.119443	0	0
	FBgn0031850	Tsp	34.9239	31.9399	24.0952
	FBgn0025595	GRHR	21.6461	12.2064	25.9411
	FBgn0031851	CG11188	3.57241	2.8066	4.37961
	FBgn0025777	homer	8.60597	7.93031	8.69774
	FBgn0046704	Liprin-alpha	6.84016	5.75119	6.70397
	FBgn0031853	TTLL3B	0	0	0
	FBgn0031854	TTLL3A	0.418664	0.236309	0.388832
	FBgn0031855	CG11221	1.95929	1.10558	0.95275
	FBgn0051910	CG31910	0	0	0
	FBgn0086034	snoRNA:Me28S-G2743	0	0	0
	FBgn0031856	CG11322	0.490595	0	0.227596
	FBgn0031857	CG11321	42.884	63.654	52.4932
	FBgn0031858	CG17378	2.74303	4.26316	2.45451
	FBgn0015776	nrv1	265.444	173.332	177.019
	FBgn0015777	nrv2	174.736	119.67	123.782
	FBgn0263585	CR43610	0	0	0
	FBgn0051631	tRNA:CR31631	0	0	0
	FBgn0042189	CG17376	0	0	0
	FBgn0031859	CG17377	0	0	0.338471
	FBgn0031860	CG11236	16.4047	15.9897	21.6611
	FBgn0031861	CG17375	0	0	0
	FBgn0051632	sens-2	0.918771	0.62237	2.04826
	FBgn0017551	Rca1	2.54434	1.91318	1.83549
	FBgn0086451	l(2)k09022	3.96371	1.79769	3.19079
	FBgn0031865	Nha1	4.66051	5.23489	9.04106
	FBgn0031866	neuroligin	2.40871	3.03257	2.61436
	FBgn0262205	mir-932	0	0	0
	FBgn0042092	CG13773	4.70834	3.61768	4.75765
	FBgn0031868	Rat1	4.12271	4.85049	4.34813
	FBgn0011737	wee	4.30512	4.31717	4.24249
	FBgn0028554	x16	4.38414	3.6913	6.37534
	FBgn0052829	CG32829	0	0	0
	FBgn0026196	nop5	21.6728	12.4944	20.1101
	FBgn0263467	snoRNA:nop5-x16-a	0	0	0
	FBgn0004838	Hrb27C	78.8058	72.7157	93.36
	FBgn0262877	CG43232	0	1.57222	0
	FBgn0031869	CG18304	19.7673	29.711	20.6688
	FBgn0031871	CG10158	7.5711	6.02588	5.9206
	FBgn0031872	ihog	0.883687	0.534456	1.05534
	FBgn0031873	Gas41	6.96433	5.39075	6.71015
	FBgn0020616	SA	7.10704	7.51064	7.92265
	FBgn0031874	CG13775	0.704665	0.993778	0.762856
	FBgn0031875	CG3430	1.08676	1.10361	1.00859
	FBgn0031876	Atac1	3.83731	1.62206	0.711166
	FBgn0031877	CG10399	7.59812	4.03645	5.22784
	FBgn0031878	sip2	0.211536	0	0.196326
	FBgn0021944	Coprox	8.47294	5.67864	10.5242
	FBgn0026170	smt3	58.933	48.0202	70.1119
	FBgn0016978	snRNP-U1-70K	4.44499	5.9602	6.98242
	FBgn0262616	CR43142	0	0	0
	FBgn0031879	uif	2.31307	6.50997	2.83942
	FBgn0263026	CG43321	0	0	0
	FBgn0263027	CG43322	12.4014	9.58734	10.5095
	FBgn0000053	ade3	30.6578	29.0545	38.666
	FBgn0003046	Pcp	0.704089	0	0.650512
	FBgn0051908	CG31908	11.509	11.286	11.751
	FBgn0031881	CG3476	12.788	9.5005	9.51553
	FBgn0031882	Rab30	5.73347	3.70856	4.31734
	FBgn0031883	CG11266	26.3159	28.2214	28.0121
	FBgn0262872	milt	31.3522	27.9629	30.3859
	FBgn0031885	Mnn1	15.2428	11.932	13.3173
	FBgn0051907	CG31907	0.150328	0	0.139408
	FBgn0040954	CG13779	52.052	53.7084	57.2964
	FBgn0031886	Nuf2	0.348667	0.58966	0.484793
	FBgn0031887	CG11289	0.14554	0	0
	FBgn0031888	Pvf2	2.9017	2.10492	0.865688
	FBgn0085407	Pvf3	3.51415	1.94846	2.33836
	FBgn0031893	CG4495	27.8244	22.1805	27.2215
	FBgn0031894	CG4496	0.852239	0.480891	1.05486
	FBgn0031895	CG4497	6.74352	6.19118	6.03642
	FBgn0031896	CG4502	17.5453	10.116	15.1637
	FBgn0031897	CG13784	33.1128	22.5923	29.9758
	FBgn0263133	ico	5.03821	4.83356	6.08138
	FBgn0259111	Ndae1	11.616	7.38421	13.831
	FBgn0264343	CG43799	0	0.480176	0.262998
	FBgn0264344	CG43800	0.861352	1.55059	1.48463
	FBgn0031900	CG13786	0	0	0
	FBgn0010453	Wnt4	0.310909	0.631816	0.462073
	FBgn0051909	CG31909	0.751554	0	0.23081
	FBgn0004009	wg	0.499437	0.120812	0.0662623
	FBgn0031902	Wnt6	4.52952	2.69312	6.24721
	FBgn0031903	Wnt10	0	0	0
	FBgn0002938	ninaC	0	0.0869354	0
	FBgn0031904	CG5149	11.6982	9.41862	8.11554
	FBgn0031905	CG5155	0	0	0
	FBgn0031906	CG5160	1.42509	0.986656	1.98122
	FBgn0031907	CG5171	148.258	81.5209	104.474
	FBgn0031908	CG5177	234.763	215.856	201.184
	FBgn0031909	CG5181	3.73875	3.79318	3.8113
	FBgn0031910	CG15818	0.169667	0.286955	0.943716
	FBgn0028387	chm	4.39583	1.78914	3.02989
	FBgn0264439	CR43857	0	0	0
	FBgn0262453	mir-275	0	0	0
	FBgn0262458	mir-305	0	0	0
	FBgn0031912	CG5261	566.134	945.178	696.277
	FBgn0031913	CG5958	59.66	57.1717	45.7375
	FBgn0031914	CG5973	38.452	47.3167	45.4967
	FBgn0025697	santa-maria	18.391	17.5824	26.1837
	FBgn0041247	Gr28a	0	0	0
	FBgn0045495	Gr28b	0.276149	0.700836	0.384222
	FBgn0031918	CG6055	0.676647	1.14364	1.04439
	FBgn0260486	CG42533	9.166	6.41659	6.61444
	FBgn0031920	CG6441	0.626932	0.636525	0.116327
	FBgn0011283	Pbprp5	0.953483	0	0
	FBgn0085403	Rapgap1	8.55567	8.59914	6.66837
	FBgn0031923	CG13791	1.192	0	1.08448
	FBgn0083141	Spn7	0.182256	0	0
	FBgn0031925	Cyp4d21	0	0.20031	0.219662
	FBgn0031926	CG6739	0.772373	2.35395	1.64965
	FBgn0264087	Slob	3.19407	2.87988	2.49408
	FBgn0040299	Myo28B1	0.327779	0	1.81632
	FBgn0031929	CG18585	0	0	23.706
	FBgn0031930	CG7025	0.165523	0.839877	11.3557
	FBgn0262880	CG43235	0.762856	0.643467	0
	FBgn0041182	TepII	97.6627	29.7835	25.7443
	FBgn0041181	TepIII	14.5005	15.9097	11.905
	FBgn0031934	Ntl	0.336221	0.189636	0.103982
	FBgn0012018	tRNA:Y1:28C	0	0	0
	FBgn0053296	CG33296	7.90522	13.1849	15.3096
	FBgn0031935	CG13793	0.890081	1.69474	3.09758
	FBgn0031936	CG13794	15.4954	14.3626	16.3874
	FBgn0031937	CG13795	20.1137	11.4833	12.2864
	FBgn0031939	CG13796	18.6755	18.8518	10.2514
	FBgn0260479	CG31904	22.6182	129.378	56.7806
	FBgn0014454	Acp1	132.953	1049.56	399.015
	FBgn0031940	CG7214	29.7472	377.095	160.159
	FBgn0031941	CG7211	0	0	0
	FBgn0031942	CG7203	251.106	1396.55	476.009
	FBgn0031944	CG7196	0.711528	0	0.593417
	FBgn0031943	CG14538	0	0	0
	FBgn0031945	CG7191	2.28936	1.82286	2.62336
	FBgn0020880	CG7179	0.190673	0	0
	FBgn0003961	Uro	1.07265	0	2.81691
	FBgn0031946	CG7164	0	0	0
	FBgn0031947	CG7154	5.42351	4.71575	5.30899
	FBgn0031948	CG7149	9.87987	9.37266	9.56866
	FBgn0025687	LKR	7.85977	6.01099	6.24083
	FBgn0031950	Herp	41.7013	23.5495	31.7306
	FBgn0031951	r2d2	3.95336	6.91229	5.25667
	FBgn0031952	cdc14	13.8108	11.3454	12.3464
	FBgn0261800	LanB1	14.6492	10.385	9.11851
	FBgn0027515	CG7115	95.3701	69.6322	73.9538
	FBgn0020618	Rack1	727.273	786.284	1004.34
	FBgn0004177	mts	87.3713	53.8109	64.0866
	FBgn0262546	CG43100	0	0	0
	FBgn0031954	CG14537	0	0	0
	FBgn0031955	CG14535	0.902532	0.611554	0.738097
	FBgn0040099	lectin-28C	81.6963	67.3788	72.8255
	FBgn0031957	TwdlE	7.81246	6.46624	5.08539
	FBgn0045038	Proct	43.6876	34.7749	33.7212
	FBgn0011861	tRNA:G3:28D	0	0	0
	FBgn0031959	spz3	3.375	4.59912	2.44588
	FBgn0031961	CG7102	0.311719	0	0.0964413
	FBgn0261790	SmE	24.3259	12.9791	23.4669
	FBgn0083968	CG34132	17.4231	19.5609	20.9075
	FBgn0051902	Spn28Da	0	0	0
	FBgn0053121	Spn28Db	0	0	0
	FBgn0085450	Snoo	8.85217	6.08018	6.28753
	FBgn0031968	CG7231	8.97956	11.1733	16.0693
	FBgn0031969	pes	19.6803	15.0239	21.6463
	FBgn0031970	CG7227	13.0982	9.98624	6.77559
	FBgn0031971	CG7224	105.337	131.636	109.977
	FBgn0031972	Wwox	5.03424	2.19007	3.60189
	FBgn0031973	Spn28D	21.6227	19.4897	15.2662
	FBgn0031974	CG12560	8.21609	8.57524	9.39613
	FBgn0054010	CG34010	0.564522	0.476739	1.04448
	FBgn0031975	Tg	17.2783	16.9867	16.1872
	FBgn0031976	CG7367	0.356575	0	0.282215
	FBgn0044323	Cka	22.9451	17.563	20.4258
	FBgn0031977	baf	54.4069	26.1103	36.7159
	FBgn0031979	CG7429	7.98504	4.04036	5.8968
	FBgn0031980	RpL36A	1237.58	1210.45	1362.56
	FBgn0065055	snoRNA:Psi28S-2648	0	0	0
	FBgn0031981	CG7466	1.99316	2.3176	2.32517
	FBgn0011230	poe	49.7801	41.4054	47.3979
	FBgn0013531	MED20	4.72054	3.03942	4.3716
	FBgn0010287	Trf	1.19794	0.40487	2.43998
	FBgn0020240	Mcr	8.10606	7.00185	6.87864
	FBgn0261822	Bsg	125.565	99.6884	115.445
	FBgn0031985	mon2	10.1145	7.08997	9.59432
	FBgn0031986	CG8673	0	0	0.293598
	FBgn0031987	CG12375	19.4878	16.1377	21.9251
	FBgn0031988	CG8668	21.6629	15.5093	12.0844
	FBgn0031990	CG8552	25.6095	22.1014	18.896
	FBgn0263561	mir-4984	0	0	0
	FBgn0261830	CG42762	0	0	0
	FBgn0261831	CG42763	0	0	0.379259
	FBgn0263256	CG43394	4.5053	4.70679	3.6249
	FBgn0051606	CG31606	0.767324	0.647218	0.354261
	FBgn0261064	Rbsn-5	7.03824	2.18371	3.15664
	FBgn0031992	CG8498	30.6615	24.1339	22.7778
	FBgn0031993	Piezo	12.8368	10.2406	8.84822
	FBgn0013442	fos28F	0.262293	0	0.242736
	FBgn0083970	CG34134	32.3237	38.9904	25.2364
	FBgn0031995	CG8475	281.044	175.663	224.258
	FBgn0031996	CG8460	3.26915	3.31767	4.09176
	FBgn0031997	CG8455	2.95978	3.09558	2.61089
	FBgn0031998	CG8451	8.51226	7.33961	7.75802
	FBgn0031999	CG8419	0.258205	0.218624	0.299787
	FBgn0003607	Su(var)205	26.0735	22.6884	28.0655
	FBgn0015299	Ssb-c31a	15.7968	16.8485	15.5178
	FBgn0032000	CG8372	26.369	16.1529	24.5214
	FBgn0032001	CG8360	94.536	62.1525	65.8719
	FBgn0032002	CG8353	11.3523	12.3737	11.7157
	FBgn0032003	CG8349	0	0	0
	FBgn0032004	CG8292	1.87708	0	0.966026
	FBgn0032005	Snx6	31.5482	22.2463	18.405
	FBgn0032006	Pvr	18.7546	14.679	11.8935
	FBgn0028987	Spn2	0	0	0.34681
	FBgn0262943	CR43262	0	0	0
	FBgn0032008	CG14277	0	0.642226	0
	FBgn0262359	CG43057	0.64382	1.08271	0
	FBgn0032010	CG8086	41.0992	38.471	34.6155
	FBgn0262374	mir-2b-1	0	0	0
	FBgn0003502	Btk29A	7.69511	8.84875	7.35083
	FBgn0011902	tRNA:K5:29A	0	0	0
	FBgn0264083	CR43752	0	0	0
	FBgn0261020	wol	14.2495	10.4908	16.163
	FBgn0032013	Scgalpha	3.7628	2.88424	2.92808
	FBgn0032014	CG7840	5.73777	3.34514	9.16603
	FBgn0032015	CG7830	21.2452	16.5814	20.7003
	FBgn0032016	CG7818	4.26437	2.40442	4.97916
	FBgn0032017	CG7810	4.58497	2.58482	3.93554
	FBgn0032018	CG7806	6.66027	4.98338	6.79652
	FBgn0262598	mtsh	0.168007	0.142168	0.312065
	FBgn0032020	CG7787	11.1099	6.4083	8.02334
	FBgn0032021	CG7781	33.8644	32.0379	30.6598
	FBgn0032022	CG14275	26.6717	17.4372	17.2422
	FBgn0032023	CG14274	3.26335	2.30061	2.27033
	FBgn0032024	CG14273	0.656343	0.369802	0
	FBgn0032025	CG7778	30.7331	32.4812	26.6184
	FBgn0051901	Mur29B	8.67684	2.31864	11.9243
	FBgn0032026	CG7627	18.5792	5.75164	11.3142
	FBgn0010265	RpS13	899.137	974.04	1058.56
	FBgn0261437	CSN8	9.80206	6.61357	12.6693
	FBgn0260439	Pp2A-29B	59.4091	54.9652	59.5783
	FBgn0032029	CG17292	22.0246	24.6096	22.8838
	FBgn0032030	Wdr82	13.3665	11.1182	9.43343
	FBgn0032031	CG13390	6.26058	6.22739	7.33804
	FBgn0032032	CG17294	11.1075	4.69298	9.42805
	FBgn0027094	Aats-ala	16.1664	13.3542	18.0675
	FBgn0032033	CG13392	6.34747	8.4161	6.75525
	FBgn0032034	Rcd4	10.2413	7.67704	7.70409
	FBgn0263852	l(2)k12914	27.5938	20.9534	29.3907
	FBgn0032036	CG13384	18.027	13.456	10.1568
	FBgn0262001	CG42819	0	0	0
	FBgn0041717	snRNA:U6atac:29B	0	0	0
	FBgn0262002	CG42820	0	0	0
	FBgn0015583	Acp29AB	0	0	0
	FBgn0040098	lectin-29Ca	0	0	0
	FBgn0040958	Peritrophin-15b	0	0	2.23059
	FBgn0040959	Peritrophin-15a	0.989918	3.31545	28.9264
	FBgn0032039	CG13385	0	0	0
	FBgn0032040	CG13386	0.283892	0	0
	FBgn0051898	CG31898	1.14489	0.773983	0.424073
	FBgn0001084	fy	2.12946	1.20089	0.921699
	FBgn0020497	emb	13.2603	10.6148	14.7683
	FBgn0014417	CG13397	6.8038	3.19207	9.36218
	FBgn0032042	CG13398	5.41726	5.86141	6.01019
	FBgn0027932	Akap200	70.0365	42.6069	43.907
	FBgn0001137	grk	28.9354	19.457	19.9289
	FBgn0027490	D12	1.92076	1.08422	1.54621
	FBgn0043002	Chrac-14	12.9406	3.89459	12.3578
	FBgn0002887	mus201	1.97777	0.814745	1.58908
	FBgn0051897	CG31897	0.257613	0.109062	0
	FBgn0027780	U26	4.10622	2.96563	3.25337
	FBgn0026718	fu12	6.72325	4.8148	8.67302
	FBgn0029173	fu2	3.77649	3.1046	3.50492
	FBgn0262029	d	1.11451	1.88414	1.25245
	FBgn0053194	CheA29a	0.375595	0	0
	FBgn0051896	tRNA:CR31896	0	0	0
	FBgn0051892	tRNA:CR31892	0	0	0
	FBgn0264340	CG43796	0	0	0
	FBgn0263489	unsRNA:d-a	4.11081	0	0
	FBgn0032047	CG13088	1.21752	0.772352	1.12904
	FBgn0263314	CG43400	0	0	0
	FBgn0032048	Dh31	8.50984	9.09945	7.72255
	FBgn0032049	Bace	17.8093	11.5328	4.38927
	FBgn0032050	CG13096	8.39533	3.99205	8.14385
	FBgn0032051	CG13097	5.16423	4.65365	6.57386
	FBgn0032052	CG13089	4.48239	4.5497	5.12679
	FBgn0032053	mRpL51	6.7588	12.1088	10.9137
	FBgn0032054	CG13090	2.1403	1.93119	3.83786
	FBgn0032055	CG13091	0.758107	7.27376	8.79214
	FBgn0016122	Acer	55.1882	40.6085	46.4642
	FBgn0250903	lmg	5.64305	5.07736	5.77665
	FBgn0028394	CG17834	6.73468	4.06247	3.96277
	FBgn0051604	tRNA:CR31604	0	0	0
	FBgn0051603	tRNA:CR31603	0	0	0
	FBgn0011259	Sema-1a	2.7948	2.49513	2.75622
	FBgn0051895	tRNA:CR31895	0	0	0
	FBgn0264437	CR43855	0	0	0.980941
	FBgn0051602	tRNA:CR31602	0	0	0
	FBgn0001114	Glt	163.756	149.346	191.178
	FBgn0032057	CG9287	0	0	0
	FBgn0051889	tRNA:CR31889	0	0	0
	FBgn0032058	CG9289	0.316573	0	0
	FBgn0051890	tRNA:CR31890	0	0	0
	FBgn0051888	tRNA:CR31888	0	0	0
	FBgn0032059	PrBP	15.082	6.1196	4.47146
	FBgn0260861	Trs23	13.7055	7.16126	11.7637
	FBgn0004914	Hnf4	23.9001	20.2467	20.87
	FBgn0032061	CG9314	0	0	0.332894
	FBgn0003209	raw	28.8022	17.25	15.0854
	FBgn0032065	CG12438	0	0	0
	FBgn0032066	CG9463	0	0	0.619704
	FBgn0032067	CG9465	0	0	0.0657852
	FBgn0032068	CG9466	0.0676863	0.114617	21.4372
	FBgn0032069	CG9468	0.131171	0.222124	34.418
	FBgn0261627	CG42710	0	0	0
	FBgn0261629	CG42712	0	0	0
	FBgn0029123	SoxN	0.70846	0.771377	0.98732
	FBgn0052986	CG32986	0	0	0
	FBgn0052987	CG32987	0	0	0
	FBgn0052988	CG32988	0	0	0
	FBgn0052983	CG32983	0	0	0
	FBgn0032072	CG9483	0	0	0
	FBgn0261630	CG42713	0	0	0
	FBgn0085427	CG34398	31.953	32.251	33.4886
	FBgn0032074	Tsp29Fa	6.63054	4.97947	37.2989
	FBgn0032075	Tsp29Fb	23.0831	16.329	68.5229
	FBgn0032076	CG9510	8.45231	12.1418	29.4576
	FBgn0032077	CG9515	5.27441	4.18856	4.59463
	FBgn0032078	C1GalTA	10.1641	5.96154	9.80652
	FBgn0032079	CG31886	5.06345	5.05235	7.40972
	FBgn0032080	CG9525	0.103032	0.174397	0
	FBgn0052985	CG32985	0.655316	0.369709	0.253407
	FBgn0052984	CG32984	13.8604	11.0724	4.68213
	FBgn0032082	CG18088	2.08916	2.47528	0.869852
	FBgn0032083	CG9541	0.507421	0.632361	0.653883
	FBgn0032084	CG13101	4.3024	4.84364	4.57828
	FBgn0040963	CG18662	0	0	0
	FBgn0011705	rost	34.6039	19.1503	26.5364
	FBgn0032085	CG9555	0.36283	0.30678	4.2035
	FBgn0013746	alien	20.1602	16.3169	16.9357
	FBgn0032086	CG17906	0.295415	0	0.546443
	FBgn0040964	CG18661	12.9245	5.82086	5.66329
	FBgn0015316	Try29F	1.78831	0.431632	2.36454
	FBgn0032087	CG9568	3.28753	2.07903	52.3377
	FBgn0032088	CG13102	0.481412	0.811171	23.0735
	FBgn0032089	Rcd-1r	0	0	0.711859
	FBgn0032090	CG9582	0	0	0
	FBgn0051708	CG31708	0.578442	0.516814	0.510286
	FBgn0032094	CG12439	0	0	0
	FBgn0032095	Toll-4	0.0611181	0	0.0567722
	FBgn0051609	CG31609	0	0	0
	FBgn0032096	Or30a	0	0	0
	FBgn0052982	CG32982	31.2419	17.228	9.46288
	FBgn0032100	CG13108	1.83183	2.32195	3.18054
	FBgn0032101	CG9586	31.7496	38.2171	39.9903
	FBgn0041092	tai	8.95724	7.30463	8.29217
	FBgn0032104	aust	0.2706	0	0
	FBgn0051885	tRNA:CR31885	0	0	0
	FBgn0263985	CR43734	0	0	0
	FBgn0032105	borr	0.349751	0.295729	0.972881
	FBgn0028433	Ggamma30A	4.47354	5.1952	3.01783
	FBgn0263984	CG43733	22.1654	25.1137	24.5809
	FBgn0040097	lectin-30A	0	0	0
	FBgn0262033	CG42844	0	0	0
	FBgn0032109	CG17005	0.112021	0	0
	FBgn0010314	Cks30A	1.00239	0.33894	0.742971
	FBgn0026439	Eaat1	102.758	82.1304	99.0109
	FBgn0032110	CG3748	0	0	0
	FBgn0263082	CG43350	0	0	0
	FBgn0032111	CG13110	0	0	0
	FBgn0263323	CG43404	0	0	0
	FBgn0085210	CG34181	0	0	0
	FBgn0085395	Shawl	0.84422	0.629262	0.776084
	FBgn0264447	CR43865	0.364512	0.3082	0.168917
	FBgn0012036	Aldh	274.762	199.101	328.565
	FBgn0032115	CG4438	0	0	0
	FBgn0032116	CG3759	4.5349	3.04512	3.83993
	FBgn0000640	Fbp2	0	0	0.482906
	FBgn0262036	CG42847	0	0	0
	FBgn0032117	FucTB	2.0682	1.99933	1.50704
	FBgn0011232	scat	4.6881	3.13661	4.19372
	FBgn0032119	CG3769	0.167927	0.284018	0.155678
	FBgn0085211	RpS28-like	0	0	0
	FBgn0002973	numb	7.75548	7.94175	8.27049
	FBgn0053723	CG33723	0	0	0
	FBgn0264269	CR43769	0	0	0
	FBgn0004868	Gdi	67.2996	62.7041	61.2141
	FBgn0032120	CG33298	5.54596	4.67483	5.81898
	FBgn0032123	Oatp30B	11.0911	8.61232	8.56675
	FBgn0032122	CG31883	0	0	0.187458
	FBgn0032124	CG17855	1.34392	1.36434	2.49333
	FBgn0032125	Cpr30B	0	0	0
	FBgn0032126	CG13113	0	0	0
	FBgn0032127	CG13114	0.574921	0	0.133306
	FBgn0032129	jp	149.222	117.371	89.3137
	FBgn0032130	CG3838	9.69953	8.9604	10.2751
	FBgn0028479	Mtpalpha	38.1367	33.3871	41.312
	FBgn0051709	CG31709	0	0	0
	FBgn0014179	gcm	0	0	0
	FBgn0263612	CR43621	0	0	0
	FBgn0032131	CG3841	0.108892	0.184303	2.02848
	FBgn0032132	CG4382	0	0.210436	0
	FBgn0019809	gcm2	0	0	0
	FBgn0040070	Trx-2	394.389	129.298	130.646
	FBgn0032135	GlcAT-S	22.0306	15.7355	12.7778
	FBgn0051882	CG31882	0	0	0
	FBgn0032136	CG15828	48.3148	28.5213	33.9247
	FBgn0053299	CG33299	0.376279	0	0
	FBgn0000273	Pka-C1	31.6244	28.4888	30.5801
	FBgn0015393	hoip	17.2535	13.424	20.8107
	FBgn0011207	pelo	7.66879	5.43772	8.36832
	FBgn0051710	CG31710	10.2645	10.7514	4.57803
	FBgn0032138	CG4364	70.2099	59.4218	71.5941
	FBgn0028704	Nckx30C	10.9532	11.8886	9.6061
	FBgn0032139	CG13116	14.2162	11.028	9.49485
	FBgn0032140	CG13117	27.8473	12.0627	12.8584
	FBgn0015035	Cyp4e3	7.419	5.46756	2.10961
	FBgn0022720	zf30C	7.60303	7.55922	6.67259
	FBgn0011291	Taf11	8.68455	6.06835	9.69319
	FBgn0025117	und	48.4797	38.85	55.4056
	FBgn0032142	CG13120	0	0	0
	FBgn0032143	CG4017	0	0	0.125523
	FBgn0032144	CG17633	7.6592	1.12646	163.162
	FBgn0032145	CG13121	0	0	0
	FBgn0065108	ppk16	0.273841	0	0
	FBgn0065109	ppk11	0.141556	0	0
	FBgn0032147	IP3K1	5.72999	3.87946	4.10674
	FBgn0032149	CG4036	5.98245	0.808756	3.10175
	FBgn0042174	CR18854	79.9507	72.0676	89.7615
	FBgn0032150	CG13123	2.32133	0.797109	2.40206
	FBgn0032151	nAcRalpha-30D	2.1088	1.59921	1.64112
	FBgn0264266	CR43766	0	0	0
	FBgn0029174	FKBP59	25.833	15.4832	22.0411
	FBgn0085212	CG34183	5.83909	1.78781	1.46646
	FBgn0032153	CG4537	6.82466	1.43102	8.59058
	FBgn0032154	CG5924	1.75728	0	1.83471
	FBgn0063449	Uhg2	22.3922	10.5118	13.1091
	FBgn0063391	snoRNA:U14:30Eb	0	0	0
	FBgn0063392	snoRNA:U14:30Ea	0	0	0
	FBgn0063389	snoRNA:Me18S-G1620	0	0	0
	FBgn0025881	snoRNA:Me18S-A1576	0	0	0
	FBgn0010520	Bka	9.47906	6.62134	6.64691
	FBgn0004867	RpS2	580.995	626.338	941.117
	FBgn0053300	Muc30E	0.409609	0.0490459	0.125562
	FBgn0032156	CG13124	223.077	149.533	149.609
	FBgn0032157	Etl1	4.51942	4.22628	5.13732
	FBgn0024285	Srp54	8.67296	7.93097	10.6415
	FBgn0040064	yip2	77.7585	54.1262	50.1417
	FBgn0025700	CG5885	55.667	41.9963	53.2592
	FBgn0032160	CG4598	24.4995	19.1085	23.5559
	FBgn0032161	CG4594	3.34413	0.708163	2.91658
	FBgn0032162	CG4592	10.1839	7.43925	9.01005
	FBgn0032163	TbCMF46	0	0	0
	FBgn0259712	CG42366	0.08248	0.139639	0.0714434
	FBgn0259713	CG42367	0	0	0
	FBgn0051876	Cpr30F	0	0	0
	FBgn0051712	CG31712	21.127	21.7394	27.1995
	FBgn0051713	Apf	18.5389	19.4135	12.0031
	FBgn0032166	CG4619	8.48459	9.6362	12.4325
	FBgn0032167	CG5853	23.3773	19.6378	20.7993
	FBgn0262428	mir-87	0	0	0
	FBgn0032168	CG13126	4.94881	3.84725	4.46666
	FBgn0032169	CG4709	4.89841	3.91374	3.02919
	FBgn0032171	CG5846	13.0231	6.5524	10.2543
	FBgn0032170	CG4658	67.4689	43.2636	48.8919
	FBgn0263766	CR43683	15.7343	14.0176	18.1197
	FBgn0032172	CG5850	16.2582	11.1907	14.2389
	FBgn0015664	Dref	9.20756	5.97575	7.33925
	FBgn0011272	RpL13	413.052	495.179	773.528
	FBgn0040965	CG13130	0.879634	0	0
	FBgn0000180	bib	0.440288	0.745606	0.642663
	FBgn0051875	CG31875	0.925621	0.391082	1.07137
	FBgn0051755	SoYb	0.131776	0.148781	0.694042
	FBgn0043456	CG4747	18.3251	16.1277	21.9005
	FBgn0011584	Trp1	56.6393	45.4746	44.5666
	FBgn0032175	CG13131	0	0	0.0805786
	FBgn0032176	CG13127	0	0	0
	FBgn0027600	obst-B	5.20182	14.2066	9.8244
	FBgn0053301	CG33301	2.35208	1.06097	3.05334
	FBgn0053302	Cpr31A	0	0	0
	FBgn0011823	Pen	2.77437	0.967071	8.3345
	FBgn0032178	Spn31A	52.1229	39.2748	27.7008
	FBgn0032180	CG31714	0.6695	0.425269	0.777646
	FBgn0032181	CG13133	0.749175	2.2169	2.08284
	FBgn0083945	CG34109	0.164565	0.417927	0
	FBgn0262032	CG42843	0.491208	1.45467	0.569698
	FBgn0032184	CG13135	0	0	0
	FBgn0032187	CG4839	0.682111	0.888966	1.89716
	FBgn0032188	CG13137	0	0	0
	FBgn0028675	Sur	1.1675	0.988965	1.05932
	FBgn0051874	CG31874	0.269152	0.227702	0
	FBgn0032189	Ripalpha	15.1958	5.44184	8.94783
	FBgn0005593	RpL7	835.812	822.179	969.114
	FBgn0085188	CG34159	14.1775	10.6938	18.0436
	FBgn0032191	CG5734	8.56388	6.67825	8.03908
	FBgn0032192	CG5731	0.864476	1.88085	0.687496
	FBgn0032193	CG5727	7.19475	3.69706	5.49521
	FBgn0032194	CG4901	5.41055	4.33846	5.72762
	FBgn0024320	Npc1a	21.2399	13.3975	11.9783
	FBgn0250843	Pros35	24.6149	18.4896	29.9701
	FBgn0032195	CG4908	6.96956	5.326	6.92294
	FBgn0032196	CG5708	20.461	9.72805	14.0887
	FBgn0032197	CG5694	7.37983	5.08516	5.46825
	FBgn0032198	eEF1delta	138.546	129.657	119.627
	FBgn0051720	CG31720	0.220737	0	0.615556
	FBgn0004419	me31B	36.0869	25.1087	46.2834
	FBgn0024248	chico	29.7265	19.5753	19.4214
	FBgn0000229	bsk	24.8674	16.9246	20.324
	FBgn0051717	CG31717	31.1117	12.1686	14.9909
	FBgn0010407	Ror	1.02532	1.10453	0.605721
	FBgn0032200	CG5676	124.156	60.197	80.3076
	FBgn0026379	Pten	9.88728	4.93441	9.28523
	FBgn0011305	Rsf1	12.459	16.2106	19.1478
	FBgn0032202	CG18619	62.6903	68.1044	70.6229
	FBgn0259482	Mob3	13.3769	11.5211	9.46671
	FBgn0032204	CG4953	8.93668	6.51116	8.75218
	FBgn0032205	CG4957	8.16212	7.13066	7.81125
	FBgn0260750	Mulk	4.83841	6.1371	6.40725
	FBgn0003751	trk	0.273234	0	0.758431
	FBgn0260749	Utx	8.51362	8.08764	5.89917
	FBgn0054043	CG34043	2.21585	1.24898	2.05358
	FBgn0032208	CG5604	43.4028	35.4855	40.3444
	FBgn0032209	Hand	3.79784	6.39462	4.49558
	FBgn0032210	CYLD	31.4075	17.6533	21.3509
	FBgn0032211	CG13138	0.161041	0	0
	FBgn0005322	nmd	32.8899	20.7857	28.8833
	FBgn0032213	CG5390	76.6006	59.5761	77.6163
	FBgn0032214	CG4968	12.8906	12.9087	13.0397
	FBgn0027491	Cdk5alpha	8.80969	6.08156	7.52864
	FBgn0032215	CG5385	12.1993	6.44109	8.939
	FBgn0032216	CG5384	18.2082	16.2358	21.6015
	FBgn0032217	CG4972	10.5572	6.93965	13.2239
	FBgn0032218	CG5381	81.8314	45.0934	54.4569
	FBgn0032219	CG4995	0.907076	0.31874	0.524148
	FBgn0011703	RnrL	1.30234	1.10248	1.81392
	FBgn0032221	CG5375	4.55022	2.80066	2.59161
	FBgn0032222	CG5037	129.286	136.757	120.173
	FBgn0032223	GATAd	12.8951	7.92753	8.26654
	FBgn0019932	SamDC	17.7769	16.5957	18.3627
	FBgn0051715	CG31715	20.7252	16.6692	18.2377
	FBgn0032224	Sps2	150.376	106.321	83.6697
	FBgn0032225	CG5022	1.73701	1.55656	1.32776
	FBgn0085396	CG34367	0.455541	0.553604	0.922473
	FBgn0032228	CG5367	0.316387	0	0.293362
	FBgn0032229	CG5045	32.5136	28.2829	27.1924
	FBgn0027568	Cand1	7.99662	5.70715	7.70809
	FBgn0003087	pim	0.510899	0	0.709322
	FBgn0032230	lft	11.7743	6.53839	9.12207
	FBgn0032231	CG5056	14.2137	10.0405	13.3407
	FBgn0041723	rho-5	2.17269	2.94416	1.92028
	FBgn0053303	CG33303	21.6374	12.7751	22.7604
	FBgn0032233	dpr19	1.68624	2.1103	2.36816
	FBgn0032234	gny	2.16904	3.18144	1.74605
	FBgn0032235	CG5096	1.81709	1.7898	21.1721
	FBgn0004106	cdc2	0.641348	0	1.98021
	FBgn0032236	mRpS7	50.5241	75.2361	70.1947
	FBgn0000413	da	12.4298	12.4464	11.7319
	FBgn0262782	Mdh1	137.292	153.748	239.429
	FBgn0051716	Cnot4	49.6116	39.6023	40.2108
	FBgn0032240	CG17768	8.53466	11.7151	15.7476
	FBgn0067622	LSm-4	1.06868	1.29658	1.76714
	FBgn0051718	Ir31a	0	0	0
	FBgn0025366	Ip259	125.707	107.564	160.046
	FBgn0003942	RpS27A	1205.08	1240.12	1581.11
	FBgn0032242	CG5355	18.062	12.4687	19.1301
	FBgn0032243	Klp31E	5.68785	4.33882	4.56004
	FBgn0032244	RfC3	0.809345	1.02622	1.12475
	FBgn0005683	pie	0.747479	0.361443	0.495523
	FBgn0032246	CG5168	39.5672	19.3547	21.8465
	FBgn0262601	SmB	6.08888	5.95124	8.29513
	FBgn0022268	KdelR	54.7359	32.7111	37.6374
	FBgn0032247	CG5188	8.63825	6.36438	7.79508
	FBgn0032248	CG5343	12.3417	8.93686	9.09231
	FBgn0004915	TfIIB	21.2705	16.7905	16.3626
	FBgn0032249	CG5337	5.53602	3.65219	3.73916
	FBgn0032250	holn1	6.26429	4.17265	6.33272
	FBgn0027052	CHIP	28.5715	22.0714	23.5407
	FBgn0032251	CG13142	2.94922	1.91713	2.30421
	FBgn0032252	CG6232	1.0101	1.59641	1.3001
	FBgn0065110	ppk10	0	0	0
	FBgn0032253	CG5322	6.27376	3.81005	9.0577
	FBgn0027611	CG6206	75.1045	60.9565	97.4118
	FBgn0051719	RluA-1	11.2012	11.7369	9.68549
	FBgn0032256	RluA-2	3.39977	1.47071	2.5369
	FBgn0026431	Grip75	5.93021	1.84033	3.4863
	FBgn0032258	CG7456	8.23945	7.83885	9.10848
	FBgn0032259	CG6144	2.37281	2.72047	3.25392
	FBgn0032260	CG13144	29.8959	27.7207	28.5275
	FBgn0086347	Myo31DF	30.5981	17.2132	13.9697
	FBgn0032261	CG6094	5.79779	8.63433	10.4002
	FBgn0032262	CG7384	7.65055	3.94851	6.66925
	FBgn0021953	Fatp	29.7634	29.3356	40.6975
	FBgn0010398	Lrr47	2.20454	1.16559	1.53038
	FBgn0032264	Lip4	19.6954	12.2952	3.99852
	FBgn0032265	CG18301	0	0.275102	0
	FBgn0032266	CG18302	1.3886	0.671574	1.01275
	FBgn0051721	Trim9	0.660484	1.2303	0.85885
	FBgn0032268	CG6138	0	0	0
	FBgn0032269	w-cup	0	0	0
	FBgn0250826	CG34160	0	0	0
	FBgn0085190	CG34161	0	0	0
	FBgn0032271	CG7329	0	0	0
	FBgn0051872	CG31872	0	0	0.0573243
	FBgn0043825	CG18284	0	0	0
	FBgn0032275	CG17097	0	0	0
	FBgn0032276	CG17098	0	0	0
	FBgn0051871	CG31871	0.363028	0.307282	0
	FBgn0040496	CG17104	2.07081	1.6491	2.14745
	FBgn0032280	CG17105	0	0	0
	FBgn0032281	CG17107	0.79783	4.01772	5.84896
	FBgn0032282	CG7299	0	0	0.560799
	FBgn0032283	CG7296	2.25773	4.5667	3.74779
	FBgn0032284	CG7294	0	0	0.48493
	FBgn0032285	CG17108	545.051	469.232	488.115
	FBgn0032286	CG7300	13.7646	4.81013	8.98276
	FBgn0023496	Lip1	0.137207	0	0.381814
	FBgn0024740	Lip2	0.158577	2.4141	0.147035
	FBgn0032287	CG6415	22.4079	19.4016	28.2459
	FBgn0032289	CG6431	0	0	0
	FBgn0032290	CG6443	11.8957	7.13707	8.88958
	FBgn0032291	CG17118	0.240761	0	0.222899
	FBgn0032292	CG6750	14.7846	11.8552	20.8757
	FBgn0032293	Dpy-30L1	12.3998	9.19154	12.7971
	FBgn0027868	Nup107	4.60887	5.33246	6.06321
	FBgn0032294	Vha16-5	0.435622	0	0.201737
	FBgn0032295	CG12299	2.18535	1.90327	1.91392
	FBgn0032296	CG6729	5.49485	4.59336	5.16794
	FBgn0263528	mir-4970	0	0	0
	FBgn0032297	CG17124	76.7244	40.9509	47.2432
	FBgn0027550	CG6495	6.5822	5.91604	5.28188
	FBgn0015320	UbcD2	13.2018	8.09774	9.68174
	FBgn0032298	CG6724	4.15299	3.14963	6.64107
	FBgn0032299	CG17127	2.81487	2.38015	1.93795
	FBgn0051869	CG31869	5.1139	4.95981	3.80738
	FBgn0051870	CG31870	0	0	0
	FBgn0011676	Nos	1.02392	1.029	1.24322
	FBgn0032305	CG6700	24.3586	26.5325	25.8702
	FBgn0263560	mir-4987	0	0	3.96218e-60
	FBgn0032303	CG6508	0	0	0
	FBgn0032304	CG17134	0	0	0
	FBgn0260453	CG17140	0.893055	0	0
	FBgn0260454	CG17139	1.4461e-06	0	0
	FBgn0069354	Porin2	22.538	10.6298	11.8404
	FBgn0004363	porin	1751.26	1805.1	1770.07
	FBgn0027453	Dnz1	6.05079	4.65496	5.51335
	FBgn0262599	CG43129	20.9752	56.2998	29.7477
	FBgn0024227	ial	0.192618	0	0.178486
	FBgn0027363	Stam	23.95	16.4438	16.3425
	FBgn0264351	CR43807	0	0	0
	FBgn0032311	CG12517	0	0	0
	FBgn0032312	CG14071	0	0	0
	FBgn0032313	CG14070	0	0	0
	FBgn0032314	CG7309	0	0	0
	FBgn0032315	CG14069	0	0	0
	FBgn0261871	dpr2	1.46546	1.69095	0.759213
	FBgn0032318	CG14072	0	0	0
	FBgn0053129	CG33129	21.1355	21.6572	17.4847
	FBgn0032321	YL-1	11.5142	8.34456	9.14688
	FBgn0032322	CG16743	75.919	42.4923	41.2063
	FBgn0000018	abo	1.95142	3.71507	2.71592
	FBgn0010612	l(2)06225	3133.74	3393.98	2692.13
	FBgn0041781	SCAR	16.4432	11.4021	10.7266
	FBgn0004872	piwi	0.270466	0.228997	2.82604
	FBgn0026148	CG12253	1.65877	0.623322	1.02487
	FBgn0026147	CG16833	6.73442	5.40715	6.29489
	FBgn0000146	aub	0.850599	0.130904	1.97836
	FBgn0040096	lectin-33A	13.9371	22.028	16.4727
	FBgn0015756	RpL9	717.843	733.71	898.341
	FBgn0021761	Nup154	4.29757	1.58074	5.02936
	FBgn0032329	Art8	4.13228	4.76408	4.17758
	FBgn0250837	dUTPase	3.85123	2.86785	7.37035
	FBgn0032330	Samuel	2.76084	2.943	3.75165
	FBgn0023415	Acp32CD	0.280248	0	0
	FBgn0032331	CG14913	0.400165	0	0.123738
	FBgn0040967	CG18666	0	0	0
	FBgn0032335	CG14915	0	0	0
	FBgn0263971	CG43725	0	0	0
	FBgn0032336	Ast-C	2.64481	2.87354	11.1938
	FBgn0032337	Ast-CC	0	0	0
	FBgn0032338	CG16854	1.59196	1.9254	1.40795
	FBgn0032339	CG4705	4.07744	3.288	3.42657
	FBgn0032340	Ge-1	8.19291	5.96877	6.67139
	FBgn0032341	Reps	5.30853	4.62194	5.36403
	FBgn0261983	l(2)gd1	18.5003	8.61808	7.66403
	FBgn0032343	CG6201	2.74554	0.929566	1.61429
	FBgn0041246	Gr32a	0.481953	0.271735	0
	FBgn0027582	CG6230	7.1359	4.64252	7.59619
	FBgn0032345	CG14921	0.258497	0	0
	FBgn0032346	Csl4	4.54022	2.79106	3.44131
	FBgn0028700	RfC38	1.22545	0.921518	1.64195
	FBgn0262647	Nup160	2.83039	1.16225	3.10821
	FBgn0032348	CG4751	3.49997	3.45831	3.60073
	FBgn0040211	hgo	8.42922	17.37	23.8758
	FBgn0010197	Gyc32E	0.297341	0.90642	0.276207
	FBgn0051867	CG31867	0	0	0
	FBgn0032350	CG6287	89.082	97.0598	142.461
	FBgn0259822	Ca-beta	20.9186	18.5124	16.9508
	FBgn0014076	Vm32E	0.716529	0	1.31518
	FBgn0032354	CG4788	1.44115	0.541703	1.48469
	FBgn0264441	CR43859	0.488595	0	0
	FBgn0264442	ab	2.70405	2.42277	2.20069
	FBgn0086035	snoRNA:Me18S-G642	0	0	0
	FBgn0040232	cmet	6.15339	4.53499	6.02862
	FBgn0052831	CG33695	13.9327	7.56118	10.6042
	FBgn0032358	Ppt2	59.0758	40.345	30.848
	FBgn0020270	mre11	14.3691	4.32338	5.13682
	FBgn0032359	Osi21	0.190194	0	0
	FBgn0263328	CR43409	0	0	0
	FBgn0263874	CR43721	0	0	0
	FBgn0032360	CG14926	0	0	0
	FBgn0000287	salr	12.5466	6.29902	5.29841
	FBgn0263764	CG43681	0	0	0
	FBgn0261648	salm	11.2068	11.6486	8.51051
	FBgn0263087	CG43355	0.387435	0	0
	FBgn0003313	sala	0	0	0
	FBgn0032361	CG6488	6.32824	5.44345	6.25878
	FBgn0032362	spz4	0	0	0.0662143
	FBgn0032363	CG6509	12.5999	11.8106	12.1135
	FBgn0032364	CG4970	0	0	0
	FBgn0032365	CG14929	0	0	0
	FBgn0032366	CG14930	0	0	0
	FBgn0262683	CG43153	0.69414	0.585746	0
	FBgn0028490	CG31705	194.673	105.127	170.882
	FBgn0051706	CG31706	14.3363	13.9963	14.0305
	FBgn0085191	CG34162	0	0	0
	FBgn0261707	CR42743	0	0	0
	FBgn0263386	CG43438	0	0	0
	FBgn0028412	Mst33A	0	0	0.165822
	FBgn0032367	CG6555	0	0	1.00771
	FBgn0015400	kek2	1.10415	1.03907	1.17803
	FBgn0032368	spag4	0	0	0
	FBgn0032369	CG6614	0	0	0
	FBgn0032370	CG12307	0	0	0.35086
	FBgn0032371	CG4983	0	0	0
	FBgn0262786	CG43167	0	0	0
	FBgn0032372	CG4988	0	0	0
	FBgn0032373	Vha100-5	1.06967	1.11447	16.1208
	FBgn0259960	CG42470	0	0	0
	FBgn0259961	CG42471	0	0	0
	FBgn0259962	Sfp33A1	0	0	0
	FBgn0032374	CG14931	0.541947	0	1.50438
	FBgn0032375	CG14932	0	0	0
	FBgn0032376	Tsp33B	0	0	0
	FBgn0032377	CG14937	0.961793	0.23247	0.509795
	FBgn0020309	crol	23.8308	20.3803	19.9761
	FBgn0086036	snoRNA:Me18S-A934	0	0	0
	FBgn0032378	CycY	12.8744	8.04452	12.7671
	FBgn0259225	Pde1c	9.33194	16.7371	12.906
	FBgn0000588	esc	6.12015	9.27737	4.37677
	FBgn0261056	Sfp33A4	0	0	0
	FBgn0259963	Sfp33A2	0	0	0
	FBgn0264565	CR43937	0	0	0
	FBgn0259964	Sfp33A3	1.53953	0	0
	FBgn0264564	CG43936	0	0	1.61699
	FBgn0051704	CG31704	39.8427	20.6536	24.3912
	FBgn0040968	CG14933	25.6115	11.057	20.4597
	FBgn0259989	CG42486	67.0982	45.4414	36.8229
	FBgn0032381	Mal-B1	11.1868	16.7162	11.1532
	FBgn0032382	Mal-B2	122.293	86.7122	103.547
	FBgn0261805	CG42751	9.09497	12.7286	4.86534
	FBgn0026392	Or33a	0	0	0
	FBgn0026391	Or33b	0	0	0
	FBgn0026390	Or33c	0	0	0
	FBgn0005664	Cry	0.344508	0.777392	2.9838
	FBgn0032385	CG16964	0	0	0
	FBgn0263019	CR43314	0.181045	0	0
	FBgn0263107	bft	0	0	0
	FBgn0032387	CG16965	12.3736	4.25229	9.24138
	FBgn0032388	CG6686	12.3709	7.96929	12.3638
	FBgn0085192	CG34163	9.35126	1.05761	6.30425
	FBgn0261266	zuc	0	0	0
	FBgn0032390	dgt2	3.19199	0.490068	1.87884
	FBgn0032391	escl	1.85024	1.41408	2.43678
	FBgn0051866	Ada1-2	4.68792	2.52142	3.55282
	FBgn0042127	CG18789	2.41174	1.9037	1.78889
	FBgn0051864	Qtzl	16.565	15.3024	20.673
	FBgn0051865	Ada1-1	3.59907	1.7894	1.76497
	FBgn0042125	CG18787	3.21302	3.80429	2.97905
	FBgn0032393	CG12264	42.7378	56.0481	57.4402
	FBgn0032394	CG6746	25.0046	27.1688	25.638
	FBgn0014019	Rh5	0.654919	0.276933	0.151799
	FBgn0032395	CG6734	1.90716	1.74787	2.29558
	FBgn0010497	dmGlut	2.17164	3.23532	7.09723
	FBgn0042126	CG18788	0	0	0.110696
	FBgn0032397	Tom70	5.31839	3.50638	5.22127
	FBgn0032398	CG6766	23.51	18.645	21.9225
	FBgn0032399	CG6785	1.02824	1.30613	1.00306
	FBgn0032400	CG6770	1349.56	1396.97	1228.52
	FBgn0032401	CG6792	3.19317	1.62139	2.46969
	FBgn0032402	CG14945	9.90009	10.0983	8.49589
	FBgn0028425	JhI-21	10.2527	6.5619	8.86179
	FBgn0032404	RpL7-like	34.017	29.5727	36.7381
	FBgn0085193	CG34164	0	0	0.261119
	FBgn0027505	rab3-GAP	4.29425	4.79569	3.55148
	FBgn0032405	CG14946	3.94753	4.6047	2.72244
	FBgn0032406	CG14947	0.302231	1.02069	0
	FBgn0003145	prd	0	0	0.0842387
	FBgn0032407	Pex19	27.2615	24.1611	28.7482
	FBgn0032408	CG6712	6.03506	3.68595	4.81781
	FBgn0028707	Mt2	2.06587	0.698433	1.33969
	FBgn0032409	Ced-12	7.15103	4.40263	5.13097
	FBgn0029137	Patsas	2.6449	2.16667	1.58434
	FBgn0027081	Aats-thr	22.0875	16.8995	20.9852
	FBgn0015797	Rab6	16.7745	10.1245	12.5177
	FBgn0263234	Phae1	0.21757	1.10328	1.61212
	FBgn0263235	Phae2	1.08689	0.458998	3.51987
	FBgn0032414	CG17211	0.0786624	0.0666243	0
	FBgn0032415	rho-6	0.799688	0	0.246668
	FBgn0032416	Gr33a	0	0	0
	FBgn0051760	CG31760	3.4409	3.70158	2.87375
	FBgn0051861	CG31861	0.685663	0	0
	FBgn0051860	CG31860	0.37493	0	0
	FBgn0032419	CG17217	1.27275	2.14602	1.95722
	FBgn0032420	CG6583	5.84205	6.94908	5.01024
	FBgn0032421	crok	4.2906	4.19836	3.34599
	FBgn0263088	CR43356	0	0.986565	0
	FBgn0000114	aret	45.746	29.4503	46.2408
	FBgn0032422	atilla	86.6962	95.0533	85.4849
	FBgn0051759	CG31759	0.387359	1.14742	1.24344
	FBgn0051862	CG31862	0.420617	0	0
	FBgn0264361	CG43813	0.514161	0	0
	FBgn0262475	bru-2	6.26042	5.9686	7.01512
	FBgn0032424	CG17010	0	0	0
	FBgn0041195	Pkd2	0.189666	0	0.0587243
	FBgn0043841	vir-1	493.066	351.842	271.551
	FBgn0032428	CG6405	1.68938	0.285724	0.939672
	FBgn0032429	CG5446	40.5936	35.1414	21.1655
	FBgn0032430	CG6388	7.61197	3.82429	4.41446
	FBgn0032431	CG5435	1.06193	0.448489	0.737019
	FBgn0040286	SC35	9.16189	8.64408	12.871
	FBgn0020443	Elf	21.3296	14.1164	19.5606
	FBgn0263468	snoRNA:SC35-a	0	0	0
	FBgn0263469	snoRNA:SC35-b	0	0	0
	FBgn0032433	Oatp33Ea	0.907437	0.838952	14.1336
	FBgn0032434	CG5421	0.149287	0	0
	FBgn0032435	Oatp33Eb	0.837756	0.128952	3.81912
	FBgn0032436	CG5418	0.192429	1.62682	0.534936
	FBgn0032437	CR17024	0	0	0.323768
	FBgn0259176	bun	145.711	79.1111	114.348
	FBgn0262203	mir-967	0	0	0
	FBgn0051858	t-cup	0	0	0
	FBgn0261812	CG42754	0	0	0
	FBgn0262353	CG43051	30.3641	23.9846	54.1712
	FBgn0263458	snoRNA:CG43051-a	8.79668e-05	0.000867313	1.75343
	FBgn0261709	CR42746	0.887581	0.499626	0.273631
	FBgn0085424	nub	0.527923	0.536519	2.62893
	FBgn0032439	Ref2	0	0	0
	FBgn0004394	pdm2	0.45354	0.495928	1.02844
	FBgn0032442	CG15485	0	0	0
	FBgn0032444	CG5525	26.6307	14.9606	26.8944
	FBgn0032445	CG6153	6.35751	5.36662	7.93456
	FBgn0032446	CG5780	0.827759	0.932127	0.255283
	FBgn0032447	PICK1	1.3195	2.23266	2.15015
	FBgn0032448	CG5781	0	0	0
	FBgn0032449	CG17036	2.7581	1.55562	2.07129
	FBgn0032450	CG5776	3.21153	1.69313	1.98957
	FBgn0032451	spict	34.815	15.62	13.3353
	FBgn0032452	CG15484	0.523887	0	0.242414
	FBgn0032453	CG6180	36.9085	42.6186	40.1214
	FBgn0032454	CG5787	6.9351	5.32026	5.83652
	FBgn0032455	CG5792	24.4146	19.781	20.4849
	FBgn0032456	MRP	25.7955	23.0792	28.395
	FBgn0032457	CG15483	0	0	0
	FBgn0264366	CR43818	0	0	0
	FBgn0015399	kek1	2.30559	1.65697	2.43488
	FBgn0040508	ACXC	0	0	0
	FBgn0040509	ACXB	0	0	0
	FBgn0040510	ACXA	0	0	0
	FBgn0040506	ACXE	0	0	0
	FBgn0032462	CG16800	0	0	0
	FBgn0263598	Vha68-2	84.6243	82.5713	93.9138
	FBgn0032464	Vha68-3	0	0	0
	FBgn0032465	CG12404	19.4786	15.835	17.5305
	FBgn0020368	Vha68-1	134.629	121.596	123.437
	FBgn0021796	Tor	6.11534	4.47188	5.80566
	FBgn0032467	CG9934	78.724	36.8242	37.9219
	FBgn0028965	A16	10.4962	8.8766	10.4915
	FBgn0262160	CG9932	25.2752	22.3433	22.7857
	FBgn0032470	CG5142	2.09251	2.83343	1.35951
	FBgn0262352	CG43050	0	0	0
	FBgn0032471	CG5122	0	0	0.0477649
	FBgn0032472	CG9928	323.919	348.202	253.699
	FBgn0040972	CG16978	75.2827	233.639	108.755
	FBgn0028410	Pk34A	0	0	0
	FBgn0032473	CG5204	0.0892728	0.151131	0.0828817
	FBgn0032474	DnaJ-H	32.6417	25.2301	25.5408
	FBgn0024291	Sir2	15.8421	12.1875	12.1234
	FBgn0032475	Sfmbt	7.72577	4.70922	6.39066
	FBgn0264546	CG43925	0	0	0
	FBgn0032476	CG5439	8.96326	9.18112	9.19264
	FBgn0032477	CG5287	11.4167	6.20003	7.84386
	FBgn0032478	CG5458	0.178774	0	0.165701
	FBgn0032479	CG16974	18.6426	19.0322	22.4707
	FBgn0051849	CG31849	1.25459	0.980182	0.627101
	FBgn0032480	Edem2	9.86993	7.89169	9.61125
	FBgn0032481	CG16972	2.81744	1.80436	2.65034
	FBgn0032482	Pect	91.6269	64.1874	70.217
	FBgn0032483	CG15482	0	0.377773	0
	FBgn0004191	snRNA:U2:34ABa	42.0384	21.2235	34.139
	FBgn0032484	kek4	1.51535	0.570114	1.01616
	FBgn0004192	snRNA:U2:34ABb	25.5606	18.6352	9.15924
	FBgn0032485	CG9426	6.87178	3.9521	6.38272
	FBgn0032486	CG5705	5.65401	5.57898	9.029
	FBgn0032487	Ski6	2.32954	3.0611	4.55153
	FBgn0032488	CG16812	8.40834	4.60341	8.03086
	FBgn0032489	CG15480	0.581039	0	0
	FBgn0032490	CG16813	0	0	0
	FBgn0032491	CG16815	0.214483	0	0
	FBgn0032492	Prosalpha6T	0	0	0
	FBgn0032493	CG15479	0.29104	0	0
	FBgn0027586	CG5867	96.3368	72.3682	122.056
	FBgn0032494	CG5945	95.9087	118.479	126.466
	FBgn0041720	snRNA:U2:34ABc	25.5606	18.6352	9.15924
	FBgn0003935	snRNA:U5:34A	0	0	0
	FBgn0032495	CG16820	12.2106	13.8511	11.8409
	FBgn0051728	CG31728	0.783146	0.132597	0.218168
	FBgn0051851	CG31851	0	0.476057	0
	FBgn0051730	CG31730	0.946594	0	0.436305
	FBgn0032497	CG6043	128.794	83.5794	81.3111
	FBgn0028406	Drep-4	4.33502	3.24228	3.55593
	FBgn0051848	CG31848	0	0	0
	FBgn0032498	CG6108	4.28738	2.03982	2.81977
	FBgn0032499	Uvrag	6.77553	6.23125	6.21346
	FBgn0051729	CG31729	53.7315	36.8356	34.7157
	FBgn0040973	CG16824	0	1.35007	0
	FBgn0264308	CG43778	3.06523	3.42232	4.80299
	FBgn0264301	CG43779	0	0	0.539985
	FBgn0032503	CG16825	1.16919	1.16461	0.958149
	FBgn0032505	CG16826	8884.5	8825.31	3849.18
	FBgn0032506	CG9395	2.48216	3.61712	2.68118
	FBgn0032507	CG9377	7.7397	31.2038	17.2841
	FBgn0022069	Nnp-1	4.25277	3.90566	5.28841
	FBgn0032509	CG6523	42.8892	53.1788	39.6637
	FBgn0051852	Tap42	9.21238	4.53269	7.14294
	FBgn0051855	CG31855	13.4527	13.6826	12.1055
	FBgn0032511	CG9306	450.946	528.687	465.175
	FBgn0032512	CG9305	8.49139	3.09136	5.1707
	FBgn0032513	CG6565	19.406	17.5419	22.9214
	FBgn0032514	CG9302	3.66458	2.00667	3.80118
	FBgn0025724	beta'Cop	17.0276	15.7899	17.1956
	FBgn0032515	loqs	8.73845	8.02791	9.32251
	FBgn0032516	CG9293	7.13541	9.24457	6.25485
	FBgn0032517	CG7099	1.35564	1.66497	1.88982
	FBgn0032518	RpL24	339.405	469.007	644.671
	FBgn0032519	CG16957	0	0	0.274453
	FBgn0032520	CG10859	0	0	0
	FBgn0032521	CG7110	4.21293	1.56059	3.36276
	FBgn0003983	Vm34Ca	1.25479	3.16593	40.9478
	FBgn0032522	CG16848	0	0	0
	FBgn0032523	CG16956	0	0	0.31625
	FBgn0264432	CG43850	5.29555	0.811172	1.77489
	FBgn0263354	CG42784	8.30184	12.1084	8.63075
	FBgn0026760	Tehao	0.568127	0.137412	1.95941
	FBgn0032524	CG9267	6.53799	3.11888	8.39232
	FBgn0032525	Hsp60D	0.113481	0	0
	FBgn0261991	CG42809	0	0	0
	FBgn0261992	CG42810	0	0	0
	FBgn0023407	B4	12.9574	9.36594	9.21838
	FBgn0053640	CG33640	0	1.76882	0
	FBgn0053641	CG33641	0	0	0.325256
	FBgn0053642	CG33642	0	0	0
	FBgn0053643	CG33643	0	0	0
	FBgn0053644	CG33644	0	0	0
	FBgn0053645	CG33645	0	0	0
	FBgn0028943	CG15638	0	0	0
	FBgn0028942	CG16852	0	0	0
	FBgn0028941	CG16853	0	0	0
	FBgn0032530	CG9263	0	0	0
	FBgn0259984	kuz	4.21182	3.32347	4.39738
	FBgn0262194	mir-2489	0	0	0
	FBgn0028513	CG9254	0	0	0
	FBgn0263329	CR43410	0	0	0
	FBgn0028546	ics	46.8701	32.1749	30.1405
	FBgn0028527	CG18507	11.4529	14.8882	13.9518
	FBgn0051814	CG31814	1.39283	0.81656	0.796291
	FBgn0028848	CG7311	0	0	0
	FBgn0028847	CG9014	0	0	0
	FBgn0051813	CG31813	0	0	0
	FBgn0262272	mir-1002	0	0	0
	FBgn0262332	mir-968	0	0	0
	FBgn0028541	TM9SF4	14.4002	11.2521	13.9241
	FBgn0263206	CG43376	0	0	0
	FBgn0028540	CG9008	15.5291	13.6893	14.1121
	FBgn0051845	CR31845	0.557317	0.470675	0
	FBgn0024846	p38b	18.6731	14.8946	17.7682
	FBgn0028932	CG16890	14.5462	8.52608	9.52489
	FBgn0028539	CG31731	14.879	8.72083	10.5161
	FBgn0028931	CG16863	0.779291	0.659539	0.452107
	FBgn0028538	sec71	11.889	9.80778	12.0535
	FBgn0027844	CAH1	10.3329	11.3103	8.87749
	FBgn0028658	adat	17.0894	20.151	14.9722
	FBgn0028919	CG16865	8.62303	3.53085	5.80254
	FBgn0032533	CG16888	0	0	0.457038
	FBgn0001965	Sos	5.27683	4.19584	5.40432
	FBgn0000153	b	367.624	261.152	282.959
	FBgn0004406	tam	2.73842	1.70367	2.49203
	FBgn0001961	Sop2	37.6258	23.488	26.47
	FBgn0015271	Orc5	1.56767	0.442103	0.848357
	FBgn0004407	DNApol-gamma35	9.89762	9.9576	11.1667
	FBgn0026373	RpII33	7.56557	5.77346	8.13349
	FBgn0260407	mRpS23	7.81284	8.7878	10.9953
	FBgn0028509	cenG1A	77.7546	41.9112	45.4566
	FBgn0053307	CG33307	48.1509	44.184	49.2187
	FBgn0053306	CG33306	0	0	46.7662
	FBgn0028920	CG8997	2.22611	1.41003	327.464
	FBgn0028534	CG7916	0.521108	0.88038	149.021
	FBgn0028533	CG7953	0.642047	1.0853	213.301
	FBgn0028532	CG7968	0	0.480869	28.1813
	FBgn0019890	Smg5	64.0878	48.9234	53.4801
	FBgn0012037	Ance	12.367	14.2554	49.9687
	FBgn0032535	Ance-2	0	0.397511	0
	FBgn0025115	Acyp	0	0	0
	FBgn0032536	Ance-3	6.24448	7.04926	4.3819
	FBgn0028938	CG16886	0	0	0.0846717
	FBgn0261628	CG42711	31.5415	8.85816	16.7395
	FBgn0032538	CG16885	4.20537	54.3401	20.5846
	FBgn0028544	CG16884	4.40108	57.6955	19.0926
	FBgn0261514	nimA	0.289919	0	0
	FBgn0027929	nimB1	13.9885	11.6846	6.7283
	FBgn0028543	nimB2	181.079	94.551	154.493
	FBgn0054003	nimB3	45.6293	20.916	10.7912
	FBgn0028542	nimB4	18.4198	8.86682	14.1655
	FBgn0028936	nimB5	20.3254	14.9135	17.8288
	FBgn0028430	He	3.08133	1.29949	0.711279
	FBgn0259896	nimC1	41.0788	23.5905	10.5044
	FBgn0028940	Cyp28a5	46.9798	14.2854	155.856
	FBgn0028939	nimC2	3.3045	4.59041	4.24828
	FBgn0003255	rk	0.341752	0.577037	0.557153
	FBgn0261582	CG42692	0	0	0
	FBgn0028909	tRNA:Q:34E	0	0	0
	FBgn0027348	bgm	59.3591	51.8138	61.5944
	FBgn0001967	nimC3	0	0	0
	FBgn0028519	CG4500	1.73883	9.15735	4.84239
	FBgn0028872	CG18095	0.419623	0.198503	1.30761
	FBgn0028875	nAcRalpha-34E	2.4068	2.90556	1.99671
	FBgn0260011	nimC4	11.2371	12.1743	3.58048
	FBgn0028904	CG16879	0	0	0
	FBgn0028526	CG15293	271.171	193.329	185.242
	FBgn0051769	CG31769	83.014	45.3365	63.6846
	FBgn0028906	CG17341	1.01654	0.430426	1.03888
	FBgn0263037	CG43332	0	0	0
	FBgn0263038	CG43333	0.142183	0	0.0440356
	FBgn0016930	smi35A	29.7864	11.814	8.90686
	FBgn0261563	wb	1.89064	1.90765	1.34845
	FBgn0052971	CG32971	0	0	0
	FBgn0263648	CR43639	0	0	0
	FBgn0263649	CR43640	0	0	0
	FBgn0261529	ms(2)34Fe	0	0	0.0390986
	FBgn0028916	CG33090	5.30423	4.13814	6.42198
	FBgn0028531	CG15286	0	0	0
	FBgn0264253	Send2	0	0	0
	FBgn0028530	mTTF	16.0452	13.0593	10.8086
	FBgn0261534	l(2)34Fc	76.5683	159.566	170.59
	FBgn0262354	CG43052	0	0	0
	FBgn0261535	l(2)34Fd	5.38451	2.93543	3.89741
	FBgn0015791	Rab14	72.2752	54.1595	58.0762
	FBgn0001970	Pgant35A	0	0	0
	FBgn0263440	CR43463	2.43492	2.91429	3.63548
	FBgn0015546	spel1	5.70159	3.88457	4.32183
	FBgn0020258	ppk	0.42771	0.289644	0.158847
	FBgn0004858	elB	5.4081	4.94766	5.36991
	FBgn0032546	pburs	0	0	0.684651
	FBgn0028871	Cpr35B	0	0	0
	FBgn0028844	CG15283	0	0	0
	FBgn0005771	noc	13.7173	11.4898	13.8233
	FBgn0028882	tRNA:P:35Bd	0	0	0
	FBgn0011862	tRNA:G3:35Ba	0	0	0
	FBgn0011863	tRNA:G3:35Bb	0	0	0
	FBgn0011864	tRNA:G3:35Bc	0	0	0
	FBgn0053648	CG33648	0	0	0
	FBgn0011865	tRNA:G3:35Bd	0	0	0
	FBgn0011866	tRNA:G3:35Be	0	0	0
	FBgn0250844	CG4218	0	0	0.19653
	FBgn0028913	CG3473	0	0	0
	FBgn0261566	CG42680	5.76951	0	0
	FBgn0028912	tRNA:P:35Ba	0	0	0
	FBgn0028911	tRNA:P:35Bb	0	0	0
	FBgn0028910	tRNA:P:35Bc	0	0	0
	FBgn0003016	osp	9.78588	10.0294	8.91434
	FBgn0263330	CR43411	0.975276	0	2.67246
	FBgn0000055	Adh	4125.78	3274.79	5863.38
	FBgn0000056	Adhr	0.483597	0.584095	0.54013
[truncated: 13,605 more rows]

## Sheet: Acute larval mtUPR (Fig4)
			Larval fat body
			FPKM DaGS X delta OTC		FPKM PGAM51, DaGS X PGAM51, delta OTC
	tracking_id	gene_short_name	-RU468	+RU468	-RU468	+RU468
	FBgn0031208	CG11023	7.8435	0.870053	5.0007	4.75757
	FBgn0002121	l(2)gl	10.7758	12.2606	8.34976	12.6014
	FBgn0031209	Ir21a	0	0	0	0.104304
	FBgn0263584	CR43609	1.25101	0.219481	1.42963	0.623451
	FBgn0051973	Cda5	1.43783	1.54545	2.77236	2.12143
	FBgn0067779	dbr	7.48343	4.80665	7.42345	5.09013
	FBgn0031213	galectin	40.7763	41.5882	45.1072	41.287
	FBgn0031214	CG11374	1.60778	0.187815	0.57364	0.856025
	FBgn0002931	net	4.00628	1.83061	3.9468	2.41757
	FBgn0031216	CG11376	4.47475	3.87634	3.32408	3.96753
	FBgn0031217	CG11377	20.2163	18.7819	18.6365	23.0511
	FBgn0026787	Nhe1	13.7873	7.49554	10.1134	7.11134
	FBgn0005278	Sam-S	181.832	182.159	116.93	209.795
	FBgn0031228	CG11455	203.481	268.718	229.172	181.563
	FBgn0031229	CG3436	16.6361	16.2358	18.7372	15.6653
	FBgn0031227	CG3709	3.37898	1.11085	0.679811	1.68525
	FBgn0031219	CG13694	3.40372	2.6221	2.54231	2.99327
	FBgn0031220	CG4822	81.7382	24.0514	87.8717	21.5745
	FBgn0025683	CG3164	119.684	80.6086	142.055	94.6316
	FBgn0001142	Gs1	658.575	327.938	1022.09	344.843
	FBgn0051975	CG31975	1.52887	2.23956	2.38249	1.32934
	FBgn0051974	CG31974	9.85955	20.1627	15.7585	11.2499
	FBgn0031224	CG11454	15.4534	12.7906	18.9663	10.803
	FBgn0259818	CG42399	0.751485	0.330145	0.642494	0.648282
	FBgn0053635	CG33635	6.01621	5.35012	6.94127	3.50834
	FBgn0016977	spen	3.36738	2.58217	2.43864	2.85856
	FBgn0031231	mRpL10	15.3523	18.0543	17.2532	15.6768
	FBgn0031233	CG11490	5.94443	4.62771	6.78458	4.97151
	FBgn0031232	CG11617	0.297627	0.417034	0.477187	0.475511
	FBgn0086902	kis	8.89491	6.13746	7.38614	6.82639
	FBgn0031235	CG13693	6.50299	0.68408	5.23204	3.63283
	FBgn0263465	snoRNA:kis-a	0	0	0	0
	FBgn0262252	mir-965	0	0	0	0
	FBgn0022246	Rpp30	6.07501	3.96803	3.23211	4.21308
	FBgn0031238	CG3645	5.12734	5.17862	4.84274	4.09124
	FBgn0031239	CG17075	0.249513	0.0485678	0.0895278	0.263825
	FBgn0031240	CG3345	19.4862	2.8661	15.7279	14.8495
	FBgn0086912	mbm	3.98147	3.15061	2.30108	5.21333
	FBgn0086856	CG11555	14.1934	15.4755	9.69542	12.7189
	FBgn0086855	CG17078	7.36882	3.6714	6.25048	3.91557
	FBgn0003444	smo	3.05787	2.67722	2.71177	2.8695
	FBgn0031244	CG11601	9.31415	4.12041	9.07198	5.22449
	FBgn0031245	CG3625	138.066	178.813	117.96	151.259
	FBgn0025686	CG11592	4.16764	5.24615	5.96009	2.89947
	FBgn0031247	CG11562	26.9464	14.8609	33.5695	22.2952
	FBgn0017457	U2af38	21.0873	12.5871	17.1511	11.1553
	FBgn0024352	Hop	62.7193	48.2783	53.8194	49.6762
	FBgn0020622	Pi3K21B	10.1522	6.76509	7.79796	7.5788
	FBgn0004611	Plc21C	2.51117	1.82885	1.86319	2.22555
	FBgn0264086	CG43755	22.5025	2.94317	21.3336	11.488
	FBgn0263872	CR43719	0	0	0	0
	FBgn0031248	CG11912	0	0.783625	430.724	0
	FBgn0031249	CG11911	0	0	51.3226	0
	FBgn0053127	CG33127	0	5.1335	1.05506	0
	FBgn0051921	CG31921	12.344	1.35218	8.67724	7.84994
	FBgn0031250	Ent1	45.8092	28.9367	53.8623	36.6152
	FBgn0000061	al	0.591764	1.31446	2.11783	0
	FBgn0263871	CR43718	0.596495	0	0	0
	FBgn0031251	CG4213	3.03661	0.555002	1.97528	2.48293
	FBgn0003278	RpI135	1.99966	1.57143	0.924205	2.04825
	FBgn0263350	alpha-Adaptin	20.0034	18.3084	18.4807	19.1235
	FBgn0263933	ebi	8.80537	5.4683	7.29824	6.00187
	FBgn0031252	CG13690	1.08195	1.40769	0.495443	0.988112
	FBgn0002593	RpLP1	3055.24	3576.44	4265.94	3418.07
	FBgn0031253	CG11885	30.1001	11.977	33.6601	18.7017
	FBgn0031254	CG13692	0.665179	0	0.349987	0.534262
	FBgn0031255	BBS8	0.313469	0.0732846	0	0
	FBgn0004583	ex	3.45193	2.07894	2.93084	1.50321
	FBgn0015924	crq	32.0388	27.8218	33.9697	22.2389
	FBgn0263870	CR43717	0.418753	0	0.437471	0.674322
	FBgn0031256	CG4164	45.4527	49.1101	36.9349	43.2591
	FBgn0262510	CR43080	24.4691	25.7802	19.8871	25.9243
	FBgn0031257	CG4133	0.269977	0.0947469	0.0726447	0.215189
	FBgn0031258	CG4297	3.37417	3.32914	2.04298	3.77224
	FBgn0027592	MED15	9.30075	4.80326	7.15267	6.14276
	FBgn0003963	ush	6.48185	6.33426	5.9297	6.3691
	FBgn0043364	cbt	20.07	22.2666	20.6994	38.6802
	FBgn0010602	lwr	62.6088	40.8211	46.8765	38.1756
	FBgn0031260	Spp	89.5385	142.729	65.7112	118.437
	FBgn0031261	nAcRbeta-21C	8.18857	7.40545	12.4651	5.68423
	FBgn0005660	Ets21C	0.428692	0.100316	0.230677	0.34176
	FBgn0260933	rempA	0.350881	0.116088	0.438353	0.473777
	FBgn0031263	CG2789	56.434	47.2372	64.173	42.1411
	FBgn0031264	CG11835	1.32679	0.581818	0.272192	0.609719
	FBgn0031265	CG2794	11.4374	10.5618	6.79999	11.5188
	FBgn0021874	Nle	2.62814	3.44536	3.40597	4.0131
	FBgn0031266	CG2807	7.89527	5.82806	5.56444	5.19818
	FBgn0031267	Ipk2	10.9906	7.48619	10.9294	5.61086
	FBgn0031268	cold	17.775	12.3237	17.2839	6.75529
	FBgn0013323	Ptth	2.49063	0.268221	1.02026	0.613043
	FBgn0023489	Pph13	0	0	0	0
	FBgn0010323	Gsc	0.0836191	0.117352	0	0
	FBgn0031270	CG13689	2.24416	4.69923	6.75413	3.08889
	FBgn0263657	CR43648	0	0	0	0
	FBgn0263658	CR43649	0.261827	0	0.277188	0
	FBgn0040106	lectin-21Cb	0	0	0	0
	FBgn0040107	lectin-21Ca	0	0	0	0
	FBgn0031273	CG2839	0.135916	0.0954034	0	0
	FBgn0000497	ds	1.57092	0.441612	0.948736	0.270896
	FBgn0011244	Hsp60B	24.6175	2.45152	19.2195	15.2902
	FBgn0026438	Eaat2	0.111349	0	0	0
	FBgn0031275	GABA-B-R3	0.480277	0.0564649	0.318132	0.318786
	FBgn0031276	CG12506	0	0.773796	0	0
	FBgn0040725	CG13946	0.919188	1.90065	3.70017	0
	FBgn0031277	CG13947	15.51	26.0109	7.74791	0
	FBgn0041250	Gr21a	0	0	0	0
	FBgn0031279	CG3544	1.75682	0.0684658	2.41045	1.71284
	FBgn0000442	Pkg21D	3.53421	2.62126	1.79484	1.27569
	FBgn0051658	Nnf1b	3.47194	0.559909	2.82614	1.28464
	FBgn0086130	KH1	4.23703	3.62408	4.65814	4.12305
	FBgn0031281	Saf6	2.79524	1.30793	1.23411	1.03237
	FBgn0031282	Pex12	10.2788	9.68171	9.75594	12.8553
	FBgn0031283	CG15880	2.69622	1.57163	2.38625	1.43926
	FBgn0031284	CG3876	5.26053	3.30886	3.46479	2.80092
	FBgn0015621	Clp	6.17604	4.9604	6.27913	5.29585
	FBgn0031285	CG3662	95.3953	66.4007	124.391	62.9377
	FBgn0031286	CG3862	3.55761	3.24269	3.43173	2.272
	FBgn0010583	dock	18.4431	9.56869	12.4888	9.75836
	FBgn0020304	drongo	36.3494	10.7761	54.4871	8.96624
	FBgn0031287	CG4291	7.8449	5.81933	8.7113	5.40837
	FBgn0020545	kraken	36.863	50.3848	29.8014	54.621
	FBgn0031288	CG13949	2.95259	0.937851	2.55604	3.87348
	FBgn0262177	mir-375	0	0	0	0
	FBgn0031289	CG13950	2.15939	1.25997	2.87775	1.72684
	FBgn0029095	aru	4.56261	2.21474	3.7537	1.61611
	FBgn0086031	snoRNA:Me28S-U1230	0	0	0	0
	FBgn0020305	dbe	12.4655	10.0754	9.89942	7.1528
	FBgn0053526	PNUTS	28.8655	23.4617	16.4102	20.6526
	FBgn0002936	ninaA	0.698584	0	0.49427	0.372997
	FBgn0031292	CG15824	2.91155	0.382349	1.9402	1.90658
	FBgn0002563	Lsp1beta	29917.1	0	24234.4	49866.3
	FBgn0003916	snRNA:U1:21D	6.05822	6.81552	21.2998	9.7055
	FBgn0046113	GluRIIC	0	0.199145	0.244513	0.452056
	FBgn0028481	CG4341	0.13268	0.0847782	0.047706	0
	FBgn0031294	IA-2	0.717489	0.557066	0.611964	0.157593
	FBgn0031295	CG4375	34.6747	4.40617	31.1447	19.7931
	FBgn0031296	CG4415	26.226	9.23996	19.2144	14.3545
	FBgn0003310	S	5.92971	1.69863	4.0999	2.44912
	FBgn0015905	ast	3.43557	1.71021	2.75834	3.18627
	FBgn0031298	Atg4	20.7161	17.3283	25.9083	21.984
	FBgn0031299	CG4629	1.96487	1.46836	3.77167	1.47869
	FBgn0261938	mtRNApol	2.89845	1.14846	1.5643	2.24925
	FBgn0031301	CG14339	1.34954	0.182235	1.17506	0.496284
	FBgn0031302	CG14340	0	0	0.201443	0
	FBgn0016926	Pino	62.5453	65.0086	41.5044	93.9759
	FBgn0031304	CG4552	16.779	12.3589	14.8528	14.0828
	FBgn0031305	Iris	0.505286	2.33913	0.43391	1.45139
	FBgn0031306	CG4577	0.408085	0.334195	0.585747	0
	FBgn0031307	MFS3	11.4452	5.96196	3.63437	3.4577
	FBgn0031308	CG4749	1.44021	2.64143	3.20812	1.23786
	FBgn0031309	Tfb4	10.5996	3.29729	7.87141	7.85214
	FBgn0031310	CG4764	35.1357	20.8829	34.272	22.9283
	FBgn0261458	capt	48.5091	32.7814	43.758	22.5818
	FBgn0264267	CR43767	0	0	0	0
	FBgn0031312	Tango14	12.4981	15.5059	12.4475	13.1569
	FBgn0031313	CG5080	44.6931	54.1319	41.8878	44.8294
	FBgn0031314	CG4785	2.57281	2.64299	2.36907	2.63865
	FBgn0031315	CG14341	21.8147	13.5271	16.742	20.0321
	FBgn0024314	Plap	28.6322	19.0265	30.0412	19.5919
	FBgn0051922	CG31922	2.55477	2.13106	2.64871	2.47473
	FBgn0031317	CG5118	6.52953	6.93956	7.9662	7.73537
	FBgn0031318	CG4887	7.35388	6.06753	5.59232	3.56411
	FBgn0031319	CG4896	6.39218	3.52285	6.71377	6.60476
	FBgn0031320	CG5126	12.1813	12.6252	9.94561	9.46311
	FBgn0031321	Tgt	2.35429	1.32057	1.76646	1.31555
	FBgn0031322	CG5001	8.50002	6.98569	7.99418	6.29095
	FBgn0031323	CG5139	18.1269	2.21077	13.6771	12.0017
	FBgn0263080	CG43348	0	0	1.34325	0
	FBgn0263081	CG43349	33.2017	29.8035	266.335	2.70033
	FBgn0040723	CG5011	0.617132	11.1286	10.7853	0
	FBgn0031324	CG14342	0	0	0	0
	FBgn0262944	CR43263	3.2094	0	3.14034	1.58242
	FBgn0259229	CG42329	1.19909	0.544585	2.50519	5.62302
	FBgn0031327	CG5397	7.05764	6.13129	4.51611	3.08227
	FBgn0041097	robo3	0	0.0846427	0.162664	0.0479695
	FBgn0011294	a5	0	0	0	0
	FBgn0031331	CG5440	16.8961	1.75496	9.05845	10.4025
	FBgn0053923	CG33923	0	0.273909	0	0
	FBgn0053922	CG33922	0.453127	0	0	0
	FBgn0026141	Cdlc2	30.4435	1.07201	23.2233	15.0635
	FBgn0031332	CG5556	5.04164	0.407187	4.54266	3.10258
	FBgn0031333	CG5561	14.2866	2.59363	12.2265	6.76958
	FBgn0051924	CG31924	3.62418	0.880582	4.11779	2.01881
	FBgn0031335	CG5565	19.4165	2.51039	13.9131	12.8382
	FBgn0051659	CG31659	0	0	0.374957	0
	FBgn0053126	NLaz	22.791	4.75251	93.1405	5.96509
	FBgn0031337	CG14346	18.4588	3.80624	14.5623	9.09857
	FBgn0002543	lea	3.56203	2.07305	1.95293	1.77785
	FBgn0263320	CG43401	1.11041	0	1.14713	0.897419
	FBgn0003926	snRNA:U3:22A	0	0	0	0
	FBgn0263321	CG43402	11.7913	6.2999	7.40697	8.22199
	FBgn0051928	CG31928	0	0	0.293377	0.218977
	FBgn0053128	CG33128	50.9808	33.8357	70.9167	0.432008
	FBgn0051926	CG31926	0.152502	0	0.162972	0
	FBgn0051661	CG31661	0	0	0	0
	FBgn0031343	CG18131	20.5924	3.23177	13.7771	11.9028
	FBgn0031344	CG7420	3.22576	3.43437	3.71318	3.05204
	FBgn0031345	CG18132	11.0875	1.3268	8.34506	2.03458
	FBgn0001174	halo	0	0	0	0
	FBgn0026398	Or22a	0.432363	0.100991	0.154128	0.230268
	FBgn0026397	Or22b	0	0	0	0
	FBgn0261509	haf	1.42596	0.698583	1.00259	0.547389
	FBgn0031347	CG10869	34.9427	3.73664	25.0972	26.2235
	FBgn0051935	CG31935	6.75465	4.22876	6.61165	4.75464
	FBgn0031351	CG14352	2.8738	2.01166	3.06079	2.75869
	FBgn0021906	RFeSP	117.352	210.894	100.513	160.206
	FBgn0086758	chinmo	5.37761	1.54984	4.03875	6.21894
	FBgn0011570	cpb	42.3565	32.8147	46.592	25.6439
	FBgn0031356	CG17660	17.0795	12.5555	15.6049	14.0865
	FBgn0031357	mRpL48	9.16861	9.04867	7.66269	14.2136
	FBgn0086698	frtz	1.89608	2.26855	2.12066	1.86485
	FBgn0031359	CG18317	18.6487	19.5451	22.0162	21.4056
	FBgn0000579	Eno	314.453	692.782	280.411	550.698
	FBgn0260648	Rrp40	7.27164	6.44021	9.51031	10.0974
	FBgn0031360	CG31937	39.9403	71.3827	45.4456	57.1094
	FBgn0031361	CG17652	9.28741	7.30083	8.62511	11.901
	FBgn0264494	CG17646	2.66955	5.48489	2.14408	2.28552
	FBgn0027597	CG17712	9.88603	4.76997	9.62439	5.53614
	FBgn0031364	CG17648	3.00816	0	1.04041	0.809208
	FBgn0041249	Gr22f	0.335729	0	0.358304	0.536771
	FBgn0031365	CG17650	28.1694	6.97459	19.3582	10.7815
	FBgn0045497	Gr22e	0	0	0	0
	FBgn0045498	Gr22d	0	0	0	0
	FBgn0045499	Gr22c	0	0	0.352831	0.264207
	FBgn0045500	Gr22b	0	0	0	0
	FBgn0045501	Gr22a	0	0	0	0
	FBgn0051933	CG31933	8.5398	1.36454	5.54434	4.45051
	FBgn0051664	CG31664	2.20984	6.53773	2.06359	9.04477
	FBgn0031367	c-cup	24.1123	4.02388	20.532	15.2259
	FBgn0262275	mir-2280	0	10.3095	51.3179	0
	FBgn0051665	wry	0.089164	0.0417577	0.0320936	0.0473207
	FBgn0051663	CG31663	2.81071	3.44582	1.4385	1.13859
	FBgn0031372	CG7295	16.2447	1.23642	14.6878	6.21234
	FBgn0031373	CG15358	0	0	0	0
	FBgn0031374	CG7337	6.77502	3.45883	5.39833	5.21452
	FBgn0011859	tRNA:G3:22BCa	0	0	0	0
	FBgn0040719	CG15357	7.95592	1.84572	9.89837	5.1492
	FBgn0053673	CG33673	3.90822	0.546309	3.0345	1.6707
	FBgn0031375	erm	0.158967	0	0	0
	FBgn0051942	tRNA:CR31942	0	0	0	0
	FBgn0031376	Der-1	55.5418	51.8526	61.5157	55.4839
	FBgn0031377	CG15356	2.68459	1.3466	2.11958	1.68046
	FBgn0031378	CG15362	12.4624	5.68912	11.0465	6.52227
	FBgn0031379	CG7289	17.7016	11.2658	16.1996	13.9195
	FBgn0001125	Got2	199.397	340.311	205.599	225.875
	FBgn0031381	Npc2a	243.047	184.805	412.436	227.217
	FBgn0262148	CR42874	10.2625	5.39268	10.646	10.6118
	FBgn0043539	Obp22a	0	0.523032	0	0
	FBgn0053543	CG33543	0.371023	0.0868227	0.266417	0
	FBgn0263441	CR43464	0.777597	0.347318	0.456489	0.225419
	FBgn0040718	CG15353	3069.34	3732.05	2050.23	1422.59
	FBgn0040717	Nplp4	607.591	1332.56	229.087	496.861
	FBgn0051943	tRNA:CR31943	0	0	0	0
	FBgn0051944	tRNA:CR31944	0	0	0	0
	FBgn0031384	CG4238	7.5686	2.8591	7.1576	3.3269
	FBgn0051939	tRNA:CR31939	0	0	0	0
	FBgn0051940	tRNA:CR31940	0	0	0	0
	FBgn0051669	tRNA:CR31669	0	0	0	0
	FBgn0011860	tRNA:G3:22BCb	0	0	0	0
	FBgn0259192	CG42296	0	0.0400989	0	0.0910255
	FBgn0259230	lectin-22C	0	0.36778	0	3.37462
	FBgn0003557	Su(dx)	10.7814	7.47044	10.9244	7.53704
	FBgn0028952	Kebab	3.65291	0.458654	1.84481	2.73645
	FBgn0026396	Or22c	0	0	0	0
	FBgn0053516	dpr3	1.36437	0.478966	0.980127	0.815439
	FBgn0031388	CG12674	19.1577	5.16101	14.1599	11.5175
	FBgn0031389	CG4259	4.47335	11.4761	6.11439	8.52539
	FBgn0004507	GlyP	56.8355	89.7385	47.4008	90.7766
	FBgn0031390	tho2	8.5098	6.32394	6.23816	6.654
	FBgn0031391	CG11723	11.047	5.62825	9.95367	6.32028
	FBgn0027509	CG7261	7.73021	3.52892	5.93055	4.65246
	FBgn0031392	AIF	14.2972	9.04182	10.0832	13.4485
	FBgn0031393	CG15382	0.944363	0.661092	0.804834	0.60431
	FBgn0000097	aop	3.66779	2.4143	6.49052	2.37754
	FBgn0264082	CG43751	0	0	0	0
	FBgn0051946	tRNA:CR31946	0	0	0	0
	FBgn0031395	CG10874	27.1375	13.6857	26.9883	18.0603
	FBgn0085201	CG34172	2.79562	0	1.37385	0
	FBgn0051668	CG31668	0.0899232	0	0	0
	FBgn0053124	CG33124	0.335022	0.235079	0	0
	FBgn0031397	CG15385	15.7699	16.3606	13.1593	19.0529
	FBgn0010288	Uch	88.3608	34.6406	95.9364	49.9962
	FBgn0085203	CG34174	4.47696	3.54328	4.09484	2.87386
	FBgn0031398	CG10880	6.10256	2.74898	4.81653	4.17885
	FBgn0259717	CG42371	35.0244	25.1104	26.2692	25.331
	FBgn0031399	mio	8.71424	5.34835	7.52395	8.922
	FBgn0031401	papi	9.20777	4.82146	6.95584	5.12569
	FBgn0031403	CG15387	11.3146	8.33748	13.5989	9.08301
	FBgn0010704	l(2)s5379	60.6935	51.0916	55.0219	51.3851
	FBgn0262126	gho	25.6463	35.3934	17.9279	31.3475
	FBgn0051679	Tengl3	9.28886	0.481853	7.15717	6.87639
	FBgn0052463	Tengl2	3.06907	0.268541	0.817173	0.306891
	FBgn0051682	Tengl1	13.6775	1.81864	10.3427	5.81386
	FBgn0031405	CG4267	61.5718	28.4705	98.1991	49.1829
	FBgn0051686	CG31686	0.902125	0.83994	0.63459	0.482609
	FBgn0262106	CR42859	4.74804	0.484405	4.01512	4.20872
	FBgn0011832	Ser12	0	0	0	0
	FBgn0042186	CG17239	0	0	0	0
	FBgn0042187	CG17234	0	0	0	0
	FBgn0031406	Send1	0	0	0	0
	FBgn0031407	CG4270	11.6649	2.09309	14.7292	4.81853
	FBgn0054049	CG34049	1.22586	0	0.434733	0.326997
	FBgn0250841	CG17242	0	0	0	0
	FBgn0264084	CR43753	1.03797	0.108284	0.940784	0.934081
	FBgn0264085	CR43754	0	0.188198	0	0
	FBgn0031409	CG4271	0	0	0	0
	FBgn0051681	CG31681	0	0	0	0.669475
	FBgn0261523	CG42658	3.85486	0.192383	2.32931	3.97427
	FBgn0031410	CG17237	23.1544	4.08908	24.5715	17.9829
	FBgn0028570	robl22E	14.2869	1.14497	19.8087	5.74768
	FBgn0051949	CG31949	19.333	2.41348	16.8462	11.0334
	FBgn0031412	CG16995	1.19163	0	5.34507	1.43423
	FBgn0031414	eys	0.0425458	0.0135484	0.137962	0
	FBgn0031413	CG9967	0.775407	1.53276	2.02006	0.530376
	FBgn0014010	Rab5	99.4048	75.4903	118.462	77.1049
	FBgn0261647	Axud1	4.15901	3.11713	3.39465	3.2359
	FBgn0031417	CG3597	15.7006	14.778	25.1716	27.8062
	FBgn0031418	CG3609	54.7156	83.4622	52.9628	82.7456
	FBgn0031419	CG15390	1.93259	1.20188	1.3695	1.7189
	FBgn0031420	CG9866	4.07152	3.30396	4.53332	3.82017
	FBgn0264672	Eogt	7.12049	4.9971	6.58891	4.92775
	FBgn0031422	CG9870	2.56643	1.54223	1.44038	2.53681
	FBgn0031423	CG3557	9.07807	0.988277	6.66121	4.85278
	FBgn0264081	CG43750	8.86021	2.06487	6.52266	6.31006
	FBgn0031424	VGlut	0	0	0.129974	0.0958149
	FBgn0031426	CG18641	1.31791	0.355534	0.761727	0.647111
	FBgn0051948	CG31948	54.9174	7.79767	53.4152	29.4305
	FBgn0085477	CG34448	0	0	0	0.300727
	FBgn0085476	CG34447	0	0	0	0
	FBgn0031428	CG9886	8.82079	9.43393	9.66525	13.4324
	FBgn0000490	dpp	1.11231	0.468635	0.898485	0.504142
	FBgn0012017	tRNA:Y1:22Fb	0	0	0	0
	FBgn0012016	tRNA:Y1:22Fa	0	0	0	0
	FBgn0031429	CG15393	0	0	0.882822	0
	FBgn0015816	Slh	20.5601	25.9707	21.2614	21.4389
	FBgn0011818	oaf	17.7494	6.58207	13.0697	11.6917
	FBgn0031430	CG3528	2.97523	0.800356	2.67273	4.03206
	FBgn0031431	CG3515	5.58186	0.74942	4.07321	3.41308
	FBgn0031432	Cyp309a1	117.993	71.2803	84.6385	62.545
	FBgn0041337	Cyp309a2	2.58022	0.268151	1.23155	1.8297
	FBgn0085343	CG34314	1.19383	1.33924	1.27946	0.953047
	FBgn0031434	insv	3.77551	0.907811	4.51323	1.54956
	FBgn0031435	CG9883	1.32708	0.507505	1.03426	0.577887
	FBgn0031436	CG3214	103.011	145.703	97.9824	111.536
	FBgn0031437	p16-ARC	54.5249	38.8685	72.5746	28.4094
	FBgn0026479	Drp1	28.5681	16.8498	22.1284	21.1335
	FBgn0250835	CG15394	5.67535	1.237	4.47079	5.70154
	FBgn0031440	CG15395	13.1234	1.37213	8.738	5.41324
	FBgn0263322	CG43403	0	0	0	0
	FBgn0264434	CR43852	2.11859	0	2.0403	0
	FBgn0031441	CG9962	8.33201	1.51726	4.44661	2.13135
	FBgn0264433	CG43851	11.5	0.380367	6.2268	8.8498
	FBgn0053125	CG33125	2.42252	0.358005	2.38316	2.5039
	FBgn0031442	Prosbeta4R1	10.8962	1.90445	14.4368	6.34941
	FBgn0026395	Or23a	0.407059	0	0	0
	FBgn0031443	Prosbeta4R2	20.3632	2.53337	18.0019	12.5252
	FBgn0031444	CG9879	8.13994	1.3962	8.51128	2.92144
	FBgn0041248	Gr23a	0.170005	0	0.183712	0
	FBgn0051690	CG31690	0.104387	0	0.049034	0.166342
	FBgn0031446	CG15398	0.627355	0.438975	0.889556	1.67369
	FBgn0031449	CG31689	7.13997	15.1822	5.5887	11.1509
	FBgn0263564	mir-4914	0	0	0	0
	FBgn0031450	Hrs	22.1903	9.77967	26.0377	11.101
	FBgn0031451	CG9961	10.3168	0.892849	7.11083	5.2885
	FBgn0031452	Cwc25	4.56474	3.27434	2.89473	4.30471
	FBgn0250906	Pgk	114.507	206.872	129	155.693
	FBgn0031453	CG9894	197.495	184.021	230.617	188.149
	FBgn0031455	snapin	9.16216	8.76394	11.6633	10.2243
	FBgn0031456	Trn-SR	3.26892	3.0486	3.63435	3.33705
	FBgn0031457	CG3077	4.85167	3.49265	4.7732	4.18857
	FBgn0031458	aph-1	24.5753	12.5587	23.3162	15.5203
	FBgn0026324	Taf10b	29.6354	15.3382	36.5638	16.2822
	FBgn0019830	colt	39.5824	58.9753	40.77	73.5101
	FBgn0028398	Taf10	48.8812	31.9567	58.227	30.7577
	FBgn0031459	CG2862	203.226	202.646	140.891	197.686
	FBgn0031460	CG15399	10.9984	2.44645	6.6224	4.40644
	FBgn0004242	Syt1	77.4362	60.5863	79.3503	61.4965
	FBgn0264369	CR43821	0	0	1.62397	0.844012
	FBgn0031461	daw	62.5767	49.3861	51.9878	42.8145
	FBgn0031462	CG2964	7.14658	0.771346	6.29957	3.36192
	FBgn0031463	CG15400	13.4632	2.55197	7.27472	8.10145
	FBgn0031464	Duox	2.14749	1.1588	1.51254	0.247834
	FBgn0031465	CG3123	2.43066	0.505278	1.16072	1.72337
	FBgn0031466	CG3119	0.347809	0.234503	0	0
	FBgn0031467	Cpr23B	0.181997	0	0	0
	FBgn0031468	CG2975	1.69384	0.396087	1.61716	0
	FBgn0031469	CG18558	1.96407	0.413313	1.26528	1.25359
	FBgn0031470	CG18557	22.7216	9.57037	18.5052	18.6159
	FBgn0031471	CG3117	66.7803	27.8688	50.9414	33.3271
	FBgn0031472	CG2983	0	0.0998257	0	0
	FBgn0031473	CG3104	0	0.0899274	0	0
	FBgn0015521	RpS21	1082.44	1225.17	1970.77	1345.07
	FBgn0031474	CG2991	6.47693	7.71944	4.96494	5.58042
	FBgn0051694	CG31694	51.2634	35.9787	46.3261	41.168
	FBgn0031476	CG8813	21.4217	3.02621	22.3874	11.95
	FBgn0031478	CG8814	28.8525	44.1967	30.871	56.1302
	FBgn0031479	Prx6005	16.7774	11.7324	9.27633	12.4919
	FBgn0051950	CG31950	11.4755	7.08346	6.74531	8.3906
	FBgn0028970	betaggt-II	12.8082	13.1084	13.7165	9.4092
	FBgn0024947	NTPase	39.9984	52.8395	34.1746	29.7103
	FBgn0041111	lilli	9.98129	5.90116	8.18542	7.05319
	FBgn0010263	Rbp9	2.91461	1.37281	1.73107	2.50029
	FBgn0024920	Ts	3.3561	2.93997	2.39364	1.34038
	FBgn0004584	Rrp1	7.69226	7.74973	5.54528	6.20631
	FBgn0260639	gammaTub23C	7.95554	3.96704	5.86725	4.28212
	FBgn0031483	CG9641	36.3285	8.99883	20.8894	19.8286
	FBgn0031484	CG3165	12.7526	5.95781	9.85176	10.187
	FBgn0031485	CG9643	11.3282	9.45915	9.64082	11.0781
	FBgn0250786	Chd1	6.47882	5.56994	6.06972	6.38199
	FBgn0025109	Bem46	8.91072	5.51431	7.76199	6.69228
	FBgn0002989	okr	2.55339	1.54251	1.91917	2.55547
	FBgn0025681	CG3558	11.9958	10.3644	10.0199	11.4822
	FBgn0031488	CG17265	1.55969	0.511087	0.560457	0.497092
	FBgn0031489	CG17224	41.1994	20.4182	64.6324	18.1389
	FBgn0031490	CG17264	1.09087	0.76576	0.967392	0.613708
	FBgn0031491	alpha4GT1	19.2387	10.8532	23.45	12.682
	FBgn0031492	CG3542	6.72204	5.13337	5.14604	4.16741
	FBgn0031493	CG3605	12.3551	8.87222	11.8361	12.184
	FBgn0031494	CG17219	3.8836	3.66298	2.23535	3.58034
	FBgn0031495	GABPI	11.4434	9.89418	12.8834	7.40601
	FBgn0031496	CG17258	3.5231	0.293458	3.3451	2.09391
	FBgn0031497	CG17259	37.4228	43.5397	27.2644	47.5861
	FBgn0031498	CG17260	10.407	4.11474	6.71248	7.24575
	FBgn0243513	cnir	1.63003	1.13997	0.741405	1.49199
	FBgn0031500	CG17221	9.29992	17.4521	4.97478	12.9367
	FBgn0031501	CG17261	66.8473	13.4659	54.2391	39.7859
	FBgn0042627	v(2)k05816	0.216003	1.48741	0.116736	1.03175
	FBgn0263847	CR43708	0	7.92065	0	0
	FBgn0003934	snRNA:U5:23D	0	0	0	0
	FBgn0027571	CG3523	82.0993	389.379	46.4385	348.675
	FBgn0015600	toc	13.4081	3.11026	11.0439	9.15585
	FBgn0005779	PpD6	2.37932	0.392338	2.24597	1.34156
	FBgn0031504	CG15403	8.73592	1.52601	10.972	5.25346
	FBgn0031505	CG12400	103.223	155.748	100.181	137.024
	FBgn0011648	Mad	11.1197	9.59645	11.6937	12.715
	FBgn0260817	gkt	6.9895	3.55473	4.8849	3.31892
	FBgn0051953	CR31953	4.21785	1.36746	2.80792	2.65939
	FBgn0014906	Hydr2	45.5335	50.8459	48.536	55.2577
	FBgn0011985	tRNA:S7:23Eb	0	0	0	0
	FBgn0085435	CG34406	1.1809	0.607723	0.762044	0.376653
	FBgn0011984	tRNA:S7:23Ea	0	0	0	0
	FBgn0051698	CG31698	227.034	86.811	258.982	49.3877
	FBgn0031512	CG15404	195.322	58.0936	247.422	50.5796
	FBgn0085422	CG34393	0.0594694	0	0	0
	FBgn0031513	CG3347	3.74439	0.614974	2.14191	3.55754
	FBgn0031514	CG3332	1.69165	1.82672	2.94219	0.518545
	FBgn0031515	CG9664	39.1594	14.2375	41.9289	27.2392
	FBgn0031516	CG9663	10.2867	5.97326	10.9659	6.46905
	FBgn0031518	CG3277	0.340264	0.34135	1.15317	0.0774538
	FBgn0031519	CG3326	2.44961	0.532591	1.08469	0.661829
	FBgn0031517	CG15406	64.1208	51.4891	27.8168	17.1161
	FBgn0031520	CG8837	4.28936	9.91551	2.51222	1.08885
	FBgn0053281	CG33281	5.32114	42.1557	3.52062	16.2657
	FBgn0053282	CG33282	6.51787	15.7156	1.71645	2.55562
	FBgn0031522	CG3285	14.5028	47.5906	4.86826	10.7796
	FBgn0031523	CG15408	11.0047	12.5898	5.71255	3.50401
	FBgn0020445	E23	14.5403	3.00947	20.5294	2.13482
	FBgn0031526	CG8838	27.7777	3.26357	23.9474	14.6023
	FBgn0085423	CG34394	5.61142	4.02122	4.53424	4.46596
	FBgn0031528	CG15412	0.190955	0.066957	0.102506	0
	FBgn0031529	CG9662	27.4868	25.3655	19.9463	17.2093
	FBgn0016698	Ptpa	7.67452	7.79063	7.64916	8.03096
	FBgn0259949	Sfp23F	1.14265	0	0	0
	FBgn0259950	CG42460	217.048	98.3956	227.518	77.4205
	FBgn0085204	CG34175	6.69354	0.467062	4.22545	3.22588
	FBgn0031530	pgant2	2.12896	1.53052	1.63947	0.736226
	FBgn0031531	CG8840	32.3089	5.76612	21.8613	20.9232
	FBgn0051952	CG31952	6.60519	1.01563	6.19328	4.37792
	FBgn0031533	CG2772	2.77974	0.292214	0.89222	0.222033
	FBgn0031534	Snx1	61.0001	24.5702	86.012	27.1674
	FBgn0031535	CG12795	38.4887	11.734	30.8543	17.9007
	FBgn0031536	Cog3	7.93253	7.02227	7.92792	6.32145
	FBgn0031537	sec5	7.94488	6.12297	7.65797	5.80802
	FBgn0031538	CG3246	60.7908	102.247	72.404	123.656
	FBgn0005616	msl-2	3.62501	2.64043	2.93289	2.09701
	FBgn0263526	mir-4971	0	0.358796	0	0
	FBgn0021967	Pdsw	112.811	185.674	138.504	153.288
	FBgn0031540	CG3238	1.2222	0.714919	0.657864	0.541258
	FBgn0051776	CG31776	2.60484	0.6932	2.79883	2.43594
	FBgn0051956	pgant4	1.65216	1.96628	1.54837	4.23778
	FBgn0264549	CR43928	1.16559	0.203525	0.307714	0.467541
	FBgn0261560	Thor	659.799	706.2	1305.98	1079.71
	FBgn0031542	CG15414	1.44476	1.38093	1.54678	0.839094
	FBgn0014396	tim	0.928139	1.06631	0.499933	0.467121
	FBgn0051954	CG31954	0.20148	0	0.428814	0
	FBgn0053123	CG33123	7.06545	10.2362	4.74556	11.8231
	FBgn0031544	CG17593	39.0769	43.1341	42.9612	34.7848
	FBgn0031545	CG3213	49.7532	4.9617	42.0351	29.7493
	FBgn0031546	CG8851	13.0059	1.44966	10.9457	8.41805
	FBgn0031547	Sr-CIV	3.05091	1.58059	0.993995	1.27121
	FBgn0031548	CG8852	0.361276	0.253566	0.233264	0.115209
	FBgn0031549	Spindly	2.71255	1.19002	1.9711	1.29737
	FBgn0031550	Che-13	0	0	0.527364	0.589485
	FBgn0024244	drm	3.02994	1.86466	4.21325	2.37798
	FBgn0264370	CR43822	0	0	0	0
	FBgn0264363	CG43815	2.08328	0	0.7097	1.12635
	FBgn0004892	sob	0.593225	0.46269	0.709699	0.210158
	FBgn0264371	CR43823	0.315737	0	0.225865	0
	FBgn0002985	odd	0.889975	0.416409	0.877759	0.47304
	FBgn0015663	Dot	2.68597	3.0491	3.31353	3.6536
	FBgn0031554	CG15418	21.8536	3.55884	19.3557	14.2447
	FBgn0000721	for	59.8641	44.7507	74.4719	41.345
	FBgn0263523	mir-4972	0	0	0	0
	FBgn0085369	CG34340	0.19766	0.185	0.212823	0.210071
	FBgn0259951	Sfp24Ba	0	0	0	0
	FBgn0259953	CG42463	0	0	0	0
	FBgn0259952	Sfp24Bb	0	0	0	0
	FBgn0261054	Sfp24Bc	0	0	0	0
	FBgn0031558	CG16704	4279.16	3338.31	4766.59	3997.85
	FBgn0031559	CG3513	46.1243	54.1859	35.5941	88.8544
	FBgn0051779	Acp24A4	4.92231	2.56073	1.11312	3.27478
	FBgn0263096	CR43364	43.5173	43.2004	16.5761	56.517
	FBgn0262721	CG43165	36.863	30.2599	23.7414	34.3153
	FBgn0031560	CG16713	2012.43	2692.61	2644.73	3106.93
	FBgn0031561	CG16712	1528.71	6976.81	1045.28	4354.46
	FBgn0031562	CG3604	22.5466	3.49435	11.6497	4.60245
	FBgn0031563	CG10031	55.4984	28.1449	47.7903	57.153
	FBgn0259954	CG42464	1.34392	0	0	0
	FBgn0259955	CG42465	0	0	0	0
	FBgn0259956	Sfp24C1	0	0	0	0
	FBgn0259957	CG42467	0	0	0	0
	FBgn0262621	CG43145	0	0	0	0
	FBgn0031564	CG2816	8.48928	5.59822	8.38237	1.44013
	FBgn0051778	CG31778	343.937	181.761	439.82	278.71
	FBgn0051777	CG31777	89.746	73.0787	52.0111	28.6591
	FBgn0015376	cutlet	1.83455	1.14095	0.678032	1.08587
	FBgn0051955	CG31955	20.7879	14.6854	28.4199	16.4986
	FBgn0031566	CG2818	14.6586	12.4468	13.9487	11.7763
	FBgn0040104	lectin-24A	3.24001	8.92807	0.430947	1.29633
	FBgn0003386	Shaw	0.427208	0.126296	0.690492	0.340404
	FBgn0031568	CG10019	0.0857166	0.0250705	0.115593	0.1137
	FBgn0263846	CG43707	0.226531	0.106411	0.0812147	0
	FBgn0263842	CG43703	0	0	0	0
	FBgn0262392	mir-1004	0	0	0	0
	FBgn0263843	CR43704	0.463624	0.645207	0.482544	0
	FBgn0004893	bowl	8.19015	6.97558	6.50792	4.23467
	FBgn0051960	CG31960	14.632	1.24814	23.2817	9.39974
	FBgn0051958	CG31958	10.4763	0.957383	10.8261	5.34694
	FBgn0031571	CG3921	2.79558	1.81432	2.20542	1.18114
	FBgn0021800	l(2)k16918	2.25185	0.758564	2.50421	1.19335
	FBgn0031573	CG3407	2.43577	1.40791	2.15873	1.48495
	FBgn0003430	slp1	0.125568	0	0	0
	FBgn0004567	slp2	0	0.0515974	0.079104	0
	FBgn0031574	CG3964	17.1822	2.60038	13.1196	9.52864
	FBgn0031575	Cep97	17.1485	3.27685	12.1353	10.1899
	FBgn0051957	CG31957	15.2823	6.80801	18.8308	11.4886
	FBgn0000256	capu	12.1511	5.29141	8.90825	8.20835
	FBgn0051774	fred	0.0483451	0	0	0
	FBgn0051773	CG31773	8.72958	0.826709	6.48802	4.30792
	FBgn0264341	CG43797	0	0.554389	1.1195	0
	FBgn0085205	CG34176	16.184	14.2505	35.9781	4.77715
	FBgn0031579	CG15422	14.9481	13.7644	25.132	0.510685
	FBgn0031580	CG15423	10.8876	20.708	26.2483	0.674322
	FBgn0264295	CG43773	1.39914	1.91088	1.37448	0
	FBgn0264296	CG43774	3.77532	2.61777	27.1424	0
	FBgn0000547	ed	5.75691	2.57375	4.0514	1.06497
	FBgn0086032	snoRNA:Me28S-C437	0	0	0	0
	FBgn0020376	Sr-CIII	0.20536	0.718537	0.655388	0.328686
	FBgn0014033	Sr-CI	2.33727	3.52279	2.41901	1.51891
	FBgn0031585	CG2955	43.0026	4.38349	27.8366	23.3081
	FBgn0026394	Or24a	0	0	0	0.252417
	FBgn0051961	CG31961	6.50759	6.33679	9.82285	4.95879
	FBgn0040102	lectin-24Db	3.59493	1.60238	5.4083	1.0449
	FBgn0031589	CG3714	72.881	39.668	74.3	22.9894
	FBgn0001075	ft	1.03654	0.377754	0.581539	0.122206
	FBgn0031590	CG3702	29.725	21.479	28.2821	22.1808
	FBgn0003941	RpL40	1174.88	1389.36	1527.02	1273.51
	FBgn0031591	CG15425	24.3499	2.56189	26.61	18.4686
	FBgn0031592	Art2	4.72767	1.79139	2.87363	3.26489
	FBgn0010473	tutl	1.30621	0.405087	0.745201	0
	FBgn0028482	CG16857	2.90401	1.55113	0.815875	0.301902
	FBgn0020762	Atet	3.90312	1.75015	7.58534	1.855
	FBgn0262375	mir-1005	0	0	0	0
	FBgn0031596	CG15429	5.93286	1.03778	5.40674	4.40957
	FBgn0026319	Traf4	1.17089	0.887746	2.67731	0.254874
	FBgn0031597	CG17612	2.18635	1.91735	2.25103	3.44676
	FBgn0031598	CG3338	12.1593	10.9645	10.742	8.54173
	FBgn0261976	Psf2	4.77909	6.1302	3.78368	7.361
	FBgn0027560	Tps1	107.097	183.919	94.5561	209.223
	FBgn0031600	CG3652	32.3231	28.1739	34.0518	27.0141
	FBgn0022153	l(2)k05819	9.88923	7.44952	9.12278	8.6855
	FBgn0053003	CG33003	0	0	0	0
	FBgn0031601	Dim1	36.3915	20.0835	29.4034	21.3411
	FBgn0031602	CG15431	0	0.020197	0	0.0915685
	FBgn0262357	CG43055	0	0	0	0
	FBgn0051963	tRNA:CR31963	0	0	0	0
	FBgn0085207	CG34178	3.85874e-05	1.91174	5.09537e-05	8.75289
	FBgn0085206	CG34177	19.9396	0.815604	20.4386	1.16031
	FBgn0262358	CG43056	0	0	0	0
	FBgn0259958	Sfp24F	0	0	0.439562	0
	FBgn0031603	CG15432	22.1234	12.9721	21.2315	10.009
	FBgn0027609	morgue	10.3242	3.6565	6.69256	4.89376
	FBgn0031604	Elp3	8.00343	5.61443	7.57214	5.01664
	FBgn0025684	MFS18	16.3609	30.6057	11.6109	34.5006
	FBgn0031606	CG15439	3.63691	2.48187	3.09254	2.28554
	FBgn0031607	CG15440	17.2821	10.2863	15.6896	8.79908
	FBgn0040705	CG15434	10.0689	1.3951	4.81049	3.26455
	FBgn0019982	Gs1l	8.44041	19.9211	9.4039	15.3902
	FBgn0261606	RpL27A	1469.92	1915.49	1857.66	1769.16
	FBgn0065053	snoRNA:Me18S-C1831	0	0	0	0
	FBgn0053002	mRpL27	25.923	23.1304	27.9403	21.3077
	FBgn0031608	CG15435	5.49969	1.75976	3.73001	2.00135
	FBgn0031609	CG15443	11.1134	5.22563	10.7884	9.57965
	FBgn0031610	CG15436	6.28661	2.25002	3.43615	4.91388
	FBgn0031611	CG17840	2.09571	2.13992	3.41961	2.93579
	FBgn0011603	ine	5.44344	3.29982	1.73402	3.93916
	FBgn0053196	dp	1.25825	0.757146	0.532683	0.537408
	FBgn0031613	HP6	21.3932	5.94535	18.2629	13.8242
	FBgn0263869	CR43716	0	0	0	0
	FBgn0083938	BG642163	0	0.0926692	0	0
	FBgn0031617	CG15635	0	0	0	0
	FBgn0264342	CG43798	0	0	0	0
	FBgn0031619	CG3355	1.22788	1.15906	1.49667	0
	FBgn0031620	CG11929	16.5412	2.00781	9.36581	10.6343
	FBgn0000227	Bsg25A	0	0	0	0
	FBgn0031621	CG15634	1.65053	0.0890022	0.407941	0.608267
	FBgn0031622	CG3251	4.3697	0.822205	1.60088	1.53092
	FBgn0085380	CG34351	0	0	0.0567433	0.0838861
	FBgn0031623	Taf12L	37.3279	10.0731	40.0047	29.7132
	FBgn0031626	CG15631	12.8968	1.61138	10.0621	8.17284
	FBgn0031627	CG15630	0.193204	0	0	0.102663
	FBgn0260428	CG42523	47.5505	5.88274	45.4206	35.1592
	FBgn0031628	CG3294	2.05715	0.827882	2.59965	1.35253
	FBgn0031629	Clect27	12.4181	14.2294	18.2768	10.9715
	FBgn0031630	CG15629	0.89729	0.8087	0.41182	0.614137
	FBgn0031631	CG3225	3.34034	0.764491	2.73492	1.85257
	FBgn0263577	mir-4910	0	0	0	0
	FBgn0031632	CG15628	0.381682	0.167522	0.205806	0
	FBgn0031633	CG2976	38.4647	31.2275	36.2635	21.6102
	FBgn0263575	mir-4912	0	0	0	0
	FBgn0031634	Ir25a	0.172465	0.0403409	0.244513	0.0915746
	FBgn0031635	CG15626	9.38786	9.38251	12.6311	10.0101
	FBgn0031636	CG12194	1.13672	0.324944	1.38591	1.84587
	FBgn0031637	CG2950	24.8687	18.8508	26.3763	15.6169
	FBgn0031638	CG11927	12.7979	4.48808	10.5228	8.07073
	FBgn0031639	mRpS2	8.43114	15.5782	10.1096	13.4985
	FBgn0031640	CG11926	10.4576	8.59197	9.7143	9.31946
	FBgn0051660	pog	0.220774	0.0818582	0.0506245	0.123764
	FBgn0000286	Cf2	15.6874	9.18332	13.9205	12.3397
	FBgn0031643	CG3008	22.7704	15.9816	19.0405	15.2629
	FBgn0031644	CG15625	4.21354	0.0984278	4.05678	2.91696
	FBgn0031645	CG3036	58.6693	117.114	24.9901	94.3236
	FBgn0031646	CG2837	0.386029	1.08191	0.411053	0.308641
	FBgn0041150	hoe1	1.59561	2.28966	2.01705	4.35509
	FBgn0031649	hoe2	7.51352	5.10886	9.99243	5.17358
	FBgn0003372	Sgs1	505.078	309.786	421.264	326.566
	FBgn0031650	CG14044	0	0.198769	0	0
	FBgn0031651	mRpL24	19.7296	21.9414	21.9389	20.9445
	FBgn0015000	betaggt-I	12.2858	10.8443	10.4141	6.40671
	FBgn0031652	jet	3.27114	3.16462	3.16191	2.10034
	FBgn0031653	Jon25Biii	0.751062	1.05011	467.462	1.20365
	FBgn0031654	Jon25Bii	587.568	371.69	713.105	31.8441
	FBgn0020906	Jon25Bi	893.785	425.959	1279.65	61.6229
	FBgn0031655	Marcal1	2.94517	1.36128	1.77799	1.9471
	FBgn0083960	CG34124	0.925459	0.0928872	0.685633	0.884219
	FBgn0264372	CR43824	1.58129	0.369459	1.12859	0.631402
	FBgn0083961	CG34125	26.1117	23.9883	31.3091	16.9894
	FBgn0015834	Trip1	99.6901	112.058	117.328	98.8894
	FBgn0262467	Scox	18.1069	15.9432	16.5086	17.618
	FBgn0031657	CG3756	9.57536	3.46898	7.57815	6.33439
	FBgn0010607	l(2)05714	14.1467	10.7451	10.2685	11.3687
	FBgn0031659	CG14043	16.0683	10.0279	14.1185	12.8871
	FBgn0031660	mRpL28	28.1201	25.8311	20.0443	30.5637
	FBgn0031661	Gmd	16.3808	17.5138	15.6924	16.3214
	FBgn0031662	CG3792	45.2997	58.2514	36.712	42.6592
	FBgn0031663	CG8891	13.3997	14.5218	12.1472	10.0865
	FBgn0031664	CG8892	9.89851	3.24467	9.06734	6.73897
	FBgn0083962	CG34126	7.77697	7.86045	7.9909	7.79337
	FBgn0053113	Rtnl1	483.92	553.368	423.679	499.332
	FBgn0259719	Tfb5	36.49	26.6973	33.3157	40.6539
	FBgn0031670	CG3887	82.8722	60.6638	86.8383	58.729
	FBgn0016075	vkg	45.7543	131.279	16.1345	86.3103
	FBgn0000299	Cg25C	90.5329	237.219	42.5989	174.11
	FBgn0260470	SP555	6.83633	0.645012	4.66313	3.56982
	FBgn0053995	CG33995	23.7439	13.2648	25.4099	9.3621
	FBgn0031674	CG31919	11.1534	4.89433	12.3728	5.69469
	FBgn0031673	CG31650	18.2614	5.87932	13.1376	10.3722
	FBgn0031675	CG9121	8.13721	3.74575	5.65465	3.81165
	FBgn0022023	eIF-3p40	125.351	130.137	127.364	138.363
	FBgn0031676	CG14040	11.7081	7.49963	10.2615	7.90721
	FBgn0031677	CG14036	18.2474	4.36294	24.5574	10.19
	FBgn0014857	His3.3A	118.885	76.2321	140.437	76.7787
	FBgn0031678	CG31918	7.98713	4.68905	2.89143	5.02129
	FBgn0028694	Rpn11	78.6854	62.4922	86.7868	59.4271
	FBgn0028572	qtc	13.6303	8.12412	20.3125	7.49971
	FBgn0262213	mir-2495	0	0	0	0
	FBgn0264368	CR43820	9.24421	3.23077	11.9665	2.46958
	FBgn0261608	RpL37A	1238.88	1523.94	1836.81	1560
	FBgn0031681	pgant5	16.8864	13.1706	14.424	16.1587
	FBgn0031682	CG5828	20.4465	19.6513	23.9604	12.9385
	FBgn0031683	CG4230	13.1222	5.92058	13.6071	7.89761
	FBgn0031684	CG8680	95.974	90.9349	111.631	93.0821
	FBgn0261836	Msp-300	6.10799	3.7486	3.99842	4.59456
	FBgn0065083	snmRNA:765	0	0	0	0
	FBgn0065107	snmRNA:128	0	0	0	0
	FBgn0065104	snmRNA:158	0	4.64261	0	0
	FBgn0082990	snoRNA:Psi28S-2263	19.423	0	0	0
	FBgn0083028	snoRNA:Psi18S-525k	0	0	0	0
	FBgn0031688	Cyp28d2	1.39668	4.37012	0.576309	0.514431
	FBgn0031689	Cyp28d1	76.6354	35.879	56.1888	38.1614
	FBgn0031690	CG7742	16.0579	2.12514	11.0578	11.1203
	FBgn0250847	CG14034	0	0	0	0
	FBgn0031692	TpnC25D	0.692531	1.69089	0	1.11289
	FBgn0046776	CR14033	4.74348	2.24494	3.68593	3.59734
	FBgn0003716	tkv	12.5287	6.89564	11.2214	6.26089
	FBgn0051971	tRNA:CR31971	0	0	0	0
	FBgn0051914	tRNA:CR31914	0	0	197.822	0
	FBgn0031693	Cyp4ac1	51.7593	79.3103	43.0202	83.7327
	FBgn0031694	Cyp4ac2	6.50384	4.00969	2.3076	2.67867
	FBgn0031695	Cyp4ac3	3.42068	6.19641	4.82917	3.82247
	FBgn0000228	Bsg25D	2.74953	3.37119	4.58739	3.10192
	FBgn0031696	Bub1	5.90858	2.78706	4.85178	4.91751
	FBgn0016076	vri	13.9005	7.09337	11.1072	8.54461
	FBgn0031697	CG14024	0.1321	0	0	0
	FBgn0031698	Ncoa6	3.073	2.30135	2.63374	3.14648
	FBgn0015031	cype	247.73	409.579	195.36	314.71
	FBgn0031700	CG14022	0	0	0.718852	0
	FBgn0031701	TotM	0	0	0	0
	FBgn0031702	fusl	51.4102	22.495	63.1684	21.6749
	FBgn0031703	CG12512	7.57555	23.3	3.37983	18.5084
	FBgn0016920	nompC	0.0791617	0.0713967	0.145244	0
	FBgn0262097	CG42850	14.9504	2.4838	9.88581	7.38873
	FBgn0016660	H15	0.539765	0	0.435818	0.107566
	FBgn0263866	CR43713	0	0	0	0
	FBgn0263867	CR43714	0	0	0	0
	FBgn0263868	CR43715	0	0	0	0
	FBgn0051647	CR31647	0	0	0	0
	FBgn0086033	snoRNA:Me28S-A2486	0	0	0	0
	FBgn0261963	mid	0.328123	0.114955	0.264674	0.261281
	FBgn0031707	CG14020	3.34732	0.879691	5.67019	4.45621
	FBgn0031708	CG7382	31.6738	19.5844	38.4981	20.5862
	FBgn0000318	cl	171.318	138.384	213.661	116.907
	FBgn0031710	CG7371	12.1426	7.83448	11.3915	8.44835
	FBgn0031711	CG6907	19.5798	14.0333	20.544	14.9386
	FBgn0051989	Cap-D3	1.65561	1.07562	1.12288	1.65588
	FBgn0031715	tomb	6.87014	0.857737	5.46258	3.14528
	FBgn0031716	CG14015	0	0.0571569	0.0875824	0.129908
	FBgn0051648	CG31648	8.34852	8.36471	7.66767	5.42022
	FBgn0051915	CG31915	17.6456	43.7665	18.5533	43.0708
	FBgn0031713	CG7277	14.5328	10.5859	14.1345	10.2507
	FBgn0014189	Hel25E	52.0579	51.6081	44.9978	42.713
	FBgn0002525	Lam	21.6715	10.0805	14.4802	9.65526
	FBgn0031717	Oscillin	216.973	96.1335	291.943	98.6021
	FBgn0031718	CG14014	0.339289	0.237618	0.362048	0.271245
	FBgn0031719	CG18269	0.435308	0.152269	0	0.348485
	FBgn0031720	CG14013	13.2794	0.725958	11.2551	9.96351
	FBgn0031721	CG14017	4.82335	0.900975	5.49423	2.57005
	FBgn0004620	GluRIIA	0.938868	0.0366251	0.281138	0.249357
	FBgn0020429	GluRIIB	0.115713	0.121861	0.124676	0.0922126
	FBgn0041719	snRNA:U4:25F	0	0	0	0
	FBgn0031722	CG14011	9.12592	0.518423	5.81976	4.73713
	FBgn0031723	CG7251	17.4801	2.0774	14.0059	6.98457
	FBgn0031724	CG18266	22.9098	1.73168	16.3272	13.8663
	FBgn0031725	CG14010	0	0	0	0.241397
	FBgn0031726	Cyp6a16Psi	0.475759	0.833924	0.127475	0
	FBgn0051646	CG31646	0.118939	0	0.256268	0.189576
	FBgn0262256	mir-959	0	0	0	0
	FBgn0262321	mir-960	0	0	0	0
	FBgn0262239	mir-961	0	0	0	0
	FBgn0262200	mir-962	0	0	0	0
	FBgn0262333	mir-963	0	0	0	0
	FBgn0262243	mir-964	0	0	0	0
	FBgn0031728	Hsp60C	58.1638	6.83085	55.764	34.2797
	FBgn0031729	CG12511	3.24537	0	2.89527	2.99008
	FBgn0031730	CG7236	0.492214	0.0862608	0.659204	0.196476
	FBgn0031731	CG14007	0	0	0.204053	0
	FBgn0054011	CG34011	0.203014	0.142073	0.432022	0
	FBgn0031732	CG11149	0.625408	0.720214	1.66293	0
	FBgn0024191	sip1	2.75025	1.60883	2.6793	1.56584
	FBgn0031736	CG11030	6.53357	5.13838	5.6329	6.7924
	FBgn0031733	CG14006	6.13971	0.558088	4.63087	2.72255
	FBgn0031734	CG11147	0.766265	0.579335	0.55978	0.187877
	FBgn0031735	CG11029	0.0986881	0.692247	0.84765	0.157474
	FBgn0031737	obst-E	4.73321	7.17945	1.88958	18.6242
	FBgn0031738	CG9171	3.89441	2.55846	2.30879	2.31859
	FBgn0051912	CR31912	4.0831	2.12942	2.47163	1.50379
	FBgn0051913	CG31913	11.0734	0.823808	7.49964	4.90647
	FBgn0031739	CG14005	2.37585	1.6653	1.83696	2.55014
	FBgn0031740	CG7239	5.71334	3.64952	4.38024	1.79094
	FBgn0031741	CG11034	3.70995	0.781129	11.7355	1.65641
	FBgn0262999	CG43307	0	0	0	0
	FBgn0051644	CG31644	29.2305	3.60168	26.6441	17.892
	FBgn0085410	TrissinR	0.0607961	0	0	0
	FBgn0031745	CG8965	0.474933	0.499929	1.10668	0
	FBgn0259959	Sfp26Ac	0	0	0	0
	FBgn0262814	CG43185	0	0	0	0
	FBgn0031746	CG9029	0	0	0	0
	FBgn0002856	Acp26Ab	0	0	0	0
	FBgn0002855	Acp26Aa	0	0	0	0
	FBgn0031747	CG9021	232.777	0.335514	173.24	0
	FBgn0264352	CR43808	0.164346	0	0	0
	FBgn0043362	bchs	2.07131	1.09881	3.20888	0.744511
	FBgn0031749	CG14000	2.9851	0.285295	1.74256	0.433479
	FBgn0031751	CG9016	67.5458	9.31027	53.7902	31.1916
	FBgn0264547	CR43926	0.558383	0	0.885397	0
	FBgn0015381	dsf	0.111944	0	0.0603158	0
	FBgn0261055	Sfp26Ad	2.06737	0.961696	2.12909	1.12633
	FBgn0001128	Gpdh	109.367	570.65	51.1052	418.229
	FBgn0031752	CG9044	10.4112	8.25374	11.4627	9.68634
	FBgn0031753	CG13999	1.86669	0.392046	1.19339	0.597221
	FBgn0040949	CG13998	0	0	0	0
	FBgn0003980	Vm26Ab	0	0	0	0.583213
	FBgn0086266	Vm26Ac	0	0	0	0
	FBgn0003979	Vm26Aa	0	0.488344	0	0
	FBgn0086265	psd	0	0	0.162509	0
	FBgn0031756	CG13992	0.0752704	0.0528259	0	0
	FBgn0031757	Ucp4C	6.95541	0.66442	6.92284	3.28468
	FBgn0263442	CR43465	0	0	0	0
	FBgn0031758	Ucp4B	4.25654	0.627868	4.35634	3.25478
	FBgn0000308	chic	644.669	360.627	748.977	386.065
	FBgn0001942	eIF-4a	441.475	514.703	487.919	519.013
	FBgn0001941	ifc	19.0273	22.6524	18.913	18.8265
	FBgn0031759	lid	6.74169	5.13703	5.1161	4.89278
	FBgn0031760	Tsp26A	4.89435	2.8335	1.07131	0.934056
	FBgn0264448	CR43866	3.68871	1.77042	4.58633	2.01353
	FBgn0001089	Gal	2.96109	2.33966	4.06213	1.06511
	FBgn0031762	CG9098	2.04454	1.12632	1.78487	0.542719
	FBgn0001170	H2.0	0.108383	0.228027	0.232535	0
	FBgn0031763	CG13996	0	0	0	0
	FBgn0031764	CG9107	8.15814	8.09706	10.062	7.22201
	FBgn0031765	CG9109	0	0	0	0
	FBgn0025742	mtm	16.0562	11.0893	24.7612	9.9221
	FBgn0031766	CG9117	6.20404	4.9599	6.11994	3.1932
	FBgn0051643	CG31643	2.18413	2.03074	1.39913	1.59948
	FBgn0000052	ade2	66.1609	33.2628	67.6523	38.2723
	FBgn0262317	mir-966	0	0	0	0
	FBgn0029161	slmo	55.5281	63.5754	56.7032	69.5814
	FBgn0085208	CG34179	0.839432	0.442339	0.225882	0.669612
	FBgn0031768	CG12393	12.0667	6.98933	14.502	9.53695
	FBgn0031769	CG9135	16.5325	8.84897	12.5687	3.96434
	FBgn0031770	CG13995	0	0	0.054069	0
	FBgn0085209	CG34180	0	0	0	0
	FBgn0031771	CG9140	47.2109	65.7343	35.9346	56.7492
	FBgn0031772	CG13994	29.4982	13.4455	26.5611	18.2487
	FBgn0031773	Fbw5	5.7215	5.24672	6.64721	5.10934
	FBgn0031774	CG9147	10.8179	4.79498	9.95531	8.65188
	FBgn0031775	CG9150	0.220049	0.153936	0	0
	FBgn0031776	CG13993	73.9518	39.0624	71.3346	49.473
	FBgn0031777	CG9154	10.2294	9.92478	12.3101	12.7629
	FBgn0028419	Kr-h2	58.1557	48.9368	45.0421	44.7758
	FBgn0264345	CR43801	0	0	0	0
	FBgn0031778	CR9162	0	0	0.162058	0
	FBgn0028420	Kr-h1	5.78072	3.74114	4.69535	4.22625
	FBgn0031779	CG9175	14.95	14.3422	12.24	15.8978
	FBgn0051641	stai	31.4177	8.22822	24.361	11.8444
	FBgn0051642	CG31642	16.1242	4.57577	9.63516	11.9944
	FBgn0031781	Arc-p20	46.0539	38.2933	78.6307	29.1778
	FBgn0031782	WDR79	4.06139	2.13597	2.90344	2.52127
	FBgn0261683	CG42730	3.11383	0.956305	2.16547	2.58535
	FBgn0031784	CG9222	19.1121	3.64879	16.5635	7.87895
	FBgn0031785	CG13991	5.06713	0.376921	3.12283	2.75318
	FBgn0040950	Muc26B	0	39.5262	78.6837	0.172057
	FBgn0051639	CG31639	77.2035	13.0609	74.4063	47.3681
	FBgn0031786	CG13989	23.1953	1.39329	19.2489	11.5857
	FBgn0085409	CG34380	0.571944	0.27458	0.658027	0.0478703
	FBgn0026755	Ugt37b1	0	1.37185	0.110484	0.164284
	FBgn0053531	Ddr	0.210432	0	0.0507283	0
	FBgn0031791	CG9486	73.9265	18.1183	158.364	22.8485
	FBgn0031792	CG13983	0	0	0	0
	FBgn0261699	CR42735	0.612424	0.424798	0	0
	FBgn0264543	CG43922	30.0352	4.0323	31.2374	21.7156
	FBgn0260452	CG13984	8.45535	1.1799	5.69177	1.08677
	FBgn0021873	Gef26	7.79023	4.41256	6.29709	5.01382
	FBgn0031799	Pez	2.92151	2.26257	3.23428	1.84952
	FBgn0015623	Cpr	64.2151	94.9816	30.8841	79.0434
	FBgn0031800	CG9497	0.20129	0.280548	2.99653	0
	FBgn0031801	CG9498	0.962249	8.77036	0.257796	3.45686
	FBgn0031802	ppk7	0	0	0	0
	FBgn0031803	ppk14	0	0	0	0
	FBgn0031804	CG9500	3.2751	0	0.800811	1.61505
	FBgn0031805	CG9505	7.51753	7.06975	6.47013	7.43225
	FBgn0043854	slam	0.409241	0.632351	0.309115	0.782332
	FBgn0259714	CG42368	3.41637	2.39879	4.73422	2.93831
	FBgn0031808	CG9507	7.54437	5.52177	7.76343	4.14016
	FBgn0259716	CG42370	169.449	104.435	211.875	132.75
	FBgn0259715	CG42369	0.923181	2.9581	5.08281	6.1086
	FBgn0031811	CG13982	0.194456	0.227507	0.139595	0.30999
	FBgn0011722	Tig	133.239	164.967	86.3879	158.917
	FBgn0263278	l(2)k11101	5.16341	6.33918	5.44774	5.14849
	FBgn0031813	CG9527	69.7272	64.9075	80.375	79.1921
	FBgn0031814	retm	10.7185	9.9177	12.0447	12.91
	FBgn0031815	frj	19.1491	17.9367	18.3206	19.453
	FBgn0031816	CG16947	5.76049	4.96391	6.90622	2.74307
	FBgn0031817	CG9531	11.5477	4.09523	6.41494	6.88371
	FBgn0259749	mmy	32.7173	34.1762	35.0285	29.3839
	FBgn0031818	CG9536	21.7495	30.8237	20.4198	32.6387
	FBgn0086357	Sec61alpha	238.508	418.028	170.832	370.228
	FBgn0031820	DLP	6.81535	3.84404	5.5135	5.58842
	FBgn0031821	CG9542	72.9471	74.7395	54.9706	72.9121
	FBgn0027496	epsilonCOP	56.8606	60.5185	61.0236	51.1631
	FBgn0031822	CG9548	15.5457	9.51083	16.6334	14.3587
	FBgn0051638	CG31638	3.67065	2.25216	3.39818	2.01011
	FBgn0031824	CG9547	60.7238	59.1112	55.6059	57.2479
	FBgn0031826	CG9550	10.4426	1.32119	7.90977	4.40297
	FBgn0051637	CG31637	4.941	4.3244	6.28824	3.37563
	FBgn0000320	eya	2.72107	0.743901	0.845698	1.7518
	FBgn0031829	osm-6	1.83002	0.320532	0.325945	0.487434
	FBgn0031830	CoVb	135.32	230.02	117.458	183.219
	FBgn0031831	CG11043	23.1497	3.85661	24.334	19.9884
	FBgn0031832	CG9596	3.4831	4.88364	3.99782	4.7674
	FBgn0263916	Ent2	17.7279	24.7007	16.8791	26.526
	FBgn0031834	CG13766	1.95949	2.69521	1.68601	2.87491
	FBgn0031835	CG11319	0.215258	0.0504014	0.0774589	0.0571446
	FBgn0031836	CG11050	16.9604	30.4914	14.8329	30.4551
	FBgn0031837	CG11320	0	0	0	0.223593
	FBgn0085374	CG34345	0	0	0	0
	FBgn0051634	Oatp26F	0	0	0.077063	0
	FBgn0051635	CG31635	5.15857	2.38111	3.96406	4.51727
	FBgn0031842	Tango1	19.9228	23.9688	17.916	23.4503
	FBgn0051633	CG31633	7.56975	4.86433	7.83765	6.85004
	FBgn0051636	CG31636	16.1415	5.6555	58.8768	11.0529
	FBgn0028467	CG11070	12.7799	8.38063	13.5115	11.4103
	FBgn0031844	CG13771	2.18088	0.631512	2.34293	1.23323
	FBgn0000392	cup	20.273	3.187	14.6221	10.4534
	FBgn0085339	CG34310	40.8074	33.9588	37.4314	38.0735
	FBgn0000351	cort	0.456067	0.15989	0.366749	0.181983
	FBgn0263200	Galt	26.0976	45.1811	27.0103	44.6806
	FBgn0028990	Spn27A	45.7389	44.6238	57.0839	53.2827
	FBgn0031848	CG11329	2.73072	1.43247	3.38266	0.364428
	FBgn0028703	Nhe3	8.53692	7.01413	10.2679	7.67803
	FBgn0031849	CG11327	27.5816	5.11318	18.4026	18.3903
	FBgn0031850	Tsp	6.77254	1.10374	5.92331	3.6108
	FBgn0025595	GRHR	56.5908	82.0938	50.5534	68.1737
	FBgn0031851	CG11188	5.47638	5.31808	4.06822	7.73169
	FBgn0025777	homer	18.2168	7.28255	14.0197	10.2814
	FBgn0046704	Liprin-alpha	4.35114	2.62609	3.34222	3.65503
	FBgn0031853	TTLL3B	10.7853	1.46692	8.57972	6.02971
	FBgn0031854	TTLL3A	0.0572353	0	0	0
	FBgn0031855	CG11221	0.460354	0.48461	0.330134	0.244705
	FBgn0051910	CG31910	14.3195	2.97363	18.0608	9.31569
	FBgn0086034	snoRNA:Me28S-G2743	0	0	0	0
	FBgn0031856	CG11322	6.67821	0.851666	3.80147	4.19821
	FBgn0031857	CG11321	0	0.194359	0	0.443167
	FBgn0031858	CG17378	8.2552	0.929168	6.49376	6.21122
	FBgn0015776	nrv1	28.1857	36.3354	24.3639	19.4908
	FBgn0015777	nrv2	31.298	13.1454	22.0165	20.7428
	FBgn0263585	CR43610	9.08941	0.694827	7.07592	1.6476
	FBgn0051631	tRNA:CR31631	0	0	0	0
	FBgn0042189	CG17376	284.969	38.0328	240.613	173.649
	FBgn0031859	CG17377	111.038	12.5607	85.4828	67.4926
	FBgn0031860	CG11236	6.25779	6.29422	2.939	2.56487
	FBgn0031861	CG17375	10.8285	1.40476	7.89115	3.85464
	FBgn0051632	sens-2	0.0501954	0.0352476	0.216479	0
	FBgn0017551	Rca1	7.7124	2.53996	5.38631	5.22363
	FBgn0086451	l(2)k09022	1.63159	1.89864	1.12938	2.19212
	FBgn0031865	Nha1	6.59908	2.73524	5.09632	1.4169
	FBgn0031866	neuroligin	0.348218	0.129655	0.0332189	0.110923
	FBgn0262205	mir-932	0	0	0	0
	FBgn0042092	CG13773	6.24205	2.24779	3.04264	4.56363
	FBgn0031868	Rat1	6.41926	4.26561	5.126	5.38978
	FBgn0011737	wee	10.9042	3.54832	7.84971	6.9094
	FBgn0028554	x16	10.527	7.04115	5.56349	5.96502
	FBgn0052829	CG32829	0	0.16428	0.249269	1.12892
	FBgn0026196	nop5	19.9353	15.0859	12.2311	17.8636
	FBgn0263467	snoRNA:nop5-x16-a	0	0	0	0
	FBgn0004838	Hrb27C	123.106	126.864	103.419	134.472
	FBgn0262877	CG43232	1.69477	0	1.71346	1.37883
	FBgn0031869	CG18304	1.17964	0.22096	0.594726	0.584295
	FBgn0031871	CG10158	22.2382	6.45808	18.693	11.9423
	FBgn0031872	ihog	3.56989	1.59849	3.23495	0.989353
	FBgn0031873	Gas41	13.6565	7.1613	13.1871	8.59642
	FBgn0020616	SA	4.61056	2.94349	3.41552	1.92927
	FBgn0031874	CG13775	0.581017	0.747213	0.311954	0.309022
	FBgn0031875	CG3430	2.77514	1.31895	1.53904	1.14247
	FBgn0031876	Atac1	4.94438	4.13389	6.30273	3.31429
	FBgn0031877	CG10399	5.24805	7.7291	3.66544	5.49941
	FBgn0031878	sip2	38.0458	7.42746	29.2713	22.8801
	FBgn0021944	Coprox	23.1751	22.7414	22.6827	27.4972
	FBgn0026170	smt3	220.362	158.726	170.824	165.738
	FBgn0016978	snRNP-U1-70K	14.1388	12.8546	15.7912	15.4516
	FBgn0262616	CR43142	0	0	2.25569	2.78577
	FBgn0031879	uif	3.35791	1.08789	3.0993	0.495681
	FBgn0263026	CG43321	5.79923	0.44665	5.94923	2.0878
	FBgn0263027	CG43322	3.67588	0.927239	3.93012	3.05427
	FBgn0000053	ade3	307.248	96.7849	300.031	87.2189
	FBgn0003046	Pcp	30.3867	13.1067	39.302	12.43
	FBgn0051908	CG31908	29.5482	17.2013	31.3138	17.314
	FBgn0031881	CG3476	8.53842	3.61113	4.12886	6.69564
	FBgn0031882	Rab30	8.03724	3.2641	8.20665	3.85053
	FBgn0031883	CG11266	21.4848	17.5713	17.5767	16.1302
	FBgn0262872	milt	14.167	9.05287	12.8215	11.0422
	FBgn0031885	Mnn1	2.39295	1.54813	2.16059	1.49599
	FBgn0051907	CG31907	44.9071	6.10454	41.8439	28.8031
	FBgn0040954	CG13779	257.754	207.78	325.477	203.528
	FBgn0031886	Nuf2	4.48391	1.41897	3.71228	3.00436
	FBgn0031887	CG11289	0	0.0843937	0	0
	FBgn0031888	Pvf2	1.3651	0.478919	1.19222	0.272179
	FBgn0085407	Pvf3	2.15702	0.508279	1.06807	1.03923
	FBgn0031893	CG4495	14.8013	9.417	13.8265	10.414
	FBgn0031894	CG4496	1.94709	0.601225	2.76443	0.621017
	FBgn0031895	CG4497	4.53823	1.26487	3.52079	2.87269
	FBgn0031896	CG4502	23.279	6.03331	15.6998	13.5401
	FBgn0031897	CG13784	37.771	36.2338	37.4456	42.5661
	FBgn0263133	ico	3.86308	4.40627	2.00489	5.71908
	FBgn0259111	Ndae1	13.551	14.5064	10.145	6.1657
	FBgn0264343	CG43799	0	0.333926	0	0.382526
	FBgn0264344	CG43800	42.1764	6.89672	14.907	25.402
	FBgn0031900	CG13786	0	0	0	0
	FBgn0010453	Wnt4	0.764444	0.35786	1.09887	0.487259
	FBgn0051909	CG31909	37.1076	4.12087	19.5597	25.9424
	FBgn0004009	wg	1.11214	0.287667	0.504514	0.0932941
	FBgn0031902	Wnt6	1.31291	0.779219	0.867276	0.483489
	FBgn0031903	Wnt10	0.312245	0	0	0
	FBgn0002938	ninaC	0.0344545	0.0590241	0.111599	0
	FBgn0031904	CG5149	10.2031	7.74877	9.2501	5.22703
	FBgn0031905	CG5155	8.39486	0.770815	7.3413	4.62941
	FBgn0031906	CG5160	0.323489	0.679803	0.863591	1.80997
	FBgn0031907	CG5171	8.59054	5.92237	5.582	3.4429
	FBgn0031908	CG5177	76.735	24.8058	20.7868	30.0951
	FBgn0031909	CG5181	11.0274	4.67875	6.96942	4.71642
	FBgn0031910	CG15818	24.4815	7.49363	64.4192	3.82123
	FBgn0028387	chm	3.05976	2.14822	3.11018	1.84024
	FBgn0264439	CR43857	0	0.149433	0.227048	0.227999
	FBgn0262453	mir-275	0	0	0	0
	FBgn0262458	mir-305	0	0	0	0
	FBgn0031912	CG5261	46.8154	110.783	44.9782	94.6399
	FBgn0031913	CG5958	957.868	702.675	1389.03	727.139
	FBgn0031914	CG5973	4.49237	4.3483	7.25199	1.09392
	FBgn0025697	santa-maria	10.5029	0.275022	66.9347	0.249993
	FBgn0041247	Gr28a	0	0	0	0
	FBgn0045495	Gr28b	0	0	0.121486	0
	FBgn0031918	CG6055	0	0	1.13353	0.301034
	FBgn0260486	CG42533	1.24653	0.585914	0.975974	0.731545
	FBgn0031920	CG6441	13.3588	1.36503	10.9987	7.43351
	FBgn0011283	Pbprp5	0	0	0	0
	FBgn0085403	Rapgap1	3.17986	2.49211	2.17226	2.35394
	FBgn0031923	CG13791	0	0	2.19973	0
	FBgn0083141	Spn7	0	0	0.161755	0
	FBgn0031925	Cyp4d21	0	0.0684661	0.104802	0
	FBgn0031926	CG6739	0.824275	0.667665	0.61456	0.202147
	FBgn0264087	Slob	0.151482	0.0250773	0.0825137	0.0568639
	FBgn0040299	Myo28B1	1.55876	0.952628	1.45388	0.687004
	FBgn0031929	CG18585	0	0.0958278	2.78002	0
	FBgn0031930	CG7025	0	0.0961555	0.146813	0
	FBgn0262880	CG43235	1.94303	1.35613	1.70515	0
	FBgn0041182	TepII	109.352	111.512	99.5228	140.816
	FBgn0041181	TepIII	2.0885	1.34879	1.20026	0.965731
	FBgn0031934	Ntl	9.67364	1.10153	7.69948	4.57244
	FBgn0012018	tRNA:Y1:28C	0	0	0	0
	FBgn0053296	CG33296	0.377741	0.132496	0.202855	0.301339
	FBgn0031935	CG13793	0.366701	0.192947	0.29546	0.292509
	FBgn0031936	CG13794	0.737804	1.05564	1.2594	0.946132
	FBgn0031937	CG13795	66.6815	80.0274	57.0325	97.4207
	FBgn0031939	CG13796	44.4601	14.3561	69.7117	12.7596
	FBgn0260479	CG31904	12.7168	4.28292	17.376	3.38333
	FBgn0014454	Acp1	0.696556	0.0811913	0.123216	0
	FBgn0031940	CG7214	6.11016	5.05547	3.55163	2.36943
	FBgn0031941	CG7211	27.1032	2.25932	29.1502	9.63459
	FBgn0031942	CG7203	0	0	0.325645	0.495767
	FBgn0031944	CG7196	16.4292	2.95073	14.6482	10.8483
	FBgn0031943	CG14538	0	0	0	0
	FBgn0031945	CG7191	0.556237	0.468075	1.31241	0.355156
	FBgn0020880	CG7179	0.0784182	0	0.253025	0
	FBgn0003961	Uro	73.606	180.092	25.2244	57.6232
	FBgn0031946	CG7164	23.0611	3.17841	22.6471	14.2312
	FBgn0031947	CG7154	6.19444	4.01105	3.62801	4.69708
	FBgn0031948	CG7149	15.7454	14.097	14.6875	11.3805
	FBgn0025687	LKR	16.9377	27.4349	16.5788	23.0169
	FBgn0031950	Herp	29.4979	34.1064	26.5293	36.7835
	FBgn0031951	r2d2	13.857	11.9579	15.5918	13.5498
	FBgn0031952	cdc14	13.705	4.97342	10.1962	9.92172
	FBgn0261800	LanB1	33.1224	26.8673	28.0785	20.1971
	FBgn0027515	CG7115	13.2371	5.99056	13.4721	8.68627
	FBgn0020618	Rack1	987.368	1414.59	1216.99	1251.08
	FBgn0004177	mts	101.728	87.0375	96.0228	84.1906
	FBgn0262546	CG43100	18.0224	2.82464	5.39407	9.40355
	FBgn0031954	CG14537	6.9555	0.186947	3.67999	5.57617
	FBgn0031955	CG14535	0.0590086	0.0414555	0.127474	0
	FBgn0040099	lectin-28C	124.729	122.361	182.194	82.3722
	FBgn0031957	TwdlE	3.03138	2.99362	3.98082	1.54079
	FBgn0045038	Proct	0.267216	0	0	0.142091
	FBgn0011861	tRNA:G3:28D	0	0	0	0
	FBgn0031959	spz3	0.676132	0.284761	0.436734	0.215587
	FBgn0031961	CG7102	1.53985	0.360148	0.275857	0
	FBgn0261790	SmE	55.7161	36.2156	56.1377	39.1506
	FBgn0083968	CG34132	39.1908	56.1352	19.9338	46.2794
	FBgn0051902	Spn28Da	0	0	0	0
	FBgn0053121	Spn28Db	0	0	0	0
	FBgn0085450	Snoo	1.79203	1.78343	1.21958	2.20097
	FBgn0031968	CG7231	27.3318	26.9485	40.678	27.6054
	FBgn0031969	pes	7.43118	5.92931	9.82435	6.62293
	FBgn0031970	CG7227	3.04475	0.923894	3.89298	0.524975
	FBgn0031971	CG7224	164.326	150.822	188.836	211.833
	FBgn0031972	Wwox	9.99093	7.25514	14.7871	9.49492
	FBgn0031973	Spn28D	18.1193	19.983	13.5261	12.9868
	FBgn0031974	CG12560	2.01989	2.4031	4.29878	9.69779
	FBgn0054010	CG34010	0.474003	0.165733	0.502879	1.51869
	FBgn0031975	Tg	5.69366	3.14173	4.25316	2.43171
	FBgn0031976	CG7367	0.251889	0.103692	0.316419	0
	FBgn0044323	Cka	17.8391	10.6912	15.8996	12.5461
	FBgn0031977	baf	65.4255	36.9971	59.855	45.5908
	FBgn0031979	CG7429	9.84985	6.16135	13.2165	6.00285
	FBgn0031980	RpL36A	1629.76	1977.14	2293.35	1930.02
	FBgn0065055	snoRNA:Psi28S-2648	0	0	0	0
	FBgn0031981	CG7466	3.17234	1.79244	1.94803	1.97944
	FBgn0011230	poe	10.6855	8.55188	11.6805	12.927
	FBgn0013531	MED20	10.3149	3.67618	8.19246	6.80042
	FBgn0010287	Trf	7.80855	2.80252	5.11412	4.16535
	FBgn0020240	Mcr	9.68418	6.01324	7.3808	7.04362
	FBgn0261822	Bsg	155.389	111.876	135.528	124.715
	FBgn0031985	mon2	7.49558	7.0881	6.0034	6.17256
	FBgn0031986	CG8673	8.12983	0.735295	5.19437	3.97914
	FBgn0031987	CG12375	33.0868	29.7788	32.8467	35.705
	FBgn0031988	CG8668	12.7644	5.65322	11.9947	4.84863
	FBgn0031990	CG8552	18.4174	19.4898	10.8605	22.166
	FBgn0263561	mir-4984	0	0	0	0
	FBgn0261830	CG42762	0	0	0	0
	FBgn0261831	CG42763	0.350053	0.244178	0	0
	FBgn0263256	CG43394	1.78471	0.812519	1.41512	0.616058
	FBgn0051606	CG31606	0	0	0	0
	FBgn0261064	Rbsn-5	10.2522	5.63126	8.20493	6.94456
	FBgn0031992	CG8498	157.031	120.513	184.996	120.038
	FBgn0031993	Piezo	4.70135	4.77222	3.99217	4.6911
	FBgn0013442	fos28F	0	0	0.233479	0
	FBgn0083970	CG34134	5.84412	3.32234	6.04902	1.71641
	FBgn0031995	CG8475	31.2279	22.5819	36.9743	15.1132
	FBgn0031996	CG8460	19.6412	21.9307	21.1656	22.719
	FBgn0031997	CG8455	8.70363	4.02371	7.46329	6.24722
	FBgn0031998	CG8451	23.75	17.2172	14.9126	21.3546
	FBgn0031999	CG8419	0.105837	0.0743152	0.114084	0.168661
	FBgn0003607	Su(var)205	67.5507	43.306	59.7488	43.6681
	FBgn0015299	Ssb-c31a	55.8929	30.3607	51.1184	26.3693
	FBgn0032000	CG8372	43.084	30.5106	66.62	34.4627
	FBgn0032001	CG8360	50.0928	43.8398	50.9539	40.2055
	FBgn0032002	CG8353	4.79421	13.7944	12.1602	24.4255
	FBgn0032003	CG8349	11.6111	1.80523	9.37057	5.85215
	FBgn0032004	CG8292	15.459	0.973087	13.5257	8.33271
	FBgn0032005	Snx6	78.308	49.4144	97.4939	53.9327
	FBgn0032006	Pvr	21.1246	23.5723	18.403	20.1598
	FBgn0028987	Spn2	0.310932	0.108913	0	0.248475
	FBgn0262943	CR43262	0	0	0	0
	FBgn0032008	CG14277	0.646368	0	0	0
	FBgn0262359	CG43057	0	0	0	0
	FBgn0032010	CG8086	9.30776	1.62233	8.92119	5.30977
	FBgn0262374	mir-2b-1	0	0	0	0
	FBgn0003502	Btk29A	9.83194	3.63085	5.4703	3.91897
	FBgn0011902	tRNA:K5:29A	0	0	0	0
	FBgn0264083	CR43752	0	0	0	0
	FBgn0261020	wol	58.0503	53.183	56.3586	40.336
	FBgn0032013	Scgalpha	0.868858	0.658823	0.815529	0.375018
	FBgn0032014	CG7840	10.0396	8.18467	11.5962	12.3664
	FBgn0032015	CG7830	109.263	116.626	82.9939	99.2708
	FBgn0032016	CG7818	7.58667	4.9511	5.88201	4.38717
	FBgn0032017	CG7810	7.46359	3.65142	4.97122	6.97427
	FBgn0032018	CG7806	9.55557	7.06458	10.931	7.13071
	FBgn0262598	mtsh	8.56135	1.30848	3.86459	4.72661
	FBgn0032020	CG7787	12.9526	8.26488	14.2357	8.00648
	FBgn0032021	CG7781	4.07205	8.2973	0.936986	6.65204
	FBgn0032022	CG14275	3.60848	3.02781	5.10662	4.23964
	FBgn0032023	CG14274	0.112341	0	0	0.179329
	FBgn0032024	CG14273	42.3195	54.1506	11.666	13.713
	FBgn0032025	CG7778	16.5596	7.77008	12.5018	7.04082
	FBgn0051901	Mur29B	16.064	7.49815	37.7983	4.24136
	FBgn0032026	CG7627	34.8978	19.2349	29.6573	18.4449
	FBgn0010265	RpS13	1432.93	1781.79	1758.48	1683.38
	FBgn0261437	CSN8	22.6632	20.6983	18.9375	17.1323
	FBgn0260439	Pp2A-29B	62.0734	43.4164	53.9193	40.602
	FBgn0032029	CG17292	51.4605	50.7356	48.6705	46.6581
	FBgn0032030	Wdr82	18.3838	12.7491	24.1292	13.8519
	FBgn0032031	CG13390	3.21172	3.32163	5.22988	2.19977
	FBgn0032032	CG17294	12.5584	10.0077	10.9047	8.65556
	FBgn0027094	Aats-ala	24.8391	28.7906	15.8855	26.9622
	FBgn0032033	CG13392	4.50825	5.30234	2.95903	7.20281
	FBgn0032034	Rcd4	6.44529	7.41133	5.42442	5.68592
	FBgn0263852	l(2)k12914	120.663	150.661	111.92	116.14
	FBgn0032036	CG13384	9.07383	9.16303	10.761	9.00913
	FBgn0262001	CG42819	1.90441	0	0.399174	0.61268
	FBgn0041717	snRNA:U6atac:29B	0	0	0	0
	FBgn0262002	CG42820	18.0909	2.6111	14.5215	12.7946
	FBgn0015583	Acp29AB	0	0	0	0
	FBgn0040098	lectin-29Ca	0	0	0	0
	FBgn0040958	Peritrophin-15b	36.2285	179.462	481.158	0.603962
	FBgn0040959	Peritrophin-15a	223.83	844.208	1542.57	2.92803
	FBgn0032039	CG13385	6.46362	0.679132	4.83139	3.35801
	FBgn0032040	CG13386	0	0	0	0.381952
	FBgn0051898	CG31898	0.764517	0.535165	0.407146	0.305785
	FBgn0001084	fy	2.34737	0.98752	1.50969	0.562128
	FBgn0020497	emb	16.6808	14.0393	12.6319	13.1373
	FBgn0014417	CG13397	6.41559	9.87748	8.33569	22.9705
	FBgn0032042	CG13398	2.7789	2.86079	2.79415	3.2128
	FBgn0027932	Akap200	119.523	51.2103	148.476	37.0107
	FBgn0001137	grk	2.29428	0.950841	1.0072	0.499295
	FBgn0027490	D12	1.3646	0.442238	0.961801	1.00366
	FBgn0043002	Chrac-14	9.87885	9.07685	9.53238	3.18604
	FBgn0002887	mus201	2.75161	1.02646	2.88019	2.64973
	FBgn0051897	CG31897	0.633555	0.111216	0.227644	0.336543
	FBgn0027780	U26	2.02873	1.49411	2.24083	1.41922
	FBgn0026718	fu12	31.6745	39.715	32.5603	48.4595
	FBgn0029173	fu2	2.13138	2.49416	2.67401	2.55192
	FBgn0262029	d	2.56663	0.891656	2.13845	0.466476
	FBgn0053194	CheA29a	0.318678	0	0	0
	FBgn0051896	tRNA:CR31896	0	0	197.822	0
	FBgn0051892	tRNA:CR31892	0	0	197.822	0
	FBgn0264340	CG43796	3.21375	0.498088	2.99988	2.87005
	FBgn0263489	unsRNA:d-a	0	0	0	0
	FBgn0032047	CG13088	17.1311	4.23856	10.9286	12.2704
	FBgn0263314	CG43400	0.420955	0.293183	0	0.677911
	FBgn0032048	Dh31	0.723643	0.202074	0.925269	0
	FBgn0032049	Bace	4.88111	11.4714	17.9968	9.5634
	FBgn0032050	CG13096	18.9299	12.7402	14.0193	16.5785
	FBgn0032051	CG13097	3.62642	2.7856	2.20966	5.12708
	FBgn0032052	CG13089	11.8682	8.75368	14.3041	10.6601
	FBgn0032053	mRpL51	22.6989	23.368	23.4521	16.7977
	FBgn0032054	CG13090	9.32	6.45118	7.5871	8.85257
	FBgn0032055	CG13091	0.312834	0	0.111889	0
	FBgn0016122	Acer	19.6157	34.9377	14.9146	30.357
	FBgn0250903	lmg	7.14389	4.56311	6.80729	5.65263
	FBgn0028394	CG17834	14.1759	6.14098	12.4243	4.99787
	FBgn0051604	tRNA:CR31604	0	0	197.822	0
	FBgn0051603	tRNA:CR31603	0	0	197.822	0
	FBgn0011259	Sema-1a	0.552639	0.327202	0.353755	0.278494
	FBgn0051895	tRNA:CR31895	0	0	0	0
	FBgn0264437	CR43855	0	16.9616	0	6.42991
	FBgn0051602	tRNA:CR31602	0	0	197.822	0
	FBgn0001114	Glt	250.083	295.419	263.444	306.391
	FBgn0032057	CG9287	0	0	0	0
	FBgn0051889	tRNA:CR31889	0	0	197.822	0
	FBgn0032058	CG9289	0	0	0	0
	FBgn0051890	tRNA:CR31890	0	0	197.822	0
	FBgn0051888	tRNA:CR31888	0	0	197.822	0
	FBgn0032059	PrBP	15.8971	9.25874	13.5734	11.2367
	FBgn0260861	Trs23	16.5208	12.6973	18.6345	11.0397
	FBgn0004914	Hnf4	12.4746	15.9016	13.1541	15.676
	FBgn0032061	CG9314	38.9578	4.56602	29.226	22.3475
	FBgn0003209	raw	7.77463	5.77626	8.96172	5.24322
	FBgn0032065	CG12438	5.10324	0.776055	8.48529	2.48707
	FBgn0032066	CG9463	0.10942	0.0384141	0.117929	0.261571
	FBgn0032067	CG9465	0	0.0407971	0	0
	FBgn0032068	CG9466	0.111015	0.0779465	0.0598195	0
	FBgn0032069	CG9468	1.72071	0.490833	2.66608	0.599854
	FBgn0261627	CG42710	9.66001	1.07727	7.69062	3.10827
	FBgn0261629	CG42712	0	0	0	0
	FBgn0029123	SoxN	0.455644	0.494576	3.88845	0.395932
	FBgn0052986	CG32986	2.0405	0.428385	1.73675	1.30631
	FBgn0052987	CG32987	0.750176	0	0.399632	0.600037
	FBgn0052988	CG32988	1.24012	0	0.788658	2.38475
	FBgn0052983	CG32983	2.55553	0.357264	1.08276	2.04805
	FBgn0032072	CG9483	11.3026	0.608252	9.47052	7.30819
	FBgn0261630	CG42713	3.99025	1.26482	7.99581	2.91606
	FBgn0085427	CG34398	3.03642	1.61473	3.06504	1.42184
	FBgn0032074	Tsp29Fa	31.1618	28.7415	58.7821	6.16491
	FBgn0032075	Tsp29Fb	61.4369	68.938	60.4603	15.5939
	FBgn0032076	CG9510	167.891	218.153	192.488	307.282
	FBgn0032077	CG9515	3.0872	1.31993	1.30875	2.5642
	FBgn0032078	C1GalTA	7.67124	3.26942	10.0894	1.32234
	FBgn0032079	CG31886	3.37545	1.3893	2.38138	1.64016
	FBgn0032080	CG9525	0	0	0	0.135292
	FBgn0052985	CG32985	0.0899737	0	0	0
	FBgn0052984	CG32984	0.182722	0	0	0.145752
	FBgn0032082	CG18088	0	0.120688	0.277322	0.823128
	FBgn0032083	CG9541	0.50513	0.0459289	0.247836	0.226774
	FBgn0032084	CG13101	5.27799	3.14352	4.38043	1.27747
	FBgn0040963	CG18662	60.2502	11.5947	75.339	42.8465
	FBgn0011705	rost	4.82332	2.25377	8.46117	3.42407
	FBgn0032085	CG9555	0.30127	3.69391	0.644014	0.481441
	FBgn0013746	alien	45.3098	32.36	40.267	35.4983
	FBgn0032086	CG17906	0.24841	0.173667	0.263286	0.398079
	FBgn0040964	CG18661	2.89549	1.9758	4.75867	1.93296
	FBgn0015316	Try29F	1.28323	0.29927	0.682052	0.684784
	FBgn0032087	CG9568	12.952	8.30205	46.7131	9.00152
	FBgn0032088	CG13102	4.13346	10.3655	12.9605	1.99654
	FBgn0032089	Rcd-1r	10.2179	3.69065	9.20763	6.12482
	FBgn0032090	CG9582	2.90487	0.145192	5.95861	3.65329
	FBgn0051708	CG31708	0	0.0702344	0	0
	FBgn0032094	CG12439	3.64174	0.545426	3.02967	2.81469
	FBgn0032095	Toll-4	0.100171	0	0.0540016	0
	FBgn0051609	CG31609	11.4231	0.721737	10.2213	5.86926
	FBgn0032096	Or30a	0	0	0	0
	FBgn0052982	CG32982	3.56635	2.28401	1.74542	1.68218
	FBgn0032100	CG13108	0.191129	0.267583	0	0.305785
	FBgn0032101	CG9586	58.7144	44.6301	60.5559	55.5112
	FBgn0041092	tai	8.3255	5.53941	8.43004	4.45843
	FBgn0032104	aust	6.12673	1.11101	5.5418	2.90729
	FBgn0051885	tRNA:CR31885	0	0	0	0
	FBgn0263985	CR43734	6.85592	0.784076	7.94846	1.86702
	FBgn0032105	borr	10.0522	3.0364	8.17283	3.71093
	FBgn0028433	Ggamma30A	0.633457	7.10455e-05	0.000110427	1.45092e-26
	FBgn0263984	CG43733	5.12242	1.33716	3.67359	1.83379
	FBgn0040097	lectin-30A	0	0	0	0
	FBgn0262033	CG42844	0.499796	0	0.518646	2.41995
	FBgn0032109	CG17005	6.27709	0.6476	4.56151	3.09267
	FBgn0010314	Cks30A	6.50575	2.10301	4.80728	1.33349
	FBgn0026439	Eaat1	20.9367	23.2712	13.882	31.5655
	FBgn0032110	CG3748	2.70958	0.304035	3.13922	3.28685
	FBgn0263082	CG43350	0	0	0	0
	FBgn0032111	CG13110	23.3162	2.27124	19.8951	19.5502
	FBgn0263323	CG43404	0	0	0	0
	FBgn0085210	CG34181	6.8075	0.365984	5.26657	1.67896
	FBgn0085395	Shawl	0.0465978	0	0.100514	0
	FBgn0264447	CR43865	0.302695	0	0.161755	0.241864
	FBgn0012036	Aldh	154.561	405.507	196.568	433.254
	FBgn0032115	CG4438	20.7137	5.45954	17.3943	15.2999
	FBgn0032116	CG3759	1.0267	1.08144	0.221308	0.890751
	FBgn0000640	Fbp2	10213.9	12139.8	24462.2	23503.6
	FBgn0262036	CG42847	23.8205	12.4837	30.0669	32.9883
	FBgn0032117	FucTB	22.7312	10.3672	20.951	16.5868
	FBgn0011232	scat	6.63787	5.69364	7.26082	4.91048
	FBgn0032119	CG3769	0	0	0	0
	FBgn0085211	RpS28-like	4.39744	1.82002	11.5352	4.29568
	FBgn0002973	numb	8.84734	4.49964	6.32853	3.34456
	FBgn0053723	CG33723	3.11893	0.310155	1.39332	0
	FBgn0264269	CR43769	0	0	0	0
	FBgn0004868	Gdi	220.131	205.911	244.124	192.57
	FBgn0032120	CG33298	5.61158	3.98867	4.58525	3.32945
	FBgn0032123	Oatp30B	11.7534	10.1811	9.41049	11.5416
	FBgn0032122	CG31883	0	0	0	0
	FBgn0032124	CG17855	4.44063	3.03617	5.59603	1.06324
	FBgn0032125	Cpr30B	0	0	0	0
	FBgn0032126	CG13113	0	0	0	0
	FBgn0032127	CG13114	0	0	0	0
	FBgn0032129	jp	2.9144	1.22293	1.6532	1.96259
	FBgn0032130	CG3838	5.10726	4.63413	3.98925	4.4332
	FBgn0028479	Mtpalpha	98.228	124.999	78.0381	132.376
	FBgn0051709	CG31709	97.1816	14.0804	75.1559	63.4271
	FBgn0014179	gcm	0.554537	0.111269	0.256779	0.632032
	FBgn0263612	CR43621	2.30462	0.453824	0	0
	FBgn0032131	CG3841	3.3207	6.31486	2.79748	2.00378
	FBgn0032132	CG4382	1.53919	0.143943	0.991193	0
	FBgn0019809	gcm2	0.0718334	0.050416	0	0
	FBgn0040070	Trx-2	112.802	141.301	147.3	123.181
	FBgn0032135	GlcAT-S	10.3422	2.60306	7.38117	6.77403
	FBgn0051882	CG31882	11.0753	1.37658	8.34901	7.88757
	FBgn0032136	CG15828	11.4579	35.5089	4.89197	28.7348
	FBgn0053299	CG33299	0	0	0	0
	FBgn0000273	Pka-C1	11.3248	10.3344	7.43445	8.94792
	FBgn0015393	hoip	29.12	35.8546	26.5611	34.0642
	FBgn0011207	pelo	19.3674	14.1281	15.4071	17.6916
	FBgn0051710	CG31710	11.9833	8.36815	7.58729	7.69258
	FBgn0032138	CG4364	40.1997	46.1641	45.0845	46.3426
	FBgn0028704	Nckx30C	0.0571741	0	0.0412169	0.0539237
	FBgn0032139	CG13116	6.81159	1.226	10.7757	0.311396
	FBgn0032140	CG13117	11.8146	10.0299	8.74627	7.69113
	FBgn0015035	Cyp4e3	168.559	61.5408	12.5028	85.7446
	FBgn0022720	zf30C	10.0126	8.23495	11.3437	8.7541
	FBgn0011291	Taf11	13.6043	10.3908	22.1558	10.4978
	FBgn0025117	und	63.9441	40.2762	71.2635	48.7091
	FBgn0032142	CG13120	0	0	0	0
	FBgn0032143	CG4017	1.45329	0.783931	1.43866	0.178449
	FBgn0032144	CG17633	0	0.0967345	27.3225	0
	FBgn0032145	CG13121	0	0	0	0
	FBgn0065108	ppk16	0.113136	0.0793333	0	0
	FBgn0065109	ppk11	0	0	0	0
	FBgn0032147	IP3K1	3.5896	4.39352	4.24106	3.42053
	FBgn0032149	CG4036	9.81317	6.29784	6.59777	4.80032
	FBgn0042174	CR18854	74.6093	55.1524	79.8209	70.8923
	FBgn0032150	CG13123	2.95337	2.48106	3.56163	1.98336
	FBgn0032151	nAcRalpha-30D	0.124338	0.052411	0	0.11878
	FBgn0264266	CR43766	0	0	0.625277	0
	FBgn0029174	FKBP59	60.5703	47.3448	50.866	57.327
	FBgn0085212	CG34183	11.4579	3.50841	7.15843	4.43311
	FBgn0032153	CG4537	11.452	9.50217	17.0798	9.92171
	FBgn0032154	CG5924	0.723861	1.20613	0.972156	0.866082
	FBgn0063449	Uhg2	10.4687	15.021	15.5133	17.0205
	FBgn0063391	snoRNA:U14:30Eb	0	0	0	0
	FBgn0063392	snoRNA:U14:30Ea	0	0	0	0
	FBgn0063389	snoRNA:Me18S-G1620	0	0	0	0
	FBgn0025881	snoRNA:Me18S-A1576	0	0	0	143.797
	FBgn0010520	Bka	6.61972	5.39597	3.79151	7.96236
	FBgn0004867	RpS2	1108.97	1545.26	1478.81	1287.02
	FBgn0053300	Muc30E	0.40413	0.177362	0.064755	0.150785
	FBgn0032156	CG13124	8.16093	6.73823	5.7569	4.20993
	FBgn0032157	Etl1	5.64219	4.31109	4.82871	4.67231
	FBgn0024285	Srp54	14.5206	10.2468	15.1716	9.68239
	FBgn0040064	yip2	334.792	284.178	334.418	323.678
	FBgn0025700	CG5885	388.534	543.311	365.732	497.889
	FBgn0032160	CG4598	126.392	135.107	108.93	151.449
	FBgn0032161	CG4594	11.8888	8.81032	16.9697	25.0697
	FBgn0032162	CG4592	27.0703	33.664	28.0127	21.0434
	FBgn0032163	TbCMF46	0.101313	0.0710619	0.326249	0
	FBgn0259712	CG42366	0.0631555	0	0	0
	FBgn0259713	CG42367	0	0	0	0
	FBgn0051876	Cpr30F	0	0	0	0
	FBgn0051712	CG31712	18.6569	9.51256	14.3398	13.5836
	FBgn0051713	Apf	28.4566	27.6206	22.4984	20.1418
	FBgn0032166	CG4619	5.15153	4.58213	4.5459	6.01718
	FBgn0032167	CG5853	17.8799	28.7233	15.9767	21.6192
	FBgn0262428	mir-87	0	0	0	0
	FBgn0032168	CG13126	3.31437	3.79628	2.48838	2.29252
	FBgn0032169	CG4709	4.27196	2.99564	4.0989	2.51238
	FBgn0032171	CG5846	7.90578	3.90282	9.87132	5.21431
	FBgn0032170	CG4658	20.6916	12.8145	23.4274	10.595
	FBgn0263766	CR43683	29.7628	21.7089	29.2827	19.5492
	FBgn0032172	CG5850	21.7796	15.8378	18.9138	20.0612
	FBgn0015664	Dref	13.7295	8.93069	9.90306	8.93522
	FBgn0011272	RpL13	921.387	1178.99	1247.78	1155.01
	FBgn0040965	CG13130	0	0	0.2613	0
	FBgn0000180	bib	1.28885	0.543011	1.2783	0.903687
	FBgn0051875	CG31875	2.51169	0.811436	4.73223	4.32778
	FBgn0051755	SoYb	0.826604	0.201944	0.310354	0.801411
	FBgn0043456	CG4747	28.052	31.9107	22.8671	21.544
	FBgn0011584	Trp1	76.0075	99.8229	72.7554	91.4433
	FBgn0032175	CG13131	2.63989	0.400263	1.37898	1.24093
	FBgn0032176	CG13127	1.75055	0.236304	1.23223	0.85871
	FBgn0027600	obst-B	10.3209	5.36322	7.10728	6.38738
	FBgn0053301	CG33301	15.8416	30.6735	5.56145	17.2126
	FBgn0053302	Cpr31A	0.613516	0.214913	0.983385	0
	FBgn0011823	Pen	75.4627	13.2662	50.3623	42.0606
	FBgn0032178	Spn31A	0.403635	0	0	0
	FBgn0032180	CG31714	0.0342187	0	0	0
	FBgn0032181	CG13133	0	0	0	0
	FBgn0083945	CG34109	0.608262	0.0948803	1.01862	0.754234
	FBgn0262032	CG42843	0.30394	0	0	0
	FBgn0032184	CG13135	0	0	0	0
	FBgn0032187	CG4839	1.62541	1.74371	1.44278	0.688593
	FBgn0032188	CG13137	3.18621	0.465263	1.70539	1.48432
	FBgn0028675	Sur	0.0907901	0.17543	0.0735924	0.0361396
	FBgn0051874	CG31874	8.56009	0.623667	8.10752	3.72654
	FBgn0032189	Ripalpha	5.34237	2.70346	3.80746	4.03125
	FBgn0005593	RpL7	1137.24	1545.65	1509.4	1490.13
	FBgn0085188	CG34159	40.6825	28.1683	57.4467	27.475
	FBgn0032191	CG5734	11.3984	9.60975	12.5991	12.2449
	FBgn0032192	CG5731	0.611364	0.571746	0.546839	0.487813
	FBgn0032193	CG5727	17.3945	9.39374	15.0646	13.0984
	FBgn0032194	CG4901	7.26086	5.15026	6.80188	7.59494
	FBgn0024320	Npc1a	18.1901	11.6266	16.8034	14.2424
	FBgn0250843	Pros35	121.36	99.0693	134.945	103.47
	FBgn0032195	CG4908	2.30438	3.37385	1.61626	3.73546
	FBgn0032196	CG5708	23.9212	11.0222	19.0956	14.5912
	FBgn0032197	CG5694	8.74654	7.18662	6.24841	7.60107
	FBgn0032198	eEF1delta	272.194	331.893	208.404	327.395
	FBgn0051720	CG31720	0.966968	0.594001	0.585374	0.0962397
	FBgn0004419	me31B	73.0705	50.6548	58.5771	45.3333
	FBgn0024248	chico	8.31589	7.69411	7.03497	8.82902
	FBgn0000229	bsk	19.7046	17.0077	18.6565	20.7506
	FBgn0051717	CG31717	46.9403	25.7787	50.6119	24.5206
	FBgn0010407	Ror	0.68987	0.322764	0.16491	0.24447
	FBgn0032200	CG5676	58.5213	33.4383	65.6529	41.6616
	FBgn0026379	Pten	7.81811	4.72149	5.30269	5.87829
	FBgn0011305	Rsf1	23.3058	16.3336	23.0406	12.5615
	FBgn0032202	CG18619	48.3455	33.539	61.4442	19.0293
	FBgn0259482	Mob3	16.481	12.2981	15.6431	10.5557
	FBgn0032204	CG4953	6.75945	4.38184	6.04576	3.75911
	FBgn0032205	CG4957	8.50684	7.76655	4.01138	10.5992
	FBgn0260750	Mulk	10.1776	8.23689	5.97906	9.61905
	FBgn0003751	trk	0.229192	0.160299	0	0.36708
	FBgn0260749	Utx	8.83699	4.88613	8.08045	6.59262
	FBgn0054043	CG34043	5.98179	6.76976	2.29457	5.63787
	FBgn0032208	CG5604	18.6895	12.8528	13.797	17.9157
	FBgn0032209	Hand	6.56679	3.26345	1.95192	5.29476
	FBgn0032210	CYLD	16.7722	6.60826	12.7397	12.6297
	FBgn0032211	CG13138	0.109123	0	0	0
	FBgn0005322	nmd	23.8382	18.3146	22.73	23.1732
	FBgn0032213	CG5390	185.071	207.549	219.035	245.472
	FBgn0032214	CG4968	70.6125	21.9179	57.7469	36.0703
	FBgn0027491	Cdk5alpha	1.14831	0.201107	0.513137	0.457412
	FBgn0032215	CG5385	26.5917	15.4796	16.5099	20.093
	FBgn0032216	CG5384	59.8567	44.0983	60.663	57.7484
	FBgn0032217	CG4972	26.4091	16.636	18.5936	20.3214
	FBgn0032218	CG5381	7.99382	13.7887	7.94128	12.0792
	FBgn0032219	CG4995	31.0469	22.2315	26.1637	25.1162
	FBgn0011703	RnrL	5.41488	5.30258	3.52665	4.47614
	FBgn0032221	CG5375	1.27706	0.298688	0.732121	0.407397
	FBgn0032222	CG5037	13.6518	14.3559	8.24315	11.2961
	FBgn0032223	GATAd	6.99185	3.27232	4.27485	3.71386
	FBgn0019932	SamDC	30.7643	32.0063	31.5579	38.5961
	FBgn0051715	CG31715	72.3292	49.2771	83.6623	57.2458
	FBgn0032224	Sps2	56.2103	54.038	43.7714	53.3777
	FBgn0032225	CG5022	0.672863	0.295083	0.0904165	0
	FBgn0085396	CG34367	1.93165	0.122964	5.53221	2.2262
	FBgn0032228	CG5367	0.655094	0	0.140275	0
	FBgn0032229	CG5045	68.9185	43.2669	79.61	50.9397
	FBgn0027568	Cand1	20.6231	12.2872	18.4342	16.0453
	FBgn0003087	pim	7.05771	2.3971	2.95552	5.13582
	FBgn0032230	lft	7.29148	3.26989	8.26436	1.86407
	FBgn0032231	CG5056	12.8457	9.10511	22.0342	9.30887
	FBgn0041723	rho-5	0.291637	0.100889	0.191846	0.0583431
	FBgn0053303	CG33303	96.5565	106.327	84.3027	95.8752
	FBgn0032233	dpr19	0.585478	0	0.260501	0.116315
	FBgn0032234	gny	8.48793	5.86712	6.53894	7.25744
	FBgn0032235	CG5096	8.78479	13.9417	13.5763	1.74295
	FBgn0004106	cdc2	16.5676	6.36169	12.1572	9.68685
	FBgn0032236	mRpS7	34.1107	32.3361	26.3082	30.9473
	FBgn0000413	da	12.3307	7.2336	11.3403	7.42387
	FBgn0262782	Mdh1	719.476	871.558	951.156	864.807
	FBgn0051716	Cnot4	28.0349	16.6009	21.9506	16.6556
	FBgn0032240	CG17768	27.7371	20.903	27.4085	25.3297
	FBgn0067622	LSm-4	8.35213	5.47869	9.13825	6.63467
	FBgn0051718	Ir31a	0	0	0	0
	FBgn0025366	Ip259	105.748	116.001	139.621	159.866
	FBgn0003942	RpS27A	2788.48	3427.02	4009.99	3383.48
	FBgn0032242	CG5355	47.4154	42.6359	37.9975	43.2013
	FBgn0032243	Klp31E	2.12331	2.14761	1.55518	2.08735
	FBgn0032244	RfC3	3.19949	2.35873	3.41448	2.96161
	FBgn0005683	pie	4.30932	1.17237	3.49688	0.803653
	FBgn0032246	CG5168	44.468	32.8205	50.5528	33.184
	FBgn0262601	SmB	21.3482	20.016	18.0104	12.5662
	FBgn0022268	KdelR	177.647	169.981	170.449	162.64
	FBgn0032247	CG5188	9.0517	6.72513	6.10279	7.97825
	FBgn0032248	CG5343	32.248	9.88092	30.9279	24.6302
	FBgn0004915	TfIIB	31.9687	15.0914	33.3904	19.5895
	FBgn0032249	CG5337	0.648857	0.704022	0.31775	0.282053
	FBgn0032250	holn1	21.7717	7.62581	15.6725	13.1127
	FBgn0027052	CHIP	27.0771	18.973	24.8826	20.1124
	FBgn0032251	CG13142	10.7837	3.18072	6.85701	8.1776
	FBgn0032252	CG6232	1.9037	0.581579	1.09693	0.585097
	FBgn0065110	ppk10	1.00455	0.176054	0.941517	1.0026
	FBgn0032253	CG5322	11.1873	5.45766	17.056	4.99209
	FBgn0027611	CG6206	139.446	104.354	200.517	124.992
	FBgn0051719	RluA-1	0.331715	0.0776117	0.178702	0.528668
	FBgn0032256	RluA-2	1.35113	1.0977	1.66076	1.42742
	FBgn0026431	Grip75	4.5544	1.25554	3.23564	1.55652
	FBgn0032258	CG7456	11.4681	11.3068	12.0024	13.6597
	FBgn0032259	CG6144	5.42312	3.14503	5.42378	2.08441
	FBgn0032260	CG13144	1.54507	1.0833	1.14643	1.13854
	FBgn0086347	Myo31DF	9.16845	10.0509	8.41607	4.57292
	FBgn0032261	CG6094	9.51213	9.46291	10.6564	15.2607
	FBgn0032262	CG7384	10.0511	9.53066	8.99615	12.847
	FBgn0021953	Fatp	12.3947	10.9946	10.1171	9.77113
	FBgn0010398	Lrr47	4.44055	1.5968	4.15089	2.72643
	FBgn0032264	Lip4	54.0754	44.07	54.5707	48.4568
	FBgn0032265	CG18301	0	0	0.144246	0
	FBgn0032266	CG18302	0	0	0	0
	FBgn0051721	Trim9	0.164251	0	0.177021	0.174478
	FBgn0032268	CG6138	18.105	1.03638	17.8569	10.0021
	FBgn0032269	w-cup	38.6802	3.12285	22.3882	25.0925
	FBgn0250826	CG34160	36.0708	5.60681	34.5116	13.0907
	FBgn0085190	CG34161	12.3615	0.659543	16.7794	10.7153
	FBgn0032271	CG7329	1.49079	0.160821	2.58104	1.64763
	FBgn0051872	CG31872	0.0505762	0	0	0.0805927
	FBgn0043825	CG18284	0	0.0888616	0	0
	FBgn0032275	CG17097	0	0	0	0
	FBgn0032276	CG17098	17.4011	1.89865	12.5877	9.55963
	FBgn0051871	CG31871	0	0	0.080277	0
	FBgn0040496	CG17104	3.81846	0.98676	3.23609	3.04667
	FBgn0032280	CG17105	77.2771	40.3357	40.0604	122.351
	FBgn0032281	CG17107	24.1307	15.7212	10.1432	16.1219
	FBgn0032282	CG7299	67.643	31.1679	41.5579	138.51
	FBgn0032283	CG7296	79.9849	48.7466	55.8582	40.4075
	FBgn0032284	CG7294	30.4457	14.2316	13.7262	4.39489
	FBgn0032285	CG17108	10.8826	3.08716	7.84285	5.48009
	FBgn0032286	CG7300	0.0650732	0.341362	0.0700705	0.103736
	FBgn0023496	Lip1	0.566881	0.397508	0.607855	1.4479
	FBgn0024740	Lip2	8.27452	5.6158	9.84314	7.1323
	FBgn0032287	CG6415	234.679	259.42	207.919	288.448
	FBgn0032289	CG6431	0.170913	0	0	0
	FBgn0032290	CG6443	14.0357	6.59188	10.2206	10.4528
	FBgn0032291	CG17118	16.5006	2.39408	16.1677	8.69489
	FBgn0032292	CG6750	41.7236	30.515	36.1198	37.5895
	FBgn0032293	Dpy-30L1	24.7407	16.932	18.7043	13.741
	FBgn0027868	Nup107	4.85531	4.3823	3.87085	3.92007
	FBgn0032294	Vha16-5	7.26333	1.77991	8.32328	4.93737
	FBgn0032295	CG12299	2.86579	1.00617	1.59996	0.897028
	FBgn0032296	CG6729	3.5372	2.76387	4.05737	2.90969
	FBgn0263528	mir-4970	0	0	0	0
	FBgn0032297	CG17124	26.4434	35.7771	21.8096	49.9301
	FBgn0027550	CG6495	0.0667388	0.0468473	0.071853	0
	FBgn0015320	UbcD2	44.0819	18.7954	40.7816	25.5453
	FBgn0032298	CG6724	7.57833	5.97766	5.0766	6.99495
	FBgn0032299	CG17127	0	0	0	0
	FBgn0051869	CG31869	0.695313	0.244129	0.337112	0.0791327
	FBgn0051870	CG31870	43.2861	4.87595	26.7817	26.0305
	FBgn0011676	Nos	0.109743	0.100388	0.0410903	5.34641e-250
	FBgn0032305	CG6700	11.1292	8.13695	11.1189	8.40961
	FBgn0263560	mir-4987	0	0	0	0
	FBgn0032303	CG6508	0	0	0	0
	FBgn0032304	CG17134	36.5585	39.622	51.2242	15.219
	FBgn0260453	CG17140	5.1894	1.05287	5.45604	3.62345
	FBgn0260454	CG17139	3.6849	0.601704	2.29974	2.27025
	FBgn0069354	Porin2	41.0105	4.51001	38.8796	26.012
	FBgn0004363	porin	279.398	462.115	264.888	338.595
	FBgn0027453	Dnz1	6.7071	4.38759	6.91395	5.20535
	FBgn0262599	CG43129	0	0.147724	0	0.149256
	FBgn0024227	ial	5.44458	1.57041	4.78847	2.04777
	FBgn0027363	Stam	35.6494	20.0223	37.9522	19.6728
	FBgn0264351	CR43807	0.926054	0	1.4744	0.741646
	FBgn0032311	CG12517	0	0	0	0
	FBgn0032312	CG14071	6.94704	0.736932	13.7405	2.88054
	FBgn0032313	CG14070	13.1187	1.91353	8.93392	9.61723
	FBgn0032314	CG7309	15.5773	2.39464	11.6621	12.5638
	FBgn0032315	CG14069	5.13111	0.877861	5.06516	4.19695
	FBgn0261871	dpr2	0	0	0	0
	FBgn0032318	CG14072	3.36012	1.97162	2.9208	5.35835
	FBgn0053129	CG33129	232.151	304.164	186.628	312.156
	FBgn0032321	YL-1	12.5976	7.44372	12.4901	9.45967
	FBgn0032322	CG16743	218.954	195.656	157.108	181.687
	FBgn0000018	abo	5.43306	4.86942	6.26423	4.33494
	FBgn0010612	l(2)06225	254.686	419.944	233.605	317.916
	FBgn0041781	SCAR	15.4432	11.3323	14.7916	9.95257
	FBgn0004872	piwi	1.3308	1.05119	1.37443	1.50231
	FBgn0026148	CG12253	3.06171	1.60877	2.29023	0.978615
	FBgn0026147	CG16833	16.4682	4.5726	11.5949	13.1166
	FBgn0000146	aub	5.78651	1.81964	3.50727	2.97857
	FBgn0040096	lectin-33A	0.372027	0	1.95093	0
	FBgn0015756	RpL9	1333.35	1744.03	1978.73	1745.39
	FBgn0021761	Nup154	5.74309	4.55895	3.37471	4.90392
	FBgn0032329	Art8	6.39898	3.71746	5.00211	5.48787
	FBgn0250837	dUTPase	38.0175	18.615	25.7279	14.7301
	FBgn0032330	Samuel	6.1271	3.77843	8.31097	2.89945
	FBgn0023415	Acp32CD	0.235259	0	0	0
	FBgn0032331	CG14913	0.220349	0	0	0
	FBgn0040967	CG18666	11.5854	2.0104	9.55642	2.81073
	FBgn0032335	CG14915	0.496696	0.345371	0	0
	FBgn0263971	CG43725	0.600962	0	0	0
	FBgn0032336	Ast-C	0.157146	0.109926	0.83934	0
	FBgn0032337	Ast-CC	0	0	0.521807	0
	FBgn0032338	CG16854	4.50524	0.51835	2.70187	4.00409
	FBgn0032339	CG4705	9.39143	5.62567	9.6656	7.60994
	FBgn0032340	Ge-1	8.0006	7.30478	6.45651	6.08327
	FBgn0032341	Reps	11.0058	7.79981	7.89836	6.54342
	FBgn0261983	l(2)gd1	9.13212	7.84101	11.577	8.79151
	FBgn0032343	CG6201	6.24542	3.69662	7.36666	3.9596
	FBgn0041246	Gr32a	0	0	0.142466	0.212576
	FBgn0027582	CG6230	25.2893	15.3185	16.304	21.4359
	FBgn0032345	CG14921	10.1744	1.36304	5.7517	7.62493
	FBgn0032346	Csl4	4.12395	3.4897	2.56652	4.94566
	FBgn0028700	RfC38	5.69995	4.6544	6.27327	5.20789
	FBgn0262647	Nup160	5.68198	2.73477	4.96044	3.74298
	FBgn0032348	CG4751	2.8962	2.10627	2.72235	1.79089
	FBgn0040211	hgo	0	0	0.543495	0.202594
	FBgn0010197	Gyc32E	0.0974402	0	0.0525274	0.155262
	FBgn0051867	CG31867	2.68662	0.170766	1.8127	1.17404
	FBgn0032350	CG6287	196.011	124.96	289.462	178.578
	FBgn0259822	Ca-beta	0.0866179	0.154352	0.187344	0.14011
	FBgn0014076	Vm32E	0	0	0.648665	0
	FBgn0032354	CG4788	3.58151	1.67356	1.70399	2.11869
	FBgn0264441	CR43859	0.419851	0.292421	0	0
	FBgn0264442	ab	3.61734	0.67848	2.40759	1.65805
	FBgn0086035	snoRNA:Me18S-G642	0	0	0	0
	FBgn0040232	cmet	3.2024	0.683613	2.34969	2.03743
	FBgn0052831	CG33695	6.06423	3.09588	4.66972	3.49258
	FBgn0032358	Ppt2	27.3556	22.6363	48.5208	26.3385
	FBgn0020270	mre11	4.0321	1.41446	1.97813	0.698967
	FBgn0032359	Osi21	0	0	0	0
	FBgn0263328	CR43409	0	0	0	0
	FBgn0263874	CR43721	1.50977	0	5.90841	2.47255
	FBgn0032360	CG14926	64.5752	9.09988	55.9663	39.1979
	FBgn0000287	salr	2.01358	0.512996	1.53528	0.904434
	FBgn0263764	CG43681	1.74644	0.730947	1.8352	1.12271
	FBgn0261648	salm	0.891285	0.493364	1.02127	0.473101
	FBgn0263087	CG43355	72.6393	40.8701	134.706	49.0122
	FBgn0003313	sala	0.0475981	0.122151	1.61948	2.88802e-07
	FBgn0032361	CG6488	4.09969	4.195	5.14114	4.35953
	FBgn0032362	spz4	0.116982	0.0410653	0	0
	FBgn0032363	CG6509	4.19551	2.7567	3.60296	1.9138
	FBgn0032364	CG4970	7.48643	1.43785	5.67854	4.64998
	FBgn0032365	CG14929	6.55298	0.268674	4.44345	1.86042
	FBgn0032366	CG14930	10.5556	1.96849	9.70751	8.64224
	FBgn0262683	CG43153	4.9901	7.58533	1.8595	14.601
	FBgn0028490	CG31705	129.101	94.7677	164.021	126.434
	FBgn0051706	CG31706	0.336081	0.11769	0	0
	FBgn0085191	CG34162	0	0.0787775	0	0.358659
	FBgn0261707	CR42743	2.18051	0.105374	1.53451	1.81565
	FBgn0263386	CG43438	0	0	1.10581	0
	FBgn0028412	Mst33A	41.1952	4.63792	26.8986	21.9437
	FBgn0032367	CG6555	0	0	0	0
	FBgn0015400	kek2	0	0.02349	0.108318	0.0532588
	FBgn0032368	spag4	3.19595	0.372976	2.46134	0.851862
	FBgn0032369	CG6614	3.06951	0.179616	1.98553	2.20109
	FBgn0032370	CG12307	27.0927	3.60187	20.3816	16.0567
	FBgn0032371	CG4983	25.6852	4.30445	16.8759	14.4954
	FBgn0262786	CG43167	8.708	1.91368	9.06735	8.12738
	FBgn0032372	CG4988	17.3996	2.60279	18.3876	9.99349
	FBgn0032373	Vha100-5	5.67711	8.3969	8.29445	2.15495
	FBgn0259960	CG42470	0	0	0	0
	FBgn0259961	CG42471	0	0	0	0
	FBgn0259962	Sfp33A1	0	0	0	0
	FBgn0032374	CG14931	14.0888	0.63576	6.51465	5.82289
	FBgn0032375	CG14932	11.2033	2.96508	7.73378	8.14075
	FBgn0032376	Tsp33B	10.0092	0.845961	9.02101	4.96711
	FBgn0032377	CG14937	0.681222	0	0.486968	0.36249
	FBgn0020309	crol	12.9372	8.8114	9.04082	8.53296
	FBgn0086036	snoRNA:Me18S-A934	0	0	0	0
	FBgn0032378	CycY	23.8915	21.4108	23.2944	14.6389
	FBgn0259225	Pde1c	5.99863	4.20433	3.988	2.0656
	FBgn0000588	esc	1.47344	1.47627	0.790528	1.00782
	FBgn0261056	Sfp33A4	0	0	0	0
	FBgn0259963	Sfp33A2	0	0	0	0
	FBgn0264565	CR43937	0	0	0	0
	FBgn0259964	Sfp33A3	0	0.472812	0	0
	FBgn0264564	CG43936	0	0	0	0
	FBgn0051704	CG31704	6.22604	5.19003	0	0
	FBgn0040968	CG14933	0.000793698	6.7232	16.5053	13.5108
	FBgn0259989	CG42486	47.6221	69.0266	21.0389	46.5601
	FBgn0032381	Mal-B1	0.196286	0	0	0
	FBgn0032382	Mal-B2	33.1084	31.6108	33.9722	46.8487
	FBgn0261805	CG42751	1.34251	2.7902	2.06164	1.08818
	FBgn0026392	Or33a	0.167864	0	0	0
	FBgn0026391	Or33b	0	0	0	0
	FBgn0026390	Or33c	0	0	0.175878	0
	FBgn0005664	Cry	0	0	0	0
	FBgn0032385	CG16964	13.459	1.07214	6.44619	4.33044
	FBgn0263019	CR43314	0	0.0347249	0.0540717	0
	FBgn0263107	bft	0	0	0	0
	FBgn0032387	CG16965	0.153011	0.0536913	0.246895	0
	FBgn0032388	CG6686	13.301	9.40333	11.5106	11.2032
	FBgn0085192	CG34163	11.9659	13.2236	11.8104	7.0311
	FBgn0261266	zuc	0.678578	0.118809	0.905121	0.542491
	FBgn0032390	dgt2	5.85278	3.23963	5.42997	4.29821
	FBgn0032391	escl	2.90413	1.10487	2.43105	1.80648
	FBgn0051866	Ada1-2	6.3623	4.6622	6.43734	2.69756
	FBgn0042127	CG18789	10.0789	4.06123	7.20048	6.16987
	FBgn0051864	Qtzl	12.8936	10.8812	11.997	9.32058
	FBgn0051865	Ada1-1	4.73281	3.39642	4.7025	1.83343
	FBgn0042125	CG18787	13.1315	4.52428	9.33155	9.56594
	FBgn0032393	CG12264	28.2237	25.2763	26.5006	23.4458
	FBgn0032394	CG6746	30.5424	41.5909	27.3851	30.387
	FBgn0014019	Rh5	0.949804	0.190197	1.16171	0.866958
	FBgn0032395	CG6734	1.48122	1.36368	1.32452	1.70798
	FBgn0010497	dmGlut	5.92493	2.95609	9.37251	1.82109
	FBgn0042126	CG18788	1.86931	0.345061	1.37323	1.25591
	FBgn0032397	Tom70	21.603	7.94554	18.3017	14.5733
	FBgn0032398	CG6766	38.285	37.1022	37.2015	38.68
	FBgn0032399	CG6785	0.799652	0.384269	1.36228	0.469343
	FBgn0032400	CG6770	2753.88	1880.72	5067.08	1771.01
	FBgn0032401	CG6792	1.22719	0.799523	1.60144	0.55931
	FBgn0032402	CG14945	6.13641	2.52178	5.36962	0.699137
	FBgn0028425	JhI-21	4.95454	5.06745	4.33321	4.01824
	FBgn0032404	RpL7-like	26.1815	24.6685	26.7537	26.3971
	FBgn0085193	CG34164	0.237001	0	0.251439	0.379673
	FBgn0027505	rab3-GAP	19.345	6.80742	16.9611	10.2103
	FBgn0032405	CG14946	2.12703	0.989995	3.17178	0.902298
	FBgn0032406	CG14947	0	0	0	0
	FBgn0003145	prd	0.820741	0.209453	0.384632	0.237957
	FBgn0032407	Pex19	39.0075	44.6529	30.2085	37.2043
	FBgn0032408	CG6712	5.28151	4.96764	4.90721	2.6644
	FBgn0028707	Mt2	1.17571	0.941347	0.734034	0.825119
	FBgn0032409	Ced-12	5.00541	2.95138	3.73636	2.76631
	FBgn0029137	Patsas	0.0701021	0	0.075452	0
	FBgn0027081	Aats-thr	38.7208	44.3948	34.0312	45.1432
	FBgn0015797	Rab6	58.9019	47.4926	61.9005	43.3135
	FBgn0263234	Phae1	59.4918	52.956	64.3851	9.57339
	FBgn0263235	Phae2	16.6357	18.4893	13.3077	9.12436
	FBgn0032414	CG17211	0.964657	0.519542	0.83337	0.0512122
	FBgn0032415	rho-6	1.11715	0.937737	1.18658	0.715585
	FBgn0032416	Gr33a	0.66196	0	0.236665	0.528311
	FBgn0051760	CG31760	0.805183	0.0807655	0.331029	0.549646
	FBgn0051861	CG31861	28.4017	3.64366	14.0798	12.0894
	FBgn0051860	CG31860	3.46096	0.324732	2.31646	3.43413
	FBgn0032419	CG17217	4.70509	0.252397	7.97828	1.74564
	FBgn0032420	CG6583	8.29633	6.06143	10.7674	6.92301
	FBgn0032421	crok	14.8858	5.54014	18.669	5.72735
	FBgn0263088	CR43356	10.6959	2.12436	8.45005	6.57801
	FBgn0000114	aret	26.0974	8.48891	22.4088	18.1059
	FBgn0032422	atilla	5.8906	6.92644	8.49872	4.97704
	FBgn0051759	CG31759	2.02104	1.50946	1.19944	2.35528
	FBgn0051862	CG31862	0	0	0	0
	FBgn0264361	CG43813	0	0	0	0
	FBgn0262475	bru-2	4.28897	4.5911	4.98382	3.17423
	FBgn0032424	CG17010	9.37195	1.00365	8.36231	4.78145
	FBgn0041195	Pkd2	9.43149	2.36523	6.25688	10.2399
	FBgn0043841	vir-1	280.45	228.382	481.639	380.623
	FBgn0032428	CG6405	5.88346	1.07987	5.24514	4.25201
	FBgn0032429	CG5446	102.18	81.0191	108.469	56.5156
	FBgn0032430	CG6388	5.29648	6.46731	4.84436	6.72975
	FBgn0032431	CG5435	11.5699	0.622562	6.85402	2.85032
	FBgn0040286	SC35	32.5902	24.5296	35.5456	26.0649
	FBgn0020443	Elf	45.6655	50.4306	40.4585	54.438
	FBgn0263468	snoRNA:SC35-a	0	0	0	0
	FBgn0263469	snoRNA:SC35-b	0	0	0	0
	FBgn0032433	Oatp33Ea	2.15084	2.1019	5.69325	0.555257
	FBgn0032434	CG5421	3.70713	0.519614	4.76693	3.01725
	FBgn0032435	Oatp33Eb	1.18776	2.80868	1.88521	1.09614
	FBgn0032436	CG5418	0	0.112061	0.170848	0
	FBgn0032437	CR17024	0	0	0	0
	FBgn0259176	bun	40.2881	42.955	36.0077	46.6108
	FBgn0262203	mir-967	0	0	0	0
	FBgn0051858	t-cup	5.69206	0.209204	6.63888	6.73101
	FBgn0261812	CG42754	0	0	0	0
	FBgn0262353	CG43051	72.4299	77.4369	152.043	107.7
	FBgn0263458	snoRNA:CG43051-a	253.579	46.8485	162.542	133.25
	FBgn0261709	CR42746	0.248796	0	0	0
	FBgn0085424	nub	1.31982	0.653483	1.31474	0.125072
	FBgn0032439	Ref2	12.5763	2.15164	6.34146	7.41054
	FBgn0004394	pdm2	0.510803	0.163054	0.702085	0.128141
	FBgn0032442	CG15485	0.0699183	0.0490756	0.0752553	0
	FBgn0032444	CG5525	46.5629	36.2886	36.4504	38.6873
	FBgn0032445	CG6153	23.3131	11.4227	25.8021	22.772
	FBgn0032446	CG5780	3.00967	1.94298	4.66892	1.48329
	FBgn0032447	PICK1	6.00963	0.840611	5.1859	4.0005
	FBgn0032448	CG5781	10.3066	0.94035	7.61501	3.22921
	FBgn0032449	CG17036	4.88055	3.19453	4.88652	2.94287
	FBgn0032450	CG5776	0.938376	0.862201	0.69345	0.652813
	FBgn0032451	spict	18.5404	13.1731	21.8729	12.0028
	FBgn0032452	CG15484	1.75556	0.614064	0.699494	0.351372
	FBgn0032453	CG6180	95.8702	99.7933	134.924	83.8859
	FBgn0032454	CG5787	13.257	5.66124	9.3217	9.05613
	FBgn0032455	CG5792	22.9503	14.3966	16.4431	22.1255
	FBgn0032456	MRP	13.5843	12.6061	10.9683	11.7474
	FBgn0032457	CG15483	5.60844	0.374379	5.00278	2.34618
	FBgn0264366	CR43818	0.695541	0	0.730984	0
	FBgn0015399	kek1	2.99734	0.68187	2.40521	1.9093
	FBgn0040508	ACXC	8.42975	1.18394	7.46712	6.42658
	FBgn0040509	ACXB	0.853693	0.099918	0.613772	0.831251
	FBgn0040510	ACXA	4.26474	0.465923	3.68861	3.32764
	FBgn0040506	ACXE	1.96045	0.275336	1.00412	1.09334
	FBgn0032462	CG16800	0	0	0	0
	FBgn0263598	Vha68-2	129.434	153.816	93.4284	86.4239
	FBgn0032464	Vha68-3	10.1525	1.23715	9.63696	8.65563
	FBgn0032465	CG12404	43.7284	40.4461	40.2342	36.0641
	FBgn0020368	Vha68-1	8.69277	2.23138	5.23904	6.82532
	FBgn0021796	Tor	4.92846	3.68291	4.49695	3.97441
	FBgn0032467	CG9934	21.9066	11.7348	24.5757	15.6456
	FBgn0028965	A16	26.096	11.9074	26.1823	14.5463
	FBgn0262160	CG9932	12.2478	7.05681	10.3145	5.64863
	FBgn0032470	CG5142	0.344584	0	0.0925912	0
	FBgn0262352	CG43050	0.684384	0	2.00805	1.36789
	FBgn0032471	CG5122	4.08243	0.472947	2.76998	2.95015
	FBgn0032472	CG9928	9.93617	46.1811	5.79612	25.3345
	FBgn0040972	CG16978	0	0	0	0
	FBgn0028410	Pk34A	7.71994	2.60472	6.26904	5.4818
	FBgn0032473	CG5204	5.28351	0.772544	3.07943	3.15926
	FBgn0032474	DnaJ-H	34.1683	12.2205	33.6316	16.8463
	FBgn0024291	Sir2	5.49658	4.8794	3.93721	4.0633
	FBgn0032475	Sfmbt	4.91802	3.8136	5.13053	3.39422
	FBgn0264546	CG43925	0	0	0	0
	FBgn0032476	CG5439	5.6404	4.09301	6.6831	5.27579
	FBgn0032477	CG5287	12.7	13.8067	12.3653	13.2069
	FBgn0032478	CG5458	1.48399	0.207958	2.37966	1.18566
	FBgn0032479	CG16974	17.2371	13.7465	16.5892	15.5575
	FBgn0051849	CG31849	0.158782	0.111426	0.256143	0.633064
	FBgn0032480	Edem2	16.7371	15.0099	15.7971	13.5883
	FBgn0032481	CG16972	12.718	1.91326	8.43134	8.76294
	FBgn0032482	Pect	111.846	69.9278	111.366	98.2584
	FBgn0032483	CG15482	5.40708	0.783182	5.3641	3.57913
	FBgn0004191	snRNA:U2:34ABa	8.44144	6.95633	15.709	5.54915
	FBgn0032484	kek4	0.0691625	0.048546	0.0744468	0
	FBgn0004192	snRNA:U2:34ABb	8.44144	8.69542	8.56856	3.41486
	FBgn0032485	CG9426	9.46018	6.97844	7.90567	8.30016
	FBgn0032486	CG5705	2.47114	2.4615	2.50668	2.28491
	FBgn0032487	Ski6	9.32107	7.12768	10.3668	8.32944
	FBgn0032488	CG16812	9.08013	5.22383	7.3369	6.67531
	FBgn0032489	CG15480	0	0	0	0
	FBgn0032490	CG16813	0	0	0	0
	FBgn0032491	CG16815	0	0	0	0
	FBgn0032492	Prosalpha6T	16.8194	2.00687	13.7751	9.78512
	FBgn0032493	CG15479	0.244612	0	0	0
	FBgn0027586	CG5867	4.46442	10.288	1.38751	3.2732
	FBgn0032494	CG5945	1.07946	0.151042	0.458917	0.345646
	FBgn0041720	snRNA:U2:34ABc	8.44144	8.69542	8.56856	3.41486
	FBgn0003935	snRNA:U5:34A	21.0482	9.55424	38.2977	0
	FBgn0032495	CG16820	6.65124	3.21644	3.5656	2.56298
	FBgn0051728	CG31728	11.5093	4.96499	10.6352	1.53747
	FBgn0051851	CG31851	2.36651	0.496467	4.51935	1.51643
	FBgn0051730	CG31730	6.9021	0.565725	6.36911	3.92136
	FBgn0032497	CG6043	2.42073	1.69528	2.39694	1.14981
	FBgn0028406	Drep-4	5.31031	2.44533	4.19268	3.97019
	FBgn0051848	CG31848	10.6313	2.47724	8.84983	10.1423
	FBgn0032498	CG6108	0.236529	0.138444	0.0850869	0.188394
	FBgn0032499	Uvrag	8.24603	3.76223	9.02434	3.5058
	FBgn0051729	CG31729	24.8015	20.2255	22.7725	19.8182
	FBgn0040973	CG16824	12.8886	1.98236	10.2286	8.13375
	FBgn0264308	CG43778	0.0532797	0.0187166	0	0.10551
	FBgn0264301	CG43779	3.43507	0.343095	3.12148	0.786321
	FBgn0032503	CG16825	2.90861	0.263439	3.82699	2.5455
	FBgn0032505	CG16826	0.324821	0.227522	0.867067	0.259626
	FBgn0032506	CG9395	0.0945658	0.0332015	0	0
	FBgn0032507	CG9377	0	0	0	0.263933
	FBgn0022069	Nnp-1	7.86557	4.89937	6.24394	6.97535
	FBgn0032509	CG6523	57.2785	55.0339	58.2821	56.2121
	FBgn0051852	Tap42	11.8036	10.024	15.1547	9.5391
	FBgn0051855	CG31855	15.2426	7.16649	11.2843	9.0504
	FBgn0032511	CG9306	54.1098	80.0994	45.9498	54.5801
	FBgn0032512	CG9305	9.75903	4.16213	6.38032	6.105
	FBgn0032513	CG6565	10.9919	7.64789	7.80792	11.8836
	FBgn0032514	CG9302	12.6949	12.6439	8.4902	10.6212
	FBgn0025724	beta'Cop	41.4477	49.9551	31.9483	43.8899
	FBgn0032515	loqs	13.5435	4.95506	16.4113	8.46503
	FBgn0032516	CG9293	19.8117	10.442	29.7298	15.1392
	FBgn0032517	CG7099	1.77224	0.97274	1.25642	1.05833
	FBgn0032518	RpL24	774.702	903.029	1125.31	857.271
	FBgn0032519	CG16957	17.4701	2.0937	12.6956	8.79903
	FBgn0032520	CG10859	25.3587	3.0491	22.1751	18.268
	FBgn0032521	CG7110	1.02547	0.757927	0.698068	0.258036
	FBgn0003983	Vm34Ca	0	0.380367	0	0
	FBgn0032522	CG16848	8.36159	0.99467	9.60571	4.79118
	FBgn0032523	CG16956	0	0	0	0
	FBgn0264432	CG43850	0.413346	0	0	0.665513
	FBgn0263354	CG42784	0.0929893	0.225909	0.250995	0.370403
	FBgn0026760	Tehao	1.33311	1.87155	1.07646	1.70021
	FBgn0032524	CG9267	31.1331	33.5072	48.1799	44.8507
	FBgn0032525	Hsp60D	7.20121	0.853163	4.72283	3.59537
	FBgn0261991	CG42809	0	0	0	0
	FBgn0261992	CG42810	52.061	7.3059	42.3924	27.3924
	FBgn0023407	B4	1.89721	0.929643	1.89664	1.19914
	FBgn0053640	CG33640	0	0	0	0
	FBgn0053641	CG33641	0	0	0	0
	FBgn0053642	CG33642	0	0	0	0
	FBgn0053643	CG33643	0	0	0	0
	FBgn0053644	CG33644	0	0	0	0
	FBgn0053645	CG33645	0	0	0	0
	FBgn0028943	CG15638	10.521	0.365554	16.8865	5.94743
	FBgn0028942	CG16852	12.0412	1.20267	9.63902	5.90653
	FBgn0028941	CG16853	7.54518	0.303246	4.93648	2.25801
	FBgn0032530	CG9263	8.46437	1.18262	5.66543	2.26289
	FBgn0259984	kuz	6.38812	5.03653	6.15479	4.29766
	FBgn0262194	mir-2489	0	0	0	0
	FBgn0028513	CG9254	37.1139	4.26335	28.1484	19.0642
	FBgn0263329	CR43410	6.77198	0.362029	3.23783	3.36492
	FBgn0028546	ics	29.6993	24.6322	26.3926	22.4647
	FBgn0028527	CG18507	10.9309	7.42404	9.56158	5.09161
	FBgn0051814	CG31814	0	0.0924184	0.0473196	0.0698837
	FBgn0028848	CG7311	13.4311	1.84313	9.9293	5.62363
	FBgn0028847	CG9014	21.9199	3.1489	15.5901	9.13417
	FBgn0051813	CG31813	0	0	0	0
	FBgn0262272	mir-1002	0	0	0	0
	FBgn0262332	mir-968	0	0	0	0
	FBgn0028541	TM9SF4	25.4837	24.0294	24.1131	26.0079
	FBgn0263206	CG43376	0	0	0	0
	FBgn0028540	CG9008	6.7827	5.60877	7.06879	6.94307
	FBgn0051845	CR31845	0.935531	0.327127	0.992789	1.49857
	FBgn0024846	p38b	7.74856	9.49456	6.00279	6.57325
	FBgn0028932	CG16890	12.9278	7.68137	17.3796	9.29582
	FBgn0028539	CG31731	29.5816	19.8291	28.9774	22.5592
	FBgn0028931	CG16863	1.84338	0.506178	1.37898	0.498029
	FBgn0028538	sec71	10.5984	7.18566	7.9054	8.43007
	FBgn0027844	CAH1	7.29441	10.5798	5.65788	9.64012
	FBgn0028658	adat	12.4846	13.8256	11.4962	11.3054
	FBgn0028919	CG16865	6.3465	6.12538	8.60393	5.60647
	FBgn0032533	CG16888	3.41252	1.18821	8.90683	1.3741
	FBgn0001965	Sos	3.3737	2.82357	2.88358	2.19581
	FBgn0000153	b	0.409979	0.12186	1.41146	0
	FBgn0004406	tam	1.73933	1.51079	1.2836	1.31269
	FBgn0001961	Sop2	91.9358	68.9978	121.308	64.7966
	FBgn0015271	Orc5	2.48105	1.13476	1.50441	0.860865
	FBgn0004407	DNApol-gamma35	11.4898	10.3042	10.072	11.2863
	FBgn0026373	RpII33	16.12	12.2804	16.7162	10.1239
	FBgn0260407	mRpS23	13.8836	11.2336	13.9659	11.1456
	FBgn0028509	cenG1A	3.73591	2.35421	3.14494	2.78885
	FBgn0053307	CG33307	241.38	591.021	190.777	583.545
	FBgn0053306	CG33306	16.1015	32.6728	39.5982	0
	FBgn0028920	CG8997	429.483	1177.74	1025.32	197.895
	FBgn0028534	CG7916	89.0451	138.788	246.063	1.04833
	FBgn0028533	CG7953	369.292	824.566	670.636	170.185
	FBgn0028532	CG7968	5.02167	22.4063	8.87769	0
	FBgn0019890	Smg5	28.5484	15.6978	30.0504	16.8197
	FBgn0012037	Ance	70.604	54.3337	91.3501	33.0537
	FBgn0032535	Ance-2	0.0968362	0	0	0
	FBgn0025115	Acyp	3.50089	0	6.61562	0.943827
	FBgn0032536	Ance-3	0	0.0399564	0	0
	FBgn0028938	CG16886	0.52498	0.526348	0.0806715	0.119593
	FBgn0261628	CG42711	0	1.14295	0	0.660337
	FBgn0032538	CG16885	13.3893	36.1651	10.1467	56.1482
	FBgn0028544	CG16884	12.1054	27.4635	8.08356	49.6855
	FBgn0261514	nimA	0.475226	0.167067	0.256174	0.852776
	FBgn0027929	nimB1	2.93262	2.57566	1.72854	1.64461
	FBgn0028543	nimB2	228.425	302.827	259.244	330.727
	FBgn0054003	nimB3	409.649	417.267	513.978	520.408
	FBgn0028542	nimB4	37.9179	27.1906	57.6136	41.7505
	FBgn0028936	nimB5	60.558	56.4722	88.433	61.7563
	FBgn0028430	He	7.85158	7.30611	13.088	8.40706
	FBgn0259896	nimC1	3.45142	2.11896	1.57658	0.550539
	FBgn0028940	Cyp28a5	102.141	94.1553	71.1805	78.222
	FBgn0028939	nimC2	271.263	69.6777	390.759	60.4892
	FBgn0003255	rk	6.05542	1.65082	4.2126	1.71372
	FBgn0261582	CG42692	10.2413	0.850704	5.65321	2.36756
	FBgn0028909	tRNA:Q:34E	0	0	0	0
	FBgn0027348	bgm	10.6372	25.1628	7.5838	22.025
	FBgn0001967	nimC3	11.131	4.70421	16.7212	3.73456
	FBgn0028519	CG4500	267.099	102.669	287.334	106.955
	FBgn0028872	CG18095	11.3869	4.08524	4.43276	2.77508
	FBgn0028875	nAcRalpha-34E	0.0373503	0	0	0
	FBgn0260011	nimC4	0	0	0	0
	FBgn0028904	CG16879	0	0.0570829	0	0
	FBgn0028526	CG15293	65.8905	197.367	45.6785	289.922
	FBgn0051769	CG31769	26.7807	86.9316	40.4732	125.084
	FBgn0028906	CG17341	0	0.0292212	0	0
	FBgn0263037	CG43332	0	0	0	0
	FBgn0263038	CG43333	0.0387812	0	0.0418548	0
	FBgn0016930	smi35A	2.6447	0.86503	5.78403	1.73999
	FBgn0261563	wb	0.470077	0.201911	0.314564	0.173625
	FBgn0052971	CG32971	36.8769	10.806	22.5374	20.9268
	FBgn0263648	CR43639	2.61505	0	2.27343	2.10657
	FBgn0263649	CR43640	0.477248	0.133916	0.717555	0
	FBgn0261529	ms(2)34Fe	4.81741	0.31423	3.23217	2.08266
	FBgn0028916	CG33090	2.63691	5.0065	1.68498	3.11236
	FBgn0028531	CG15286	14.192	1.4222	11.0931	7.85621
	FBgn0264253	Send2	0	0	0	0
	FBgn0028530	mTTF	10.0219	8.51861	10.601	8.80206
	FBgn0261534	l(2)34Fc	25.9235	39.7423	32.2814	41.6528
	FBgn0262354	CG43052	44.6292	9.21449	32.3671	21.5898
	FBgn0261535	l(2)34Fd	3.52661	2.42238	2.01815	3.46984
	FBgn0015791	Rab14	43.7379	22.3669	47.531	25.4637
	FBgn0001970	Pgant35A	0.0809581	0	0.0870543	0
	FBgn0263440	CR43463	4.62055	3.19873	2.34233	2.50315
	FBgn0015546	spel1	2.25692	0.943276	1.96926	0.941257
	FBgn0020258	ppk	0	0	0.151299	0
	FBgn0004858	elB	3.31154	1.46676	2.25197	1.38013
	FBgn0032546	pburs	0	0	0	0
	FBgn0028871	Cpr35B	0	0.471961	0.711472	0.543384
	FBgn0028844	CG15283	10.1515	3.17431	10.299	7.31374
	FBgn0005771	noc	14.4287	14.5011	10.5129	9.92447
	FBgn0028882	tRNA:P:35Bd	0	0	0	0
	FBgn0011862	tRNA:G3:35Ba	0	0	0	0
	FBgn0011863	tRNA:G3:35Bb	0	0	0	0
	FBgn0011864	tRNA:G3:35Bc	0	0	0	0
	FBgn0053648	CG33648	0	0	0	0
	FBgn0011865	tRNA:G3:35Bd	0	0	0	0
	FBgn0011866	tRNA:G3:35Be	0	0	0	0
	FBgn0250844	CG4218	39.596	5.07489	35.8168	21.2019
	FBgn0028913	CG3473	11.5481	1.18488	9.28727	8.1857
	FBgn0261566	CG42680	0	0	49.1798	0
	FBgn0028912	tRNA:P:35Ba	0	0	0	0
	FBgn0028911	tRNA:P:35Bb	0	0	0	0
	FBgn0028910	tRNA:P:35Bc	0	0	0	0
	FBgn0003016	osp	4.02093	2.60618	3.27704	2.49105
	FBgn0263330	CR43411	0.884267	0.609912	0	0
	FBgn0000055	Adh	3037.91	3749.96	3454.6	3741.17
[truncated: 13,606 more rows]

## Sheet: Persistent adult mtUPR (Fig4)
			Adult fat body
			FPKM DaGS X delta OTC		FPKM PGAM51, DaGS X PGAM51, delta OTC
	tracking_id	gene_short_name	-RU468	+RU468	-RU468	+RU468
	FBgn0031208	CG11023	0.0943415	0	0.0921628	0.198724
	FBgn0002121	l(2)gl	29.0218	16.5038	17.4921	18.6649
	FBgn0031209	Ir21a	0	0	0.0610386	0.131619
	FBgn0263584	CR43609	0.074711	0.137894	0.14586	0.0786231
	FBgn0051973	Cda5	1.93535	2.02968	2.41482	1.97845
	FBgn0067779	dbr	7.15344	5.48498	6.02504	5.86625
	FBgn0031213	galectin	60.8132	58.9063	66.0489	63.0641
	FBgn0031214	CG11374	0.510625	0.117823	0.124882	0.26915
	FBgn0002931	net	2.78726	0.762675	1.71448	1.08772
	FBgn0031216	CG11376	6.89394	6.63101	7.14301	6.168
	FBgn0031217	CG11377	16.048	16.5159	18.3343	21.5826
	FBgn0026787	Nhe1	13.8275	12.8796	13.8076	10.0603
	FBgn0005278	Sam-S	167.801	155.681	166.211	193.144
	FBgn0031228	CG11455	199.833	208.563	199.727	213.071
	FBgn0031229	CG3436	19.206	19.0574	23.8822	18.4831
	FBgn0031227	CG3709	2.21661	2.51067	1.67378	3.71426
	FBgn0031219	CG13694	0.48555	0.448189	0.951327	0.68326
	FBgn0031220	CG4822	76.9719	84.1915	78.1987	73.451
	FBgn0025683	CG3164	437.17	493.992	423.825	376.051
	FBgn0001142	Gs1	105.266	143.235	96.6711	96.9908
	FBgn0051975	CG31975	3.57456	2.07604	0.51624	0.280883
	FBgn0051974	CG31974	90.1777	70.0872	91.7315	71.5036
	FBgn0031224	CG11454	18.1712	14.4874	13.7806	12.8767
	FBgn0259818	CG42399	0.390122	0.387675	0.263168	0.252275
	FBgn0053635	CG33635	5.174	4.77705	7.37871	7.12153
	FBgn0016977	spen	9.06576	7.93049	8.16224	8.78334
	FBgn0031231	mRpL10	15.4054	15.5856	19.2652	18.293
	FBgn0031233	CG11490	9.40107	11.377	9.33469	10.7757
	FBgn0031232	CG11617	0.42499	0.261494	1.48281	1.19537
	FBgn0086902	kis	13.6431	11.2568	11.1036	14.6315
	FBgn0031235	CG13693	0.206805	0	0.101056	0.10892
	FBgn0263465	snoRNA:kis-a	0	0	0	0
	FBgn0262252	mir-965	0	0	0	0
	FBgn0022246	Rpp30	5.7679	4.61456	4.3374	5.28104
	FBgn0031238	CG3645	9.59064	9.39316	10.9008	10.822
	FBgn0031239	CG17075	0.158861	0.183583	0.272094	0.501651
	FBgn0031240	CG3345	0.0684774	0.126387	0.0668283	0.216145
	FBgn0086912	mbm	8.96346	6.6539	6.85401	11.9025
	FBgn0086856	CG11555	13.6776	14.3109	17.0181	15.9134
	FBgn0086855	CG17078	5.55362	6.16026	4.26082	6.59758
	FBgn0003444	smo	4.29077	5.51356	5.47257	6.53363
	FBgn0031244	CG11601	25.0285	26.6896	23.4467	19.848
	FBgn0031245	CG3625	112.319	104.176	105.428	86.7931
	FBgn0025686	CG11592	25.8966	30.0155	39.4555	43.8052
	FBgn0031247	CG11562	12.3369	11.8859	10.0274	11.6459
	FBgn0017457	U2af38	14.2799	12.2694	10.6578	15.0613
	FBgn0024352	Hop	68.8758	78.515	60.0364	53.6989
	FBgn0020622	Pi3K21B	14.2749	7.83447	8.703	7.73353
	FBgn0004611	Plc21C	15.2865	15.9395	17.3669	15.2349
	FBgn0264086	CG43755	0.663848	0.369525	0.195626	0.285715
	FBgn0263872	CR43719	0	0	0	0
	FBgn0031248	CG11912	10.4122	0.196169	0.417198	0.67392
	FBgn0031249	CG11911	311.779	0.535132	1.8954	8.77829
	FBgn0053127	CG33127	103.728	0.17378	16.0619	1.39199
	FBgn0051921	CG31921	0	0.188822	0.0665602	0.287038
	FBgn0031250	Ent1	63.5736	82.8627	94.3192	92.1934
	FBgn0000061	al	0.0941419	0	0	0
	FBgn0263871	CR43718	0	0	0	0
	FBgn0031251	CG4213	0.559268	0.299184	0.908518	0.50945
	FBgn0003278	RpI135	4.10087	3.57399	5.33118	6.41931
	FBgn0263350	alpha-Adaptin	15.6563	15.5259	18.0641	20.1775
	FBgn0263933	ebi	11.4939	8.62899	8.73849	10.037
	FBgn0031252	CG13690	0.882671	0.407362	0.576119	1.86222
	FBgn0002593	RpLP1	5212.09	5849.48	6575.82	6555.85
	FBgn0031253	CG11885	20.1794	19.7569	17.9697	18.4635
	FBgn0031254	CG13692	0	0	0	0.332734
	FBgn0031255	BBS8	0.199415	0.0920211	0.29229	0
	FBgn0004583	ex	11.6236	9.50493	10.1955	8.6904
	FBgn0015924	crq	55.1243	50.3763	55.6076	56.46
	FBgn0263870	CR43717	0.39325	0	0	0
	FBgn0031256	CG4164	34.7357	44.311	50.3012	47.9446
	FBgn0262510	CR43080	16.0404	19.395	25.2012	25.6578
	FBgn0031257	CG4133	0.124968	0.297746	0.125918	0.407314
	FBgn0031258	CG4297	6.63009	6.69047	7.12561	7.21121
	FBgn0027592	MED15	6.16124	6.38914	5.39188	6.01374
	FBgn0003963	ush	3.07838	1.94083	3.57088	3.77066
	FBgn0043364	cbt	71.597	70.4223	65.8068	60.1219
	FBgn0010602	lwr	37.4975	37.6461	35.3624	43.8192
	FBgn0031260	Spp	50.7566	48.5685	47.3519	55.6316
	FBgn0031261	nAcRbeta-21C	30.214	29.4524	16.153	14.07
	FBgn0005660	Ets21C	8.67342	2.71007	0.930151	0.646702
	FBgn0260933	rempA	0.995079	0.350525	0.616943	0.314244
	FBgn0031263	CG2789	235.904	142.682	206.895	151.477
	FBgn0031264	CG11835	1.03641	0.956421	2.06302	1.46168
	FBgn0031265	CG2794	7.83825	7.36621	8.21205	9.83698
	FBgn0021874	Nle	8.50064	8.14726	11.6121	13.2042
	FBgn0031266	CG2807	10.9523	10.961	10.376	9.68912
	FBgn0031267	Ipk2	23.5388	15.0209	7.68131	7.6633
	FBgn0031268	cold	10.7086	11.5836	9.34515	10.7739
	FBgn0013323	Ptth	1.82003	1.00804	4.10421	1.34549
	FBgn0023489	Pph13	0.180108	0	0	0
	FBgn0010323	Gsc	0	0	0	0.0840745
	FBgn0031270	CG13689	4.53839	3.9113	5.96223	5.45375
	FBgn0263657	CR43648	0	0	0	0
	FBgn0263658	CR43649	0	0	0	0
	FBgn0040106	lectin-21Cb	0	0	0	0
	FBgn0040107	lectin-21Ca	0	0	0	0
	FBgn0031273	CG2839	0	0	0	0
	FBgn0000497	ds	0.238467	0.115808	0.0733249	0.0395434
	FBgn0011244	Hsp60B	0	0	0	0
	FBgn0026438	Eaat2	0.319588	0.132391	0.810043	0.905086
	FBgn0031275	GABA-B-R3	0.076636	0.0641376	0	0.369456
	FBgn0031276	CG12506	0	0	0	0
	FBgn0040725	CG13946	0	0	0	0
	FBgn0031277	CG13947	0	0	0.992192	129.703
	FBgn0041250	Gr21a	0.122753	0	0	0.0790087
	FBgn0031279	CG3544	0	0.0859861	0	0
	FBgn0000442	Pkg21D	15.4288	8.17808	3.48365	2.28037
	FBgn0051658	Nnf1b	0	0.233342	0.497023	0.802613
	FBgn0086130	KH1	5.9171	5.27891	4.33627	6.33571
	FBgn0031281	Saf6	1.99078	1.95988	1.67383	2.09875
	FBgn0031282	Pex12	8.8789	11.8025	12.1852	10.8758
	FBgn0031283	CG15880	0.213084	0.590142	0.627549	1.12634
	FBgn0031284	CG3876	3.08427	3.43978	4.27459	3.65797
	FBgn0015621	Clp	5.59262	4.10317	4.77275	4.3863
	FBgn0031285	CG3662	206.012	169.57	176.079	165.381
	FBgn0031286	CG3862	5.99312	6.47057	5.52775	5.83832
	FBgn0010583	dock	9.33971	8.07906	7.09186	7.37065
	FBgn0020304	drongo	40.2204	42.4748	44.8305	43.4618
	FBgn0031287	CG4291	4.2459	5.13529	5.01685	5.71433
	FBgn0020545	kraken	137.36	112.681	123.92	118.694
	FBgn0031288	CG13949	0	0	0	0
	FBgn0262177	mir-375	0	0	0	0
	FBgn0031289	CG13950	1.53945	0.631567	0.16763	0.541737
	FBgn0029095	aru	10.6152	8.95203	8.35627	9.46337
	FBgn0086031	snoRNA:Me28S-U1230	0	0	0	0
	FBgn0020305	dbe	9.27614	8.98326	7.14777	11.3912
	FBgn0053526	PNUTS	47.8625	43.5145	41.8126	47.0202
	FBgn0002936	ninaA	0.220746	0	0	0.233428
	FBgn0031292	CG15824	0	0.024055	0.0253975	0.0273903
	FBgn0002563	Lsp1beta	5.81237	24.1954	1.35615	2.79136
	FBgn0003916	snRNA:U1:21D	0	2.79335	0	3.45235
	FBgn0046113	GluRIIC	0.813976	1.80274	1.5349	0.970159
	FBgn0028481	CG4341	0.0423313	0	0.0412674	0.489545
	FBgn0031294	IA-2	6.19843	2.77946	3.53598	6.76149
	FBgn0031295	CG4375	0	0	0	0
	FBgn0031296	CG4415	0	0	0	0
	FBgn0003310	S	4.03901	3.31786	3.35883	5.55
	FBgn0015905	ast	3.8828	3.52799	4.07932	5.59208
	FBgn0031298	Atg4	41.9197	49.9445	44.4002	40.8069
	FBgn0031299	CG4629	11.4618	10.013	5.19591	5.89831
	FBgn0261938	mtRNApol	6.40426	6.30411	7.21321	7.66645
	FBgn0031301	CG14339	0	0.0458299	0	0
	FBgn0031302	CG14340	0	0	0	0.189723
	FBgn0016926	Pino	454.322	458.108	491.089	336.117
	FBgn0031304	CG4552	29.3549	24.285	24.7849	18.6034
	FBgn0031305	Iris	164.639	207.49	218.151	193.191
	FBgn0031306	CG4577	6.33819	4.02046	4.4415	9.78235
	FBgn0031307	MFS3	6.04542	2.36922	1.13213	2.17934
	FBgn0031308	CG4749	4.22723	4.29155	4.02838	3.45117
	FBgn0031309	Tfb4	2.60995	3.61391	3.10781	3.54439
	FBgn0031310	CG4764	21.6253	22.1997	15.539	17.722
	FBgn0261458	capt	59.5647	34.041	26.5267	27.0449
	FBgn0264267	CR43767	0	0	0	0
	FBgn0031312	Tango14	21.9493	19.3114	21.5143	22.4177
	FBgn0031313	CG5080	149.873	170.219	184.298	180.388
	FBgn0031314	CG4785	3.5095	3.72468	3.94182	3.32537
	FBgn0031315	CG14341	20.8873	25.0143	26.3943	19.3941
	FBgn0024314	Plap	23.4381	23.036	23.7367	20.9144
	FBgn0051922	CG31922	2.38821	5.29525	2.84444	5.09453
	FBgn0031317	CG5118	23.3246	19.086	28.7835	11.5351
	FBgn0031318	CG4887	15.6448	9.96329	13.3747	11.863
	FBgn0031319	CG4896	6.67488	5.69685	7.71957	5.84914
	FBgn0031320	CG5126	24.0664	28.2862	20.1023	17.8751
	FBgn0031321	Tgt	4.49003	4.04042	5.26765	5.67718
	FBgn0031322	CG5001	19.6066	14.51	15.3509	13.0457
	FBgn0031323	CG5139	0	0	0.267661	0
	FBgn0263080	CG43348	133.017	3.42358	22.6744	1.34605
	FBgn0263081	CG43349	330.942	21.9127	49.9094	11.5261
	FBgn0040723	CG5011	136.018	10.6077	5.71951	3.07082
	FBgn0031324	CG14342	0.255683	0	0	0.270684
	FBgn0262944	CR43263	0	0	0	0
	FBgn0259229	CG42329	4.98941	5.28884	3.28989	4.04347
	FBgn0031327	CG5397	28.4116	23.6277	36.6741	24.3294
	FBgn0041097	robo3	0	0.0532476	0	0.181907
	FBgn0011294	a5	0	0	0	0
	FBgn0031331	CG5440	0	0	0	0
	FBgn0053923	CG33923	0	0	0	0
	FBgn0053922	CG33922	0	0	0	0
	FBgn0026141	Cdlc2	0	0	0	0
	FBgn0031332	CG5556	0	0	0	0
	FBgn0031333	CG5561	0	0	0	0
	FBgn0051924	CG31924	0	0	0	0
	FBgn0031335	CG5565	0	0	0	0
	FBgn0051659	CG31659	0.336348	0	0	0
	FBgn0053126	NLaz	94.1737	57.5746	30.4019	48.1226
	FBgn0031337	CG14346	0	0	0	0
	FBgn0002543	lea	5.2209	5.05252	4.11863	3.45178
	FBgn0263320	CG43401	0	0	0	0
	FBgn0003926	snRNA:U3:22A	0	0	0	0
	FBgn0263321	CG43402	213.249	217.427	138.762	144.926
	FBgn0051928	CG31928	0	0.120531	0.638834	11.8405
	FBgn0053128	CG33128	0	0.118912	0	0
	FBgn0051926	CG31926	0	0	0.284222	5.81857
	FBgn0051661	CG31661	0.305042	0	0.298717	5.47128
	FBgn0031343	CG18131	0	0	0	0.253055
	FBgn0031344	CG7420	8.65769	8.20084	6.79414	5.88182
	FBgn0031345	CG18132	0	0	0	0
	FBgn0001174	halo	0	0	0	0
	FBgn0026398	Or22a	0	0	0	0
	FBgn0026397	Or22b	0	0	0.132882	0.143186
	FBgn0261509	haf	0.349088	0.390057	0.185587	0.366783
	FBgn0031347	CG10869	0.0748202	0.207144	0.438223	0.157477
	FBgn0051935	CG31935	11.9	12.8199	11.7115	12.1748
	FBgn0031351	CG14352	0.54601	2.01609	1.96289	1.92212
	FBgn0021906	RFeSP	296.557	312.061	277.522	262.925
	FBgn0086758	chinmo	0.1541	0.0463978	0.184333	0.145225
	FBgn0011570	cpb	36.8857	21.3836	17.6693	17.9387
	FBgn0031356	CG17660	27.7926	23.3756	20.3268	16.954
	FBgn0031357	mRpL48	11.0423	13.2275	11.7602	12.0189
	FBgn0086698	frtz	5.55607	4.11408	3.88804	3.98053
	FBgn0031359	CG18317	24.8778	28.3364	27.5293	26.4882
	FBgn0000579	Eno	700.216	753.425	668.199	735.952
	FBgn0260648	Rrp40	5.2823	11.6616	10.1526	14.8188
	FBgn0031360	CG31937	208.083	270.749	207.343	156.263
	FBgn0031361	CG17652	9.02463	8.12825	8.42266	6.98259
	FBgn0264494	CG17646	226.531	260.799	243.353	284.398
	FBgn0027597	CG17712	8.68782	5.53392	5.98396	5.93278
	FBgn0031364	CG17648	0	0	0	0
	FBgn0041249	Gr22f	0	0	0	0
	FBgn0031365	CG17650	0.447062	0.412979	0.443149	0.476338
	FBgn0045497	Gr22e	0	0	0	0
	FBgn0045498	Gr22d	0.155456	0	0	0
	FBgn0045499	Gr22c	0	0	0	0
	FBgn0045500	Gr22b	0	0	0	0
	FBgn0045501	Gr22a	0	0	0	0
	FBgn0051933	CG31933	0	0	0	0
	FBgn0051664	CG31664	2.65996	5.84085	3.85273	5.79478
	FBgn0031367	c-cup	0	0	0	0
	FBgn0262275	mir-2280	0	0	0	0
	FBgn0051665	wry	0	0	0.0277323	0.657578
	FBgn0051663	CG31663	34.3766	18.9655	5.42326	0.958661
	FBgn0031372	CG7295	0.167869	0	0	0
	FBgn0031373	CG15358	49.0252	73.6248	130.673	80.3996
	FBgn0031374	CG7337	20.5398	21.1853	18.6455	18.5653
	FBgn0011859	tRNA:G3:22BCa	0	0	0	0
	FBgn0040719	CG15357	0	0	0	0
	FBgn0053673	CG33673	0	0	0	0
	FBgn0031375	erm	0	0	0	0
	FBgn0051942	tRNA:CR31942	0	0	0	0
	FBgn0031376	Der-1	78.5952	85.1666	125.916	111.473
	FBgn0031377	CG15356	3.44089	3.25987	2.37082	3.95528
	FBgn0031378	CG15362	7.46597	8.44932	6.15413	5.35169
	FBgn0031379	CG7289	14.3152	17.6387	20.1196	13.5766
	FBgn0001125	Got2	364.123	381.267	173.4	239.4
	FBgn0031381	Npc2a	52.9693	47.0266	50.0864	62.6647
	FBgn0262148	CR42874	0.143669	0	0.140639	0.151536
	FBgn0043539	Obp22a	0	0	0	0
	FBgn0053543	CG33543	0.177411	0.109145	0.230763	0.622017
	FBgn0263441	CR43464	0	0	0.131886	0
	FBgn0040718	CG15353	58.7108	71.3505	68.0988	99.4833
	FBgn0040717	Nplp4	11.4645	12.7235	6.91054	8.23293
	FBgn0051943	tRNA:CR31943	0	0	0	0
	FBgn0051944	tRNA:CR31944	0	0	0	0
	FBgn0031384	CG4238	6.31413	8.27764	9.9581	9.23075
	FBgn0051939	tRNA:CR31939	0	0	0	0
	FBgn0051940	tRNA:CR31940	0	0	0	0
	FBgn0051669	tRNA:CR31669	0	0	0	0
	FBgn0011860	tRNA:G3:22BCb	0	0	0	0
	FBgn0259192	CG42296	0.109264	0.352903	0	0.0574548
	FBgn0259230	lectin-22C	0.249045	0	0	0
	FBgn0003557	Su(dx)	26.8473	18.9486	17.6689	14.9874
	FBgn0028952	Kebab	0.699858	0.215995	0	0.407637
	FBgn0026396	Or22c	0	0	0	0
	FBgn0053516	dpr3	1.68579	1.90693	1.43209	1.48693
	FBgn0031388	CG12674	0	0	0.305125	0.164367
	FBgn0031389	CG4259	71.1529	86.0246	98.3813	99.1196
	FBgn0004507	GlyP	355.626	573.682	359.824	380.554
	FBgn0031390	tho2	10.0351	8.63559	8.20157	7.94806
	FBgn0031391	CG11723	6.26529	5.13982	6.89953	5.44658
	FBgn0027509	CG7261	5.59101	4.32465	4.6087	3.32757
	FBgn0031392	AIF	12.2885	10.2114	9.37416	11.6246
	FBgn0031393	CG15382	0	0.165649	0.351844	0.1895
	FBgn0000097	aop	9.92415	6.46853	6.81381	7.83176
	FBgn0264082	CG43751	0.117853	0	0.115247	0
	FBgn0051946	tRNA:CR31946	0	0	0	0
	FBgn0031395	CG10874	20.6896	24.0196	26.4882	24.7098
	FBgn0085201	CG34172	2.46328	9.34513	30.5209	36.4938
	FBgn0051668	CG31668	0.0858721	0	0	0
	FBgn0053124	CG33124	0	0	0	0
	FBgn0031397	CG15385	8.81995	12.7564	15.4298	14.082
	FBgn0010288	Uch	26.3376	23.1698	30.4969	29.6774
	FBgn0085203	CG34174	2.25593	2.60372	1.38805	2.09157
	FBgn0031398	CG10880	3.04703	3.19641	3.92694	3.79365
	FBgn0259717	CG42371	32.1691	36.855	39.3192	37.2619
	FBgn0031399	mio	10.2124	12.0729	13.0301	12.8302
	FBgn0031401	papi	14.5612	12.2006	16.6429	16.3761
	FBgn0031403	CG15387	5.9342	4.65754	5.48653	4.71818
	FBgn0010704	l(2)s5379	56.8192	45.5407	47.1166	42.2156
	FBgn0262126	gho	29.3406	27.3242	28.5243	28.6497
	FBgn0051679	Tengl3	0	0	0	0
	FBgn0052463	Tengl2	0	0	0	0
	FBgn0051682	Tengl1	0	0.151962	0	0
	FBgn0031405	CG4267	23.0296	20.1438	12.3156	13.5532
	FBgn0051686	CG31686	16.4766	22.5579	9.78794	2.70926
	FBgn0262106	CR42859	0	0	0.340913	0
	FBgn0011832	Ser12	0	0	1.80219	0
	FBgn0042186	CG17239	57.593	64.3816	63.5014	4.92192
	FBgn0042187	CG17234	11.3733	6.34939	1.0408	0.280095
	FBgn0031406	Send1	43.4578	65.8531	61.6392	0.92833
	FBgn0031407	CG4270	0	0	0	0
	FBgn0054049	CG34049	0	0	0	0
	FBgn0250841	CG17242	0	0	0	0
	FBgn0264084	CR43753	0	0	0	0
	FBgn0264085	CR43754	1.01934	0.941123	0.250596	0
	FBgn0031409	CG4271	0.782696	1.20442	0.256624	0
	FBgn0051681	CG31681	85.743	101.323	55.4978	7.13071
	FBgn0261523	CG42658	0	0	0	0
	FBgn0031410	CG17237	0	0	0	0
	FBgn0028570	robl22E	0	0	0	0
	FBgn0051949	CG31949	0	0	0	0
	FBgn0031412	CG16995	3.37768	0.779682	3.04805	0.298242
	FBgn0031414	eys	0.185059	0.068205	0.0198549	0.194369
	FBgn0031413	CG9967	1.82294	1.94993	1.25966	2.63725
	FBgn0014010	Rab5	136.479	111.887	114.357	98.7934
	FBgn0261647	Axud1	7.63138	7.43014	6.77697	7.77527
	FBgn0031417	CG3597	154.451	211.869	268.649	254.434
	FBgn0031418	CG3609	131.402	84.9601	134.89	168.178
	FBgn0031419	CG15390	2.85249	1.88092	2.79919	2.58399
	FBgn0031420	CG9866	6.79542	5.30393	7.14362	5.78291
	FBgn0264672	Eogt	5.52922	9.78791	7.0905	6.87139
	FBgn0031422	CG9870	2.33023	1.50548	1.02535	0.859469
	FBgn0031423	CG3557	0	0	0	0
	FBgn0264081	CG43750	0	0	0	0
	FBgn0031424	VGlut	0	0	0.0280715	1.02281
	FBgn0031426	CG18641	0.193507	0.0892939	0.189064	0.509468
	FBgn0051948	CG31948	0.154817	0	0.151619	0
	FBgn0085477	CG34448	0	0	0	0
	FBgn0085476	CG34447	0	0	0	0
	FBgn0031428	CG9886	28.466	44.6898	32.1884	40.2958
	FBgn0000490	dpp	4.04972	3.87317	5.08041	5.25122
	FBgn0012017	tRNA:Y1:22Fb	0	0	0	0
	FBgn0012016	tRNA:Y1:22Fa	0	0	0	0
	FBgn0031429	CG15393	0	0.743597	0.808938	0.867098
	FBgn0015816	Slh	22.2137	28.6582	26.9972	28.3871
	FBgn0011818	oaf	6.30974	7.61551	6.2516	9.43392
	FBgn0031430	CG3528	0	0	0	0
	FBgn0031431	CG3515	0	0	0	0.119326
	FBgn0031432	Cyp309a1	68.128	10.2496	4.17498	4.38726
	FBgn0041337	Cyp309a2	28.2819	39.2358	17.7343	13.8328
	FBgn0085343	CG34314	1.82132	2.4164	1.22426	1.31942
	FBgn0031434	insv	0.720418	1.32977	0.502896	1.73451
	FBgn0031435	CG9883	0.920216	2.3356	1.01223	2.30301
	FBgn0031436	CG3214	174.278	224.798	178.046	187.235
	FBgn0031437	p16-ARC	36.1268	27.0711	23.1758	24.3939
	FBgn0026479	Drp1	55.1591	49.3492	50.686	43.167
	FBgn0250835	CG15394	9.35703	9.25806	3.95637	7.44892
	FBgn0031440	CG15395	0	0	0	0
	FBgn0263322	CG43403	0	0	0	0
	FBgn0264434	CR43852	0	0	0	0
	FBgn0031441	CG9962	0	0	0	0
	FBgn0264433	CG43851	0	0	0	0
	FBgn0053125	CG33125	0.0413517	0	0	0
	FBgn0031442	Prosbeta4R1	0	0	0	0
	FBgn0026395	Or23a	0	0	0	0
	FBgn0031443	Prosbeta4R2	0	0	0	0
	FBgn0031444	CG9879	0	0	0	0
	FBgn0041248	Gr23a	0	0	0	0
	FBgn0051690	CG31690	0.249692	0.184334	0.0973963	0.210042
	FBgn0031446	CG15398	0	0	0	0
	FBgn0031449	CG31689	110.235	111.345	76.6907	90.6204
	FBgn0263564	mir-4914	0	0	0	0
	FBgn0031450	Hrs	19.2472	17.1252	15.5231	12.9115
	FBgn0031451	CG9961	0	0	0	0.129076
	FBgn0031452	Cwc25	6.633	5.11661	6.38457	6.67311
	FBgn0250906	Pgk	264.906	276.295	245.282	279.863
	FBgn0031453	CG9894	234.217	267.119	266.366	242.316
	FBgn0031455	snapin	15.3717	15.5941	21.55	14.02
	FBgn0031456	Trn-SR	2.98129	4.37471	3.00249	2.62084
	FBgn0031457	CG3077	4.8732	3.92117	5.62237	5.92717
	FBgn0031458	aph-1	17.2455	13.6466	15.3976	17.0539
	FBgn0026324	Taf10b	15.5745	17.0159	12.5101	15.391
	FBgn0019830	colt	177.907	244.634	155.016	145.634
	FBgn0028398	Taf10	39.637	46.4221	37.815	31.798
	FBgn0031459	CG2862	233.474	260.383	232.307	227.145
	FBgn0031460	CG15399	1.89401	3.27863	2.7917	2.25436
	FBgn0004242	Syt1	0.440388	0.334806	0.457055	3.47149
	FBgn0264369	CR43821	0	0	0	0
	FBgn0031461	daw	50.4363	48.865	68.8752	65.5637
	FBgn0031462	CG2964	0	0	0	0
	FBgn0031463	CG15400	0	0	0	0
	FBgn0031464	Duox	1.72905	1.15534	1.04571	5.2001
	FBgn0031465	CG3123	0	0	0	0.0905035
	FBgn0031466	CG3119	0.316927	0.139534	0.312453	0
	FBgn0031467	Cpr23B	0.172977	0.159672	0.169532	0
	FBgn0031468	CG2975	0.359373	0.580407	0.965315	0.75676
	FBgn0031469	CG18558	0.0937394	0	0	0
	FBgn0031470	CG18557	0	0	0	0
	FBgn0031471	CG3117	0	0.326336	0	0
	FBgn0031472	CG2983	0	0	0	0
	FBgn0031473	CG3104	1.46704	2.59548	0.238988	0.386611
	FBgn0015521	RpS21	1791.23	1879.42	2466.28	2527.66
	FBgn0031474	CG2991	37.1765	31.7022	30.4747	23.9235
	FBgn0051694	CG31694	40.8282	40.5185	37.4905	36.7289
	FBgn0031476	CG8813	0.559954	1.5507	2.0134	1.38006
	FBgn0031478	CG8814	60.0601	70.4182	70.5492	68.1323
	FBgn0031479	Prx6005	18.3654	15.5075	13.4179	18.9487
	FBgn0051950	CG31950	8.01602	7.86906	13.4392	8.55671
	FBgn0028970	betaggt-II	21.7288	21.9702	21.013	16.0831
	FBgn0024947	NTPase	61.5182	54.3526	45.8929	39.1088
	FBgn0041111	lilli	11.3289	11.9658	10.5373	11.7766
	FBgn0010263	Rbp9	4.78546	4.36584	7.44199	6.75038
	FBgn0024920	Ts	2.9303	0.860565	0.521324	3.23013
	FBgn0004584	Rrp1	1.9946	1.78314	1.642	4.06524
	FBgn0260639	gammaTub23C	4.02617	3.80016	4.02227	2.69776
	FBgn0031483	CG9641	3.1422	2.31893	3.27629	4.53027
	FBgn0031484	CG3165	9.04181	5.97888	7.26327	4.98054
	FBgn0031485	CG9643	21.4301	13.2712	14.1386	16.3269
	FBgn0250786	Chd1	14.3456	12.4617	12.2974	13.3039
	FBgn0025109	Bem46	7.4024	6.92408	5.08294	7.16437
	FBgn0002989	okr	2.3854	3.35432	1.88364	3.10617
	FBgn0025681	CG3558	20.7786	16.8173	14.8095	12.8002
	FBgn0031488	CG17265	0.547193	0.367234	0.339569	1.20305
	FBgn0031489	CG17224	197.555	197.76	273.79	167.012
	FBgn0031490	CG17264	14.2967	12.7501	14.3075	6.13652
	FBgn0031491	alpha4GT1	22.9476	25.6906	26.3233	18.2845
	FBgn0031492	CG3542	6.88067	6.01711	6.2171	6.07244
	FBgn0031493	CG3605	11.9462	11.9694	12.9242	12.0664
	FBgn0031494	CG17219	3.69732	3.01889	3.47994	4.7995
	FBgn0031495	GABPI	11.9078	10.7322	10.1678	10.1059
	FBgn0031496	CG17258	0.0571123	0.158112	0	0.120136
	FBgn0031497	CG17259	50.237	37.9555	41.8106	47.1181
	FBgn0031498	CG17260	7.8819	9.62149	7.58611	6.56676
	FBgn0243513	cnir	2.42821	2.85308	3.68514	3.03456
	FBgn0031500	CG17221	14.4927	11.1423	16.5557	11.2816
	FBgn0031501	CG17261	6.54223	3.35666	6.46233	4.24782
	FBgn0042627	v(2)k05816	324.163	328.458	426.554	309.284
	FBgn0263847	CR43708	31.5862	9.76577	46.4701	12.0889
	FBgn0003934	snRNA:U5:23D	0	0	5.27498	0
	FBgn0027571	CG3523	1066.37	939.119	1289.17	1097.02
	FBgn0015600	toc	12.4966	13.3613	16.0958	11.4947
	FBgn0005779	PpD6	0	0	0	0
	FBgn0031504	CG15403	0	0	0	0
	FBgn0031505	CG12400	219.984	235.545	224.308	213.75
	FBgn0011648	Mad	19.7486	17.9707	16.2558	15.4579
	FBgn0260817	gkt	3.82703	3.98191	4.02886	3.75107
	FBgn0051953	CR31953	2.56145	3.02206	2.80215	2.86512
	FBgn0014906	Hydr2	26.4214	13.7677	8.8808	11.2803
	FBgn0011985	tRNA:S7:23Eb	0	0	0	0
	FBgn0085435	CG34406	0.526565	0.416522	0.587457	0.870803
	FBgn0011984	tRNA:S7:23Ea	0	0	0	0
	FBgn0051698	CG31698	0	0	0	0
	FBgn0031512	CG15404	0	0	0	0
	FBgn0085422	CG34393	0	0	0	0.179468
	FBgn0031513	CG3347	0	0	0	0
	FBgn0031514	CG3332	33.5992	8.26619	0.667605	2.02852
	FBgn0031515	CG9664	6.72646	6.74673	3.89404	4.5365
	FBgn0031516	CG9663	13.4046	10.4064	14.1632	12.3625
	FBgn0031518	CG3277	2.09332	0.214632	0.453574	0.0489087
	FBgn0031519	CG3326	0.942788	0.401562	0.353941	0.104198
	FBgn0031517	CG15406	182.99	127.459	41.829	0.329881
	FBgn0031520	CG8837	20.5657	16.9188	13.2724	0.881904
	FBgn0053281	CG33281	19.1135	15.7468	4.32774	0.682589
	FBgn0053282	CG33282	22.6845	18.8225	2.13219	0.114901
	FBgn0031522	CG3285	38.3357	32.4569	9.80595	0.333753
	FBgn0031523	CG15408	57.8361	39.0359	11.3397	0.93116
	FBgn0020445	E23	2.35043	2.5657	2.11696	3.51396
	FBgn0031526	CG8838	0	0	0	0
	FBgn0085423	CG34394	29.2746	19.4182	24.0317	20.9092
	FBgn0031528	CG15412	1.36762	0.841423	2.38577	2.16934
	FBgn0031529	CG9662	9.18996	14.7991	9.25856	10.4853
	FBgn0016698	Ptpa	10.0866	11.0553	9.25017	9.17079
	FBgn0259949	Sfp23F	0	0	0	0
	FBgn0259950	CG42460	0	0	0	0
	FBgn0085204	CG34175	0	0	0	0
	FBgn0031530	pgant2	3.88075	1.34275	0.814316	0.413181
	FBgn0031531	CG8840	0	0	0	0
	FBgn0051952	CG31952	0	0	0	0
	FBgn0031533	CG2772	12.4448	0.366586	0	0
	FBgn0031534	Snx1	23.2381	20.9862	18.8018	19.8313
	FBgn0031535	CG12795	25.2985	39.7401	33.2349	26.3058
	FBgn0031536	Cog3	9.73224	10.2368	8.95633	8.90521
	FBgn0031537	sec5	12.2837	13.2336	13.4314	11.5975
	FBgn0031538	CG3246	194.478	305.654	306.962	261.179
	FBgn0005616	msl-2	1.90961	2.40158	1.90296	2.2344
	FBgn0263526	mir-4971	0	0	0	0
	FBgn0021967	Pdsw	222.753	259.593	228.745	258.274
	FBgn0031540	CG3238	1.10355	1.49763	2.02696	1.77559
	FBgn0051776	CG31776	0.171552	0.0791608	0.0837693	0
	FBgn0051956	pgant4	17.337	1.20389	0.134005	1.51707
	FBgn0264549	CR43928	0	0	0	0.291761
	FBgn0261560	Thor	658.053	476.048	792.39	937.99
	FBgn0031542	CG15414	1.75221	1.84827	1.95881	1.05544
	FBgn0014396	tim	15.6306	9.65281	64.5419	42.9123
	FBgn0051954	CG31954	0.191305	0.353196	1.12581	0.202098
	FBgn0053123	CG33123	18.5876	20.0959	24.9628	25.4872
	FBgn0031544	CG17593	57.2597	67.5932	70.4746	56.0998
	FBgn0031545	CG3213	0	0.0642836	0.0679841	0
	FBgn0031546	CG8851	0	0	0	0
	FBgn0031547	Sr-CIV	6.82531	5.3663	3.21469	0.399719
	FBgn0031548	CG8852	3.38408	1.46588	4.11148	1.38065
	FBgn0031549	Spindly	1.62082	2.15386	2.84678	2.18257
	FBgn0031550	Che-13	0.117313	0.108274	0.114716	0
	FBgn0024244	drm	10.3474	5.71744	4.6762	2.20036
	FBgn0264370	CR43822	0	0	0	0.583113
	FBgn0264363	CG43815	0	0	0	0
	FBgn0004892	sob	1.51254	0.465268	0.307454	0.0662969
	FBgn0264371	CR43823	0	0	0	0
	FBgn0002985	odd	5.88312	2.28942	1.93706	1.04416
	FBgn0015663	Dot	5.88764	4.94582	5.158	5.00454
	FBgn0031554	CG15418	2.61389	0.804844	3.45303	0.463998
	FBgn0000721	for	129.057	153.631	144.093	141.724
	FBgn0263523	mir-4972	0	0	0	0
	FBgn0085369	CG34340	0	0.174404	0.245862	0.463887
	FBgn0259951	Sfp24Ba	0	0	0	0
	FBgn0259953	CG42463	0	0	0	0
	FBgn0259952	Sfp24Bb	0	0	0	0
	FBgn0261054	Sfp24Bc	0	0	0	0
	FBgn0031558	CG16704	360.371	498.116	616.973	556.506
	FBgn0031559	CG3513	6.20131	6.16182	1.85767	5.31747
	FBgn0051779	Acp24A4	0	0.307263	0.328248	0.353155
	FBgn0263096	CR43364	0	0	0	8.52624
	FBgn0262721	CG43165	2.53144	1.16997	3.79365	4.75039
	FBgn0031560	CG16713	997.819	968.754	1235.44	1319.51
	FBgn0031561	CG16712	3422	3608.21	3996.63	4964.69
	FBgn0031562	CG3604	52.9271	39.2258	1.66317	3.57862
	FBgn0031563	CG10031	122.697	155.109	200.524	161.025
	FBgn0259954	CG42464	0	0	1.23986	1.32503
	FBgn0259955	CG42465	0	0	0	0
	FBgn0259956	Sfp24C1	0	0	0.822118	0
	FBgn0259957	CG42467	0	0.839147	0.916329	0
	FBgn0262621	CG43145	0	0	0	0
	FBgn0031564	CG2816	4.19007	4.64436	5.39306	5.79827
	FBgn0051778	CG31778	44.3069	59.3778	65.7562	54.5587
	FBgn0051777	CG31777	178.048	176.265	260.237	205.141
	FBgn0015376	cutlet	1.75529	2.03629	2.24972	2.37306
	FBgn0051955	CG31955	26.4549	28.499	29.8679	26.5354
	FBgn0031566	CG2818	14.908	14.9722	14.4168	15.4426
	FBgn0040104	lectin-24A	0.384526	0.354966	0.942913	0.406234
	FBgn0003386	Shaw	0.613248	0.400401	0.285197	1.3602
	FBgn0031568	CG10019	0.0341785	0.252316	0.0800032	0.144792
	FBgn0263846	CG43707	0.144566	0.066706	0.282212	0.303214
	FBgn0263842	CG43703	0	0	0	0
	FBgn0262392	mir-1004	0	0	0	0
	FBgn0263843	CR43704	0	0	0	0
	FBgn0004893	bowl	11.308	5.81401	3.64961	2.87676
	FBgn0051960	CG31960	0	0	0	0
	FBgn0051958	CG31958	0	0	0	0
	FBgn0031571	CG3921	7.35113	3.4848	1.9649	1.27488
	FBgn0021800	l(2)k16918	3.94374	3.84143	5.21493	6.83079
	FBgn0031573	CG3407	1.91737	1.64303	2.47265	2.30555
	FBgn0003430	slp1	0.478767	0.441881	0.468212	1.00917
	FBgn0004567	slp2	0.140529	0	0.205732	0.51753
	FBgn0031574	CG3964	0.141727	0.130783	0.046051	0.248368
	FBgn0031575	Cep97	1.82259	2.06061	2.32318	3.25731
	FBgn0051957	CG31957	6.13586	5.9491	13.3028	8.13359
	FBgn0000256	capu	20.9154	19.9362	13.9194	16.3617
	FBgn0051774	fred	0.113864	0	0	0.033976
	FBgn0051773	CG31773	0	0	0	0
	FBgn0264341	CG43797	0.250263	0	0	0
	FBgn0085205	CG34176	63.2668	0.628948	15.6636	2.92274
	FBgn0031579	CG15422	53.4342	0.277191	3.25326	1.2731
	FBgn0031580	CG15423	77.8636	0	0.777861	0
	FBgn0264295	CG43773	12.606	1.16814	1.29057	0
	FBgn0264296	CG43774	38.0131	0	0	1.25213
	FBgn0000547	ed	4.20576	3.98364	5.86161	6.99458
	FBgn0086032	snoRNA:Me28S-C437	0	0	0	0
	FBgn0020376	Sr-CIII	0	0.179964	0.191239	0
	FBgn0014033	Sr-CI	9.42553	6.63836	16.1471	12.9678
	FBgn0031585	CG2955	0	0	0	0
	FBgn0026394	Or24a	0	0	0	0
	FBgn0051961	CG31961	6.15237	7.21574	5.96399	7.1252
	FBgn0040102	lectin-24Db	8.39465	4.73525	11.4188	15.255
	FBgn0031589	CG3714	60.5005	65.2075	55.3704	46.0334
	FBgn0001075	ft	0.156455	0.0679345	0.0985598	0.0483216
	FBgn0031590	CG3702	54.0215	50.8219	54.636	39.6123
	FBgn0003941	RpL40	2422.92	2879.46	2902.08	2873.22
	FBgn0031591	CG15425	0	0	0	0
	FBgn0031592	Art2	0	0	0	0.128357
	FBgn0010473	tutl	0.201369	0.114384	0.443872	1.93707
	FBgn0028482	CG16857	1.26777	1.0585	2.41475	2.79404
	FBgn0020762	Atet	20.1227	18.1818	18.2533	15.7454
	FBgn0262375	mir-1005	0	0	0	0
	FBgn0031596	CG15429	0	0	0	0
	FBgn0026319	Traf4	4.47643	3.32085	5.26824	3.82695
	FBgn0031597	CG17612	1.3918	1.28446	1.84708	1.53856
	FBgn0031598	CG3338	9.09523	9.20701	8.38747	7.94212
	FBgn0261976	Psf2	36.4026	45.3816	41.0557	32.708
	FBgn0027560	Tps1	2299.45	3043.32	2651.92	2323.18
	FBgn0031600	CG3652	23.0905	21.7269	23.7662	26.0615
	FBgn0022153	l(2)k05819	13.3927	14.3852	15.8179	12.6261
	FBgn0053003	CG33003	0	0	0.0840995	0.0906562
	FBgn0031601	Dim1	16.7649	15.1533	14.7943	19.3239
	FBgn0031602	CG15431	2.61633	0.432051	0.402519	0.549859
	FBgn0262357	CG43055	72.9185	0	0	0.381593
	FBgn0051963	tRNA:CR31963	0	0	0	0
	FBgn0085207	CG34178	0	0	0	0
	FBgn0085206	CG34177	0	0	0	0
	FBgn0262358	CG43056	0	0	0	0
	FBgn0259958	Sfp24F	0	0	0	0
	FBgn0031603	CG15432	12.9763	10.782	8.47974	9.42135
	FBgn0027609	morgue	5.07274	7.29258	4.19391	3.90405
	FBgn0031604	Elp3	9.27808	11.6687	14.1275	15.7072
	FBgn0025684	MFS18	11.2349	13.8248	10.0823	10.387
	FBgn0031606	CG15439	4.99943	5.29188	4.73178	4.43218
	FBgn0031607	CG15440	9.17135	8.46531	8.6936	8.29214
	FBgn0040705	CG15434	0	0.575513	0	0
	FBgn0019982	Gs1l	76.0613	86.5617	79.5233	73.0539
	FBgn0261606	RpL27A	3352.57	3892.14	4385.3	4499.15
	FBgn0065053	snoRNA:Me18S-C1831	0	0	0	0
	FBgn0053002	mRpL27	30.6672	26.6388	30.4124	33.1752
	FBgn0031608	CG15435	1.1974	1.19008	1.43962	1.26083
	FBgn0031609	CG15443	8.63272	14.3938	12.9463	10.8662
	FBgn0031610	CG15436	2.80377	1.99967	2.49348	2.01526
	FBgn0031611	CG17840	6.13354	5.82827	6.63565	6.45174
	FBgn0011603	ine	26.5827	20.4025	11.95	9.77224
	FBgn0053196	dp	2.35792	2.16256	1.67336	1.68483
	FBgn0031613	HP6	0	0	0	0
	FBgn0263869	CR43716	0	0	0	0
	FBgn0083938	BG642163	0	0	0	0
	FBgn0031617	CG15635	0	0	0.0445856	0
	FBgn0264342	CG43798	0	0	0	0
	FBgn0031619	CG3355	0	0	0	0
	FBgn0031620	CG11929	0	0	0	0
	FBgn0000227	Bsg25A	0	0	0	0
	FBgn0031621	CG15634	0	0	0	0
	FBgn0031622	CG3251	0	0	0	0
	FBgn0085380	CG34351	0.10073	0.13943	0	0.10592
	FBgn0031623	Taf12L	0.296138	0	0	0
	FBgn0031626	CG15631	0.0843617	0	0	0
	FBgn0031627	CG15630	0.492648	0.397797	0.300405	0.51822
	FBgn0260428	CG42523	0	0	0	0.383404
	FBgn0031628	CG3294	1.00043	0.667838	1.35372	2.56448
	FBgn0031629	Clect27	17.8457	24.396	18.6017	24.3005
	FBgn0031630	CG15629	3.42073	2.3679	4.66002	4.12055
	FBgn0031631	CG3225	0.485845	0.320255	0.677375	0.584225
	FBgn0263577	mir-4910	0	0	0	0
	FBgn0031632	CG15628	0.319621	0.463479	2.71567	1.10412
	FBgn0031633	CG2976	50.9923	36.8908	30.7415	21.1651
	FBgn0263575	mir-4912	0	0	0	0
	FBgn0031634	Ir25a	0.21706	0.0507179	0.160911	0.173496
	FBgn0031635	CG15626	30.8805	36.9735	37.0415	30.8563
	FBgn0031636	CG12194	5.33645	4.64469	1.80035	3.33696
	FBgn0031637	CG2950	46.9327	40.9607	36.7898	33.3167
	FBgn0031638	CG11927	4.92459	4.09044	5.29305	7.46859
	FBgn0031639	mRpS2	19.0753	25.7515	18.3174	23.1956
	FBgn0031640	CG11926	12.233	12.1198	11.246	11.1753
	FBgn0051660	pog	0.0899452	0.102968	0.0438848	0.520255
	FBgn0000286	Cf2	17.1853	18.8833	16.0615	14.9339
	FBgn0031643	CG3008	28.4874	32.0461	24.7582	20.4201
	FBgn0031644	CG15625	0.133776	0.370422	0.261804	0.564221
	FBgn0031645	CG3036	164.284	199.827	164.614	178.243
	FBgn0031646	CG2837	1.88136	1.86325	2.69385	3.09557
	FBgn0041150	hoe1	10.4116	12.7941	4.30096	8.40379
	FBgn0031649	hoe2	0.251361	0.574404	0.429194	0.297572
	FBgn0003372	Sgs1	0	0.0750269	0.0396291	0
	FBgn0031650	CG14044	0	0.12467	0.132176	0
	FBgn0031651	mRpL24	31.5396	38.0606	28.7649	29.5443
	FBgn0015000	betaggt-I	21.3991	16.2208	17.7115	10.5644
	FBgn0031652	jet	12.614	11.5532	10.6508	8.54783
	FBgn0031653	Jon25Biii	59.5163	0.65674	3.96108	115.151
	FBgn0031654	Jon25Bii	3.25042	1.00024	0.212759	0.687337
	FBgn0020906	Jon25Bi	22.9016	0.615805	0.655072	1.88105
	FBgn0031655	Marcal1	1.57921	2.91471	3.81946	2.02278
	FBgn0083960	CG34124	0	0.0467519	0.0246799	0
	FBgn0264372	CR43824	0	0.23179	0.245657	0
	FBgn0083961	CG34125	24.9423	25.335	29.502	26.7855
	FBgn0015834	Trip1	211.224	236.422	218.109	230.947
	FBgn0262467	Scox	20.2208	16.3734	16.1703	16.1075
	FBgn0031657	CG3756	8.48055	7.10311	9.38297	9.28032
	FBgn0010607	l(2)05714	9.57113	8.7528	6.58736	9.47797
	FBgn0031659	CG14043	12.1237	11.2669	11.7568	11.1563
	FBgn0031660	mRpL28	53.4577	57.2651	58.0869	61.7418
	FBgn0031661	Gmd	15.4001	10.7367	12.4557	10.7394
	FBgn0031662	CG3792	27.8839	32.972	26.123	31.9618
	FBgn0031663	CG8891	23.5417	21.019	22.3906	22.1863
	FBgn0031664	CG8892	6.0459	6.19974	6.8445	6.56906
	FBgn0083962	CG34126	16.5956	19.3994	19.5472	18.4599
	FBgn0053113	Rtnl1	433.425	442.927	351.316	332.543
	FBgn0259719	Tfb5	21.7531	23.2537	21.5937	19.8604
	FBgn0031670	CG3887	53.6206	60.8808	61.4464	51.0713
	FBgn0016075	vkg	86.2027	86.3183	132.86	148.03
	FBgn0000299	Cg25C	144.914	165.698	234.631	262.784
	FBgn0260470	SP555	0.251546	0	0.370798	0.465035
	FBgn0053995	CG33995	20.6922	18.6127	21.3143	20.5965
	FBgn0031674	CG31919	14.9509	12.7165	13.4245	12.1028
	FBgn0031673	CG31650	7.18696	6.98043	7.16946	7.40779
	FBgn0031675	CG9121	6.16564	5.90073	5.20023	6.24847
	FBgn0022023	eIF-3p40	257.761	290.433	287.157	293.034
	FBgn0031676	CG14040	8.26836	7.6311	9.86637	8.25819
	FBgn0031677	CG14036	2.33927	5.4048	2.33234	13.1474
	FBgn0014857	His3.3A	125.36	110.029	133.913	108.461
	FBgn0031678	CG31918	1.02745	1.89636	0.501452	0.926744
	FBgn0028694	Rpn11	82.3685	102.652	99.7181	87.05
	FBgn0028572	qtc	18.2481	12.777	11.9996	10.5058
	FBgn0262213	mir-2495	0	0	0	0
	FBgn0264368	CR43820	10.9407	4.04038	5.01836	5.40297
	FBgn0261608	RpL37A	1741.59	1876.58	1987.98	2099.84
	FBgn0031681	pgant5	12.5546	10.8278	9.89978	12.4109
	FBgn0031682	CG5828	18.9953	19.9085	14.0249	11.4957
	FBgn0031683	CG4230	14.0629	10.8793	11.9012	11.385
	FBgn0031684	CG8680	143.356	148.582	134.082	131.296
	FBgn0261836	Msp-300	15.9311	13.2426	12.5563	11.8998
	FBgn0065083	snmRNA:765	0	0	0	0
	FBgn0065107	snmRNA:128	0	0	0	0
	FBgn0065104	snmRNA:158	5.99624e-36	13.6269	3.50151e-151	0
	FBgn0082990	snoRNA:Psi28S-2263	0	0	0	0
	FBgn0083028	snoRNA:Psi18S-525k	0	0	0	0
	FBgn0031688	Cyp28d2	0.92254	0.567618	0.200349	0.539854
	FBgn0031689	Cyp28d1	41.4523	46.912	48.2243	31.5447
	FBgn0031690	CG7742	0	0.177915	0.0941742	0
	FBgn0250847	CG14034	0	0	0	0
	FBgn0031692	TpnC25D	13.3809	8.1372	21.5661	22.511
	FBgn0046776	CR14033	2.26155	1.04364	1.10555	4.05108
	FBgn0003716	tkv	22.4891	16.8941	16.9076	16.9298
	FBgn0051971	tRNA:CR31971	0	0	0	0
	FBgn0051914	tRNA:CR31914	0	0	0	0
	FBgn0031693	Cyp4ac1	17.6106	17.8214	14.7951	13.1803
	FBgn0031694	Cyp4ac2	10.4602	10.6238	8.99878	3.63724
	FBgn0031695	Cyp4ac3	10.3313	10.1875	21.899	7.33273
	FBgn0000228	Bsg25D	7.52673	7.70154	6.07665	7.54936
	FBgn0031696	Bub1	5.19146	4.55687	3.16828	3.23898
	FBgn0016076	vri	17.323	17.1238	38.3557	28.4771
	FBgn0031697	CG14024	0.063152	0.175706	0.0616177	0.201109
	FBgn0031698	Ncoa6	5.69108	4.95125	4.51738	5.68082
	FBgn0015031	cype	738.192	896.136	801.142	809.255
	FBgn0031700	CG14022	8.37856	10.4152	10.4865	8.54784
	FBgn0031701	TotM	94.7255	192.379	127.552	87.3154
	FBgn0031702	fusl	33.2812	38.2683	23.7669	23.4176
	FBgn0031703	CG12512	14.2445	12.5772	12.2526	14.7484
	FBgn0016920	nompC	0.202504	0.164353	0.150579	0.159383
	FBgn0262097	CG42850	0	0	0	0
	FBgn0016660	H15	0.838574	0.297638	1.13296	1.08577
	FBgn0263866	CR43713	0	0	0	0
	FBgn0263867	CR43714	0	0	0	0
	FBgn0263868	CR43715	0	0	0	0
	FBgn0051647	CR31647	0	0	0	0
	FBgn0086033	snoRNA:Me28S-A2486	0	0	0	0
	FBgn0261963	mid	0.546907	0.288867	0.229829	0.576387
	FBgn0031707	CG14020	0.664248	0.367856	0.129991	0.420223
	FBgn0031708	CG7382	30.0311	30.135	27.1363	27.1511
	FBgn0000318	cl	146.941	111.952	104.158	97.8867
	FBgn0031710	CG7371	10.8999	10.4902	11.2496	9.17751
	FBgn0031711	CG6907	15.4989	17.4302	17.9553	16.866
	FBgn0051989	Cap-D3	2.06139	1.47201	2.23798	2.54082
	FBgn0031715	tomb	0	0.214601	0	0
	FBgn0031716	CG14015	0	0	0	0.163801
	FBgn0051648	CG31648	10.4848	9.28425	13.2341	8.82247
	FBgn0051915	CG31915	7.84621	10.5594	12.5053	12.1754
	FBgn0031713	CG7277	21.7062	24.4961	23.5279	20.6034
	FBgn0014189	Hel25E	50.2151	42.1135	38.7963	50.4134
	FBgn0002525	Lam	7.38448	7.10232	7.30324	9.62806
	FBgn0031717	Oscillin	39.6336	34.9716	28.7065	28.15
	FBgn0031718	CG14014	0	0	0	0
	FBgn0031719	CG18269	0	0	0	0
	FBgn0031720	CG14013	0	0	0	0
	FBgn0031721	CG14017	0	0	0	0
	FBgn0004620	GluRIIA	2.84467	1.75003	2.53073	2.67633
	FBgn0020429	GluRIIB	0	0.102139	0.0539796	0.232808
	FBgn0041719	snRNA:U4:25F	0	0	0	0
	FBgn0031722	CG14011	0	0	0	0
	FBgn0031723	CG7251	0	0	0	0
	FBgn0031724	CG18266	0	0	0	0
	FBgn0031725	CG14010	0.143799	0	0	0.117327
	FBgn0031726	Cyp6a16Psi	5.55719	5.80933	1.55237	0.239006
	FBgn0051646	CG31646	0	0	0	0.0598228
	FBgn0262256	mir-959	0	0	0	0
	FBgn0262321	mir-960	0	0	0	0
	FBgn0262239	mir-961	0	0	0	0
	FBgn0262200	mir-962	0	0	0	0
	FBgn0262333	mir-963	0	0	0	0
	FBgn0262243	mir-964	0	0	0	0
	FBgn0031728	Hsp60C	0	0.0764055	0	0
	FBgn0031729	CG12511	0	0	0	0
	FBgn0031730	CG7236	0.234613	0.108261	0.344134	0.123617
	FBgn0031731	CG14007	0	0	0	0
	FBgn0054011	CG34011	0	0	0	0
	FBgn0031732	CG11149	8.89859	0.986861	0.849095	0.0937938
	FBgn0024191	sip1	2.50444	2.36893	1.52721	2.17349
	FBgn0031736	CG11030	8.88164	7.67392	9.23105	8.45769
	FBgn0031733	CG14006	0	0	0	0
	FBgn0031734	CG11147	24.6213	25.4751	40.8837	29.0698
	FBgn0031735	CG11029	2.82599	1.56486	0.0920273	0.099196
	FBgn0031737	obst-E	17.9609	21.9446	14.4904	13.6369
	FBgn0031738	CG9171	8.0134	5.67253	2.99941	2.66688
	FBgn0051912	CR31912	6.99316	6.36186	3.61198	2.20964
	FBgn0051913	CG31913	0	0	0.219319	0
	FBgn0031739	CG14005	3.27012	2.781	2.46063	4.11004
	FBgn0031740	CG7239	5.74466	3.50456	2.47348	3.1788
	FBgn0031741	CG11034	14.3955	3.27211	5.12174	2.98471
	FBgn0262999	CG43307	0	0	0	0
	FBgn0051644	CG31644	0	0	0	0
	FBgn0085410	TrissinR	0.81535	0.913553	0.62484	0.796214
	FBgn0031745	CG8965	3.40341	2.1637	1.69812	2.7062
	FBgn0259959	Sfp26Ac	0	0	0	0
	FBgn0262814	CG43185	0	0	0	0
	FBgn0031746	CG9029	0	0	0	0
	FBgn0002856	Acp26Ab	0	0	0	0
	FBgn0002855	Acp26Aa	0	0	0	0
	FBgn0031747	CG9021	0.151917	0.420673	0	0
	FBgn0264352	CR43808	0	0	0	0
	FBgn0043362	bchs	3.1517	3.19181	2.33282	1.93755
	FBgn0031749	CG14000	0	0.119313	0	0.136283
	FBgn0031751	CG9016	0	0	0	0
	FBgn0264547	CR43926	0	0	0	0
	FBgn0015381	dsf	0	0	0	0
	FBgn0261055	Sfp26Ad	0	0	0	0
	FBgn0001128	Gpdh	927.175	875.081	1059.32	964.085
	FBgn0031752	CG9044	38.7402	37.9514	37.2381	37.1359
	FBgn0031753	CG13999	0	0	0	0.187297
	FBgn0040949	CG13998	0	0	0	1.06374
	FBgn0003980	Vm26Ab	1.02485	6.30954	10.1142	282.902
	FBgn0086266	Vm26Ac	0	0.628155	0.671249	0
	FBgn0003979	Vm26Aa	1.97921	14.6217	22.7772	439.708
	FBgn0086265	psd	0.144748	0.400824	0.70853	15.1587
	FBgn0031756	CG13992	0.503138	0	0	4.84282
	FBgn0031757	Ucp4C	0	0	0	0
	FBgn0263442	CR43465	0	0	0	0
	FBgn0031758	Ucp4B	0.168607	0	0.333983	0
	FBgn0000308	chic	224.596	135.671	147.15	136.425
	FBgn0001942	eIF-4a	1251.54	1306.34	1361.01	1376.58
	FBgn0001941	ifc	69.039	31.0341	26.1631	20.6302
	FBgn0031759	lid	11.5389	12.0585	9.62176	10.4662
	FBgn0031760	Tsp26A	2.79732	2.83953	0.491128	0.588382
	FBgn0264448	CR43866	7.41313	2.82213	1.08626	0.780592
	FBgn0001089	Gal	10.8274	2.15462	1.24295	1.56335
	FBgn0031762	CG9098	0.46573	0.214787	0	0.400325
	FBgn0001170	H2.0	0	0.0954318	0.101056	0.10892
	FBgn0031763	CG13996	0	0	0	0
	FBgn0031764	CG9107	6.32661	5.65073	6.40496	6.89339
	FBgn0031765	CG9109	0	0	0	0
	FBgn0025742	mtm	14.3738	13.191	11.8391	12.7627
	FBgn0031766	CG9117	1.8915	3.88037	3.3007	1.55513
	FBgn0051643	CG31643	4.00873	4.37663	3.91028	3.50353
	FBgn0000052	ade2	66.105	91.6064	69.6091	67.1104
	FBgn0262317	mir-966	0	0	0	0
	FBgn0029161	slmo	93.4393	93.5599	91.8496	84.4378
	FBgn0085208	CG34179	0.803459	2.4116e-10	0.196158	0.422008
	FBgn0031768	CG12393	11.1988	10.8999	10.9506	12.0348
	FBgn0031769	CG9135	5.56514	4.83859	4.54497	5.85974
	FBgn0031770	CG13995	0.0959745	0.132846	0.0467925	0.151367
	FBgn0085209	CG34180	1.51368	0	0	0
	FBgn0031771	CG9140	172.075	193.745	173.004	162.343
	FBgn0031772	CG13994	10.6762	16.7614	15.4623	9.45029
	FBgn0031773	Fbw5	6.634	7.33315	6.54655	6.44397
	FBgn0031774	CG9147	6.4049	7.08792	6.3424	5.16038
	FBgn0031775	CG9150	0.417474	0.192699	0	0
	FBgn0031776	CG13993	35.5075	30.0882	31.0998	31.5059
	FBgn0031777	CG9154	9.67186	9.17812	6.34429	7.68278
	FBgn0028419	Kr-h2	80.4146	67.8194	99.1834	77.8374
	FBgn0264345	CR43801	0	1.14854	0	1.76455
	FBgn0031778	CR9162	0.433034	0.799393	0.565218	0.609008
	FBgn0028420	Kr-h1	57.9817	16.4159	25.533	25.5195
	FBgn0031779	CG9175	10.7306	9.90285	10.8712	9.51129
	FBgn0051641	stai	4.92413	3.38333	3.63846	11.251
	FBgn0051642	CG31642	0.0865013	0	0.16896	0.182132
	FBgn0031781	Arc-p20	46.9364	34.0894	31.8435	26.0834
	FBgn0031782	WDR79	3.98147	3.37667	2.73476	4.76132
	FBgn0261683	CG42730	0	0	0	0
	FBgn0031784	CG9222	0	0	0	0
	FBgn0031785	CG13991	0	0	0	0
	FBgn0040950	Muc26B	0	0	0	0
	FBgn0051639	CG31639	0	0	0	0
	FBgn0031786	CG13989	0	0	0	0
	FBgn0085409	CG34380	0.575897	0.318901	0.252504	0.394727
	FBgn0026755	Ugt37b1	1.86655	0.997326	0	0
	FBgn0053531	Ddr	0.0900346	0.0921766	0	0.208894
	FBgn0031791	CG9486	2.70339	0.623945	6.85933	2.14434
	FBgn0031792	CG13983	0	0	0	0
	FBgn0261699	CR42735	0	0	0	0
	FBgn0264543	CG43922	0	0	0	0
	FBgn0260452	CG13984	0	0	0	0
	FBgn0021873	Gef26	6.47856	6.29255	5.51178	6.35755
	FBgn0031799	Pez	7.31644	5.55992	5.03348	6.06885
	FBgn0015623	Cpr	1584.84	2388.6	3776.25	2206.73
	FBgn0031800	CG9497	10.7264	11.3785	5.7614	5.23493
	FBgn0031801	CG9498	132	110.08	58.3086	47.6139
	FBgn0031802	ppk7	0.0992562	0	0	0.104538
	FBgn0031803	ppk14	0	0	0	0
	FBgn0031804	CG9500	0	0	0.468936	0
	FBgn0031805	CG9505	22.3432	36.3988	20.6862	17.6143
	FBgn0043854	slam	1.01866	1.59075	0.916566	1.35903
	FBgn0259714	CG42368	4.66924	4.93114	6.47639	4.25537
	FBgn0031808	CG9507	5.96772	4.79212	7.41508	5.62824
	FBgn0259716	CG42370	44.272	55.6359	69.7462	51.8357
	FBgn0259715	CG42369	277.304	377.779	327.915	310.251
	FBgn0031811	CG13982	0.371873	0.686345	0.544232	0.912757
	FBgn0011722	Tig	41.1704	47.0781	64.1799	63.7337
	FBgn0263278	l(2)k11101	13.47	16.4125	18.9173	12.7913
	FBgn0031813	CG9527	74.3216	66.474	84.9579	66.6021
	FBgn0031814	retm	51.1865	60.6982	48.5977	48.2504
	FBgn0031815	frj	52.229	62.0821	54.4633	49.8062
	FBgn0031816	CG16947	1.34473	0.965195	0.510445	0.707533
	FBgn0031817	CG9531	2.19656	2.57009	3.87385	3.55555
	FBgn0259749	mmy	62.4381	41.5652	30.3546	22.5483
	FBgn0031818	CG9536	23.6657	22.2793	20.2955	19.6794
	FBgn0086357	Sec61alpha	144.244	136.609	162.289	190.702
	FBgn0031820	DLP	7.25113	7.17801	6.49637	7.96936
	FBgn0031821	CG9542	3.15771	3.08638	6.55716	2.74668
	FBgn0027496	epsilonCOP	40.177	39.0699	38.2305	37.5208
	FBgn0031822	CG9548	12.4291	12.9197	10.2977	13.2752
	FBgn0051638	CG31638	4.37578	3.48255	2.1195	3.48092
	FBgn0031824	CG9547	31.4913	28.8408	23.4266	21.4015
	FBgn0031826	CG9550	0	0	0	0
	FBgn0051637	CG31637	13.6831	8.83329	8.68032	7.61619
	FBgn0000320	eya	0.404446	0.0533136	0.11272	1.33692
	FBgn0031829	osm-6	0	0	0.142111	0
	FBgn0031830	CoVb	285.587	336.047	327.925	328.863
	FBgn0031831	CG11043	0.325671	0.902213	0.64238	0.345581
	FBgn0031832	CG9596	6.40343	6.12896	9.277	8.49808
	FBgn0263916	Ent2	37.9	38.3999	52.2802	50.9265
	FBgn0031834	CG13766	3.51998	2.21169	2.92435	3.15262
	FBgn0031835	CG11319	0.652757	0.285317	0.602672	1.01099
	FBgn0031836	CG11050	91.6789	72.5222	75.0227	61.676
	FBgn0031837	CG11320	0.399934	0	0.260889	0.421689
	FBgn0085374	CG34345	0	0	0	0
	FBgn0051634	Oatp26F	0	0	0	0
	FBgn0051635	CG31635	12.9432	11.8717	12.1923	14.2891
	FBgn0031842	Tango1	34.9285	34.9116	48.3015	36.9774
	FBgn0051633	CG31633	7.33552	6.65938	7.29157	6.21033
	FBgn0051636	CG31636	1.37245	0.253354	0	0
	FBgn0028467	CG11070	14.3232	17.9598	15.5904	16.1105
	FBgn0031844	CG13771	0	0	0.119776	0
	FBgn0000392	cup	2.61737	4.0581	2.55788	11.233
	FBgn0085339	CG34310	28.0021	23.3474	17.8374	27.1745
	FBgn0000351	cort	0.543731	0.401457	0.318896	2.17688
	FBgn0263200	Galt	199.356	267.902	244.666	210.326
	FBgn0028990	Spn27A	46.4856	59.9828	52.1187	52.9081
	FBgn0031848	CG11329	0.431547	0.398392	0.635543	0.912539
	FBgn0028703	Nhe3	16.8084	14.0263	12.2984	13.4695
	FBgn0031849	CG11327	0.0940266	0	0	0
	FBgn0031850	Tsp	4.77011	6.00474	6.78514	5.47109
	FBgn0025595	GRHR	175.999	214.803	210.775	189.636
	FBgn0031851	CG11188	8.44124	6.30661	9.91807	12.7011
	FBgn0025777	homer	10.7446	7.97727	7.48272	9.28065
	FBgn0046704	Liprin-alpha	8.36749	5.91022	4.60634	6.56908
	FBgn0031853	TTLL3B	0	0.0498469	0	0.113613
	FBgn0031854	TTLL3A	0.054749	0	0.0534006	0
	FBgn0031855	CG11221	0.659871	0.608961	0.572539	0.925857
	FBgn0051910	CG31910	0	0	0	0
	FBgn0086034	snoRNA:Me28S-G2743	0	0	0	0
	FBgn0031856	CG11322	0	0	0	0
	FBgn0031857	CG11321	3.36519	2.82525	4.8176	5.07143
	FBgn0031858	CG17378	0.0872338	0.143707	0.101169	0
	FBgn0015776	nrv1	117.076	105.418	66.1034	56.9567
	FBgn0015777	nrv2	12.0072	13.3998	10.8313	15.5287
	FBgn0263585	CR43610	0	0	0	0
	FBgn0051631	tRNA:CR31631	0	0	0	0
	FBgn0042189	CG17376	0	0.502229	0.540948	0
	FBgn0031859	CG17377	0	0	0	0
	FBgn0031860	CG11236	80.1533	96.278	108.094	99.8701
	FBgn0031861	CG17375	0	0	0	0
	FBgn0051632	sens-2	0.864581	0.177295	1.07724	0.202012
	FBgn0017551	Rca1	2.56302	2.15981	1.41625	3.28756
	FBgn0086451	l(2)k09022	6.05768	6.17564	6.87681	8.34037
	FBgn0031865	Nha1	33.2258	11.0611	0.382645	2.88879
	FBgn0031866	neuroligin	0.11785	0.0923137	0.0974925	0.281276
	FBgn0262205	mir-932	0	0	0	0
	FBgn0042092	CG13773	5.59475	4.85137	3.98731	7.33795
	FBgn0031868	Rat1	8.55245	9.20824	9.09111	9.91751
	FBgn0011737	wee	4.41786	3.6301	4.44602	4.43061
	FBgn0028554	x16	5.51256	4.93223	4.30941	6.67895
	FBgn0052829	CG32829	0	0.205566	0.218677	0.706424
	FBgn0026196	nop5	34.4961	29.414	38.5535	61.0026
	FBgn0263467	snoRNA:nop5-x16-a	0	0	0	0
	FBgn0004838	Hrb27C	148.01	128.676	130.308	151.418
	FBgn0262877	CG43232	0	0	0	0
	FBgn0031869	CG18304	1.18044	1.64549	2.03097	2.12483
	FBgn0031871	CG10158	9.4876	9.18805	8.47451	9.50393
	FBgn0031872	ihog	1.08909	1.69024	1.20687	1.50954
	FBgn0031873	Gas41	6.2383	9.17222	5.90161	6.84333
	FBgn0020616	SA	6.37391	4.15422	3.99805	5.06091
	FBgn0031874	CG13775	0.647086	1.36501	1.26424	1.65475
	FBgn0031875	CG3430	1.96626	1.10455	1.92023	2.60994
	FBgn0031876	Atac1	3.64241	4.62283	4.7557	4.64349
	FBgn0031877	CG10399	12.0406	15.4014	12.1374	9.07984
	FBgn0031878	sip2	0.332841	0.658695	0.243742	1.419
	FBgn0021944	Coprox	18.6756	16.7712	17.0344	14.7652
	FBgn0026170	smt3	105.427	109.416	98.5051	119.214
	FBgn0016978	snRNP-U1-70K	9.98899	7.17377	5.86621	9.54203
	FBgn0262616	CR43142	0	0	0	0
	FBgn0031879	uif	2.79535	2.44516	3.85466	2.59239
	FBgn0263026	CG43321	0	0	0	0
	FBgn0263027	CG43322	1.54	2.45518	2.46648	1.77177
	FBgn0000053	ade3	98.2312	101.081	93.9544	108.078
	FBgn0003046	Pcp	2.25179	10.9155	2.21677	0
	FBgn0051908	CG31908	21.9154	20.3507	20.4879	21.7178
	FBgn0031881	CG3476	10.7298	7.7817	9.30677	6.30737
	FBgn0031882	Rab30	7.56167	5.01463	4.59006	6.25295
	FBgn0031883	CG11266	67.805	59.5401	72.6335	71.091
	FBgn0262872	milt	35.5995	27.2421	20.0511	23.2127
	FBgn0031885	Mnn1	7.11189	7.25263	7.30809	9.20947
	FBgn0051907	CG31907	0.237164	0.109446	0.347887	0
	FBgn0040954	CG13779	171.496	169.227	202.241	149.75
	FBgn0031886	Nuf2	0.137738	0.63566	0.943604	0.290504
	FBgn0031887	CG11289	0.803382	0.211851	0	0
	FBgn0031888	Pvf2	2.11886	0.827297	0.636594	0.257344
	FBgn0085407	Pvf3	0.511139	0.319388	0.405322	0.773742
	FBgn0031893	CG4495	19.2227	15.5538	14.059	16.9089
	FBgn0031894	CG4496	0.223263	0.137359	0.435878	0.234952
	FBgn0031895	CG4497	2.10567	2.59089	2.17908	2.48363
	FBgn0031896	CG4502	11.334	11.993	11.7769	15.1619
	FBgn0031897	CG13784	78.7449	82.2807	76.208	63.5687
	FBgn0263133	ico	9.16663	8.88526	8.55883	9.01942
	FBgn0259111	Ndae1	82.461	57.4542	51.835	48.5962
	FBgn0264343	CG43799	1.81023	0.417804	0.222256	0.717966
	FBgn0264344	CG43800	12.0862	6.45818	4.85457	5.00664
	FBgn0031900	CG13786	0	0	0	0
	FBgn0010453	Wnt4	0.438884	0.269999	0	0.153824
	FBgn0051909	CG31909	4.42851	2.24251	0.200179	1.50684
	FBgn0004009	wg	0.671847	0.103331	0.109222	0
	FBgn0031902	Wnt6	1.92777	0.889573	0.753394	0.507542
	FBgn0031903	Wnt10	0	0	0	0
	FBgn0002938	ninaC	0	0	0	0
	FBgn0031904	CG5149	11.529	6.76341	7.43803	9.88026
	FBgn0031905	CG5155	0	0	0	0.0788926
	FBgn0031906	CG5160	0.769473	0.142038	0	0.324744
	FBgn0031907	CG5171	184.536	225.982	162.005	178.18
	FBgn0031908	CG5177	19.6406	26.9914	41.4151	27.7762
	FBgn0031909	CG5181	6.20845	5.73054	4.48655	3.58653
	FBgn0031910	CG15818	51.8617	13.1111	4.58961	2.40215
	FBgn0028387	chm	2.42978	2.64992	2.80059	2.78765
	FBgn0264439	CR43857	0	0.250891	0	0
	FBgn0262453	mir-275	0	0	0	0
	FBgn0262458	mir-305	0	0	0	0
	FBgn0031912	CG5261	130.768	159.577	148.482	133.799
	FBgn0031913	CG5958	212.012	248.911	266.647	213.476
	FBgn0031914	CG5973	73.5511	82.0944	119.422	91.9702
	FBgn0025697	santa-maria	26.9616	41.2619	29.4628	27.1125
	FBgn0041247	Gr28a	0	0	0.125829	0
	FBgn0045495	Gr28b	0.440952	0	0.112751	0.227691
	FBgn0031918	CG6055	3.20001	4.66396	0.876486	2.84463
	FBgn0260486	CG42533	5.12259	5.45866	4.76054	5.15669
	FBgn0031920	CG6441	0.592466	0.455658	0.675396	0.103993
	FBgn0011283	Pbprp5	0	0	0	0
	FBgn0085403	Rapgap1	5.98976	3.12466	5.97298	6.86208
	FBgn0031923	CG13791	1.0056	5.58568	3.06032	3.27536
	FBgn0083141	Spn7	0	0	0	0
	FBgn0031925	Cyp4d21	0	0.171973	1.72934	0
	FBgn0031926	CG6739	0.606321	0.279762	0.532377	1.148
	FBgn0264087	Slob	1.19552	1.12708	1.13114	0.556863
	FBgn0040299	Myo28B1	27.4121	0.314536	1.18827	0.454648
	FBgn0031929	CG18585	10.2903	0.480897	0	0.137328
	FBgn0031930	CG7025	2.3526	0	0.127876	0.137798
	FBgn0262880	CG43235	0	0.282162	0.301117	0.324035
	FBgn0041182	TepII	90.4027	108.107	114.491	110.168
	FBgn0041181	TepIII	5.16182	4.04862	4.58996	4.0684
	FBgn0031934	Ntl	0.176353	0.0813636	0.258381	0.18567
	FBgn0012018	tRNA:Y1:28C	0	0	0	0
	FBgn0053296	CG33296	29.6626	34.0319	62.2629	49.3633
	FBgn0031935	CG13793	20.3087	24.3976	35.3951	28.0167
	FBgn0031936	CG13794	51.8975	65.3005	67.9477	59.9532
	FBgn0031937	CG13795	51.7486	60.5211	62.5388	63.7176
	FBgn0031939	CG13796	15.3563	13.3055	23.3396	21.5421
	FBgn0260479	CG31904	5.06268	3.75708	7.64393	6.71218
	FBgn0014454	Acp1	0	0	0.108073	2.09478
	FBgn0031940	CG7214	0.527856	0.162419	3.27691	3.34413
	FBgn0031941	CG7211	0	0.467465	0	0
	FBgn0031942	CG7203	3.49963	1.88499	3.73386	35.239
	FBgn0031944	CG7196	0	0	0	0.178576
	FBgn0031943	CG14538	0	0	0	0
	FBgn0031945	CG7191	1.48567	0	0.103722	0.223583
	FBgn0020880	CG7179	1.57353	0.691491	0	0.078854
	FBgn0003961	Uro	589.455	460.087	82.8389	4.17237
	FBgn0031946	CG7164	0.517765	0.159313	0.169148	0
	FBgn0031947	CG7154	4.8316	4.24634	4.37648	5.02123
	FBgn0031948	CG7149	16.1887	11.1738	8.81283	9.85324
	FBgn0025687	LKR	44.675	27.7082	17.84	18.4
	FBgn0031950	Herp	42.2975	37.9726	30.3621	28.8393
	FBgn0031951	r2d2	15.2113	14.3952	15.1918	16.9968
	FBgn0031952	cdc14	9.1092	9.01412	7.3684	7.91997
	FBgn0261800	LanB1	6.04607	2.58411	3.17216	8.93556
	FBgn0027515	CG7115	15.7854	11.4251	13.3094	12.764
	FBgn0020618	Rack1	2289.52	2557.62	2714.61	2917.43
	FBgn0004177	mts	122.853	105.258	105.211	102.935
	FBgn0262546	CG43100	0	0	0	0
	FBgn0031954	CG14537	0	0	0	0
	FBgn0031955	CG14535	0	0.0260795	0.0550746	0.207883
	FBgn0040099	lectin-28C	175.647	185.581	72.1273	120.944
	FBgn0031957	TwdlE	8.79435	9.44969	4.4949	7.88822
	FBgn0045038	Proct	0.170126	0	0.415352	5.28332
	FBgn0011861	tRNA:G3:28D	0	0	0	0
	FBgn0031959	spz3	1.03426	0.715836	0.567674	0.408023
	FBgn0031961	CG7102	0.245135	0.150818	0.0797867	0.258031
	FBgn0261790	SmE	27.9641	31.1802	28.7176	40.1176
	FBgn0083968	CG34132	34.6004	37.8793	46.115	47.3025
	FBgn0051902	Spn28Da	0	0	0	0
	FBgn0053121	Spn28Db	0	0	0	0
	FBgn0085450	Snoo	7.14963	7.89292	5.81327	5.21183
	FBgn0031968	CG7231	23.9481	26.9775	35.299	20.8676
	FBgn0031969	pes	27.9009	12.9903	15.2595	14.1946
	FBgn0031970	CG7227	4.48101	5.44125	9.13357	6.53657
	FBgn0031971	CG7224	22.8451	32.3495	29.3074	44.2615
	FBgn0031972	Wwox	7.71201	8.26914	8.09448	6.33365
	FBgn0031973	Spn28D	20.6267	30.4751	24.8482	23.3753
	FBgn0031974	CG12560	5.5617	5.04562	11.2865	11.7511
	FBgn0054010	CG34010	1.57236	1.24423	0.661845	0
	FBgn0031975	Tg	6.55158	7.80036	5.85662	7.58907
	FBgn0031976	CG7367	0.720397	0.77568	0.234834	0.297202
	FBgn0044323	Cka	21.123	21.1312	18.3867	20.4594
	FBgn0031977	baf	58.3562	56.8526	58.3176	50.6386
	FBgn0031979	CG7429	6.72494	8.5757	10.42	6.11551
	FBgn0031980	RpL36A	3396.42	3728.69	4204.84	4218.45
	FBgn0065055	snoRNA:Psi28S-2648	0	0	0	0
	FBgn0031981	CG7466	2.91876	3.13029	3.35199	3.17795
	FBgn0011230	poe	23.1333	24.5792	24.0134	27.9128
	FBgn0013531	MED20	4.09859	2.79641	4.36719	5.08063
	FBgn0010287	Trf	1.52096	2.45705	2.61049	2.41006
	FBgn0020240	Mcr	6.54501	6.5021	6.64485	6.21782
	FBgn0261822	Bsg	170.652	144.706	114.137	103.047
	FBgn0031985	mon2	13.2691	10.7827	10.1082	9.35216
	FBgn0031986	CG8673	0	0	0	0.131715
	FBgn0031987	CG12375	38.2407	42.7061	48.7072	40.0208
	FBgn0031988	CG8668	9.92647	9.58141	9.07076	9.00016
	FBgn0031990	CG8552	31.058	24.0763	31.9693	29.0587
	FBgn0263561	mir-4984	0	0	0	0
	FBgn0261830	CG42762	0	0	0	0
	FBgn0261831	CG42763	0	0	0	0
	FBgn0263256	CG43394	8.58386	7.92277	7.38461	7.02656
	FBgn0051606	CG31606	2.45926	1.41929	0.302949	0.326002
	FBgn0261064	Rbsn-5	8.21733	6.13514	4.87045	5.6388
	FBgn0031992	CG8498	63.8666	83.1112	90.0087	84.7407
	FBgn0031993	Piezo	11.8265	12.5468	12.7329	14.1706
	FBgn0013442	fos28F	0	0	0.409197	0.220339
	FBgn0083970	CG34134	16.3729	11.4599	16.7561	15.8858
	FBgn0031995	CG8475	46.9735	51.7868	42.1449	40.8726
	FBgn0031996	CG8460	13.5504	13.4596	14.5193	15.9181
	FBgn0031997	CG8455	7.32285	7.85689	5.50525	4.67607
	FBgn0031998	CG8451	50.1219	49.28	33.9293	30.8534
	FBgn0031999	CG8419	0.303786	0.186888	0.148127	0.10648
	FBgn0003607	Su(var)205	34.0564	33.4863	27.6038	41.7868
	FBgn0015299	Ssb-c31a	23.003	22.4284	30.3753	33.1093
	FBgn0032000	CG8372	37.6427	44.1047	43.5078	38.576
	FBgn0032001	CG8360	308.963	315.491	262.916	248.121
	FBgn0032002	CG8353	49.292	31.5243	82.5191	67.7032
	FBgn0032003	CG8349	0.20402	0	0	0
	FBgn0032004	CG8292	1.15612	2.43924	3.88364	5.40413
	FBgn0032005	Snx6	81.7895	71.8519	111.854	93.9244
	FBgn0032006	Pvr	26.1292	20.1873	21.1279	17.657
	FBgn0028987	Spn2	0	0	0	0.312174
	FBgn0262943	CR43262	0	0	0	0
	FBgn0032008	CG14277	0	0.563201	3.60613	0
	FBgn0262359	CG43057	0	0	0	0
	FBgn0032010	CG8086	4.06935	4.86686	5.18653	5.21532
	FBgn0262374	mir-2b-1	0	0	0	0
	FBgn0003502	Btk29A	10.928	9.85875	10.0566	11.6464
	FBgn0011902	tRNA:K5:29A	0	0	0	0
	FBgn0264083	CR43752	0	0	0	0
	FBgn0261020	wol	32.0387	22.3617	22.1513	20.9383
	FBgn0032013	Scgalpha	0.414448	0.382502	1.11411	1.06212
	FBgn0032014	CG7840	16.2829	17.9202	14.5678	22.1382
	FBgn0032015	CG7830	45.7876	41.4676	47.9129	49.8085
	FBgn0032016	CG7818	6.48177	5.17714	5.24282	4.46735
	FBgn0032017	CG7810	3.75555	3.09494	3.41242	3.11139
	FBgn0032018	CG7806	16.9595	13.4349	13.0653	9.88644
	FBgn0262598	mtsh	0	0	0.0643468	0
	FBgn0032020	CG7787	8.83458	10.1452	11.847	8.88484
	FBgn0032021	CG7781	7.68184	5.63745	2.2603	16.2751
	FBgn0032022	CG14275	26.705	23.8167	22.2016	15.4543
	FBgn0032023	CG14274	0.107156	0	0	0.903105
	FBgn0032024	CG14273	1.90705	0.320066	0	0
	FBgn0032025	CG7778	51.1943	46.5412	19.537	35.9995
	FBgn0051901	Mur29B	115.908	20.7634	49.4965	1.41892
	FBgn0032026	CG7627	15.7944	13.8275	13.1114	23.0847
	FBgn0010265	RpS13	2826.67	3296.8	3374.8	3649.83
	FBgn0261437	CSN8	18.5456	23.8012	19.8312	18.6717
	FBgn0260439	Pp2A-29B	95.3222	85.3891	85.5741	87.7375
	FBgn0032029	CG17292	98.3789	119.979	185.465	153.848
	FBgn0032030	Wdr82	14.1164	11.6343	13.0091	13.6596
	FBgn0032031	CG13390	5.6775	6.18102	5.98575	4.60674
	FBgn0032032	CG17294	8.80928	9.14838	18.8946	12.2114
	FBgn0027094	Aats-ala	38.4209	38.3457	46.1826	45.7848
	FBgn0032033	CG13392	10.3884	11.2471	11.4564	12.9211
	FBgn0032034	Rcd4	3.03604	5.89016	4.19027	6.11971
	FBgn0263852	l(2)k12914	55.6431	45.3288	55.1354	70.4694
	FBgn0032036	CG13384	13.5176	12.5155	12.0372	13.7944
	FBgn0262001	CG42819	0	0	0	0
	FBgn0041717	snRNA:U6atac:29B	0	0	0	0
	FBgn0262002	CG42820	0	0	0	0
	FBgn0015583	Acp29AB	0	0	0	0
	FBgn0040098	lectin-29Ca	0.249045	0	0	0
	FBgn0040958	Peritrophin-15b	14.6168	0	1.97465	4.22778
	FBgn0040959	Peritrophin-15a	37.1351	1.5268	5.81797	8.01673
	FBgn0032039	CG13385	0	0	0	0
	FBgn0032040	CG13386	0.451892	0	0	0
	FBgn0051898	CG31898	0.181573	0	0.534056	0
	FBgn0001084	fy	1.45499	0.826376	1.42247	0.471702
	FBgn0020497	emb	21.0243	19.4332	21.3804	20.3768
	FBgn0014417	CG13397	17.4499	25.3695	32.4098	24.4462
	FBgn0032042	CG13398	6.83154	5.45326	4.60877	5.09399
	FBgn0027932	Akap200	255.184	294.447	176.869	207.883
	FBgn0001137	grk	4.87617	4.31658	4.57027	5.97417
	FBgn0027490	D12	1.75759	1.25118	1.37119	1.26729
	FBgn0043002	Chrac-14	4.46725	4.12578	5.88576	7.51731
	FBgn0002887	mus201	2.30427	2.01034	1.83792	2.02592
	FBgn0051897	CG31897	0	0.186458	0.197047	0.159351
	FBgn0027780	U26	3.9301	3.14601	3.37045	3.0369
	FBgn0026718	fu12	44.3874	34.6903	45.5492	48.8472
	FBgn0029173	fu2	5.17736	4.54307	3.23151	5.45029
	FBgn0262029	d	0.124673	0.0859297	0.0609481	0.0986581
	FBgn0053194	CheA29a	0	0	0	0
	FBgn0051896	tRNA:CR31896	0	0	0	0
	FBgn0051892	tRNA:CR31892	0	0	0	0
	FBgn0264340	CG43796	0	0	0	0
	FBgn0263489	unsRNA:d-a	0	0	0	0
	FBgn0032047	CG13088	1.44079	1.44061	1.87874	1.89813
	FBgn0263314	CG43400	15.4157	5.47627	0.390966	0
	FBgn0032048	Dh31	0.824139	0.126735	0.403214	1.73758
	FBgn0032049	Bace	839.109	1.52138	1.32046	1.58078
	FBgn0032050	CG13096	11.1942	11.1515	11.6942	18.3333
	FBgn0032051	CG13097	6.34505	5.79504	7.3404	8.87741
	FBgn0032052	CG13089	12.1389	9.78958	9.91121	9.06668
	FBgn0032053	mRpL51	23.0759	24.4438	21.0969	25.2184
	FBgn0032054	CG13090	11.1372	15.9209	10.9116	12.438
	FBgn0032055	CG13091	90.7341	168.508	14.4553	19.1779
	FBgn0016122	Acer	162.296	186.876	164.09	183.612
	FBgn0250903	lmg	8.91355	8.82723	7.6572	7.40768
	FBgn0028394	CG17834	19.236	8.9391	5.98776	5.00033
	FBgn0051604	tRNA:CR31604	0	0	0	0
	FBgn0051603	tRNA:CR31603	0	0	0	0
	FBgn0011259	Sema-1a	0.556744	0.419234	0.496058	0.587246
	FBgn0051895	tRNA:CR31895	0	0	0	0
	FBgn0264437	CR43855	2.70472	1.66858	0.910854	1.95123
	FBgn0051602	tRNA:CR31602	0	0	0	0
	FBgn0001114	Glt	292.294	387.557	407.906	398.172
	FBgn0032057	CG9287	0	0	0	0
	FBgn0051889	tRNA:CR31889	0	0	0	0
	FBgn0032058	CG9289	0	0	0	0
	FBgn0051890	tRNA:CR31890	0	0	0	0
	FBgn0051888	tRNA:CR31888	0	0	0	0
	FBgn0032059	PrBP	5.72992	9.25574	7.1717	8.06236
	FBgn0260861	Trs23	11.4601	12.0237	12.0407	13.2375
	FBgn0004914	Hnf4	65.1434	77.1868	78.4096	66.4109
	FBgn0032061	CG9314	0.847277	1.39013	0.643795	0.19827
	FBgn0003209	raw	34.923	32.8878	33.1487	32.0256
	FBgn0032065	CG12438	0	0	0	0
	FBgn0032066	CG9463	0.680425	0	0	0.0550406
	FBgn0032067	CG9465	0.0555818	0	0	0
	FBgn0032068	CG9466	8.92097	0.0490017	0.0517897	0.111684
	FBgn0032069	CG9468	22.8933	0.0474739	0.150516	0.108196
	FBgn0261627	CG42710	0	0	0	0
	FBgn0261629	CG42712	0	0	0	0
	FBgn0029123	SoxN	0.158621	0.329333	0.231929	0.333468
	FBgn0052986	CG32986	0	0	0	0
	FBgn0052987	CG32987	0	0	0	0
	FBgn0052988	CG32988	0	0	0	0
	FBgn0052983	CG32983	0	0	0	0
	FBgn0032072	CG9483	0	0	0	0
	FBgn0261630	CG42713	0	0	0	0
	FBgn0085427	CG34398	5.38241	2.98725	4.17424	3.30066
	FBgn0032074	Tsp29Fa	90.7604	10.078	17.5939	8.03295
	FBgn0032075	Tsp29Fb	391.24	122.347	77.6998	15.8486
	FBgn0032076	CG9510	110.146	92.7069	118.652	119.13
	FBgn0032077	CG9515	8.53809	9.2539	8.39048	6.74318
	FBgn0032078	C1GalTA	20.9776	14.7385	14.8113	15.3159
	FBgn0032079	CG31886	39.4738	24.0905	22.6457	23.338
	FBgn0032080	CG9525	0.0810202	0	0	0
	FBgn0052985	CG32985	0.17184	0.0792938	0	0
	FBgn0052984	CG32984	0	0.080511	0	3.58195
	FBgn0032082	CG18088	0.24644	0	0	0.691767
	FBgn0032083	CG9541	0	0	0.071632	0.0772287
	FBgn0032084	CG13101	5.82388	6.62739	4.18305	3.44712
	FBgn0040963	CG18662	0	0	0	0
	FBgn0011705	rost	20.9356	13.7853	11.5391	11.0352
	FBgn0032085	CG9555	6.16623	0.13236	0.140375	0
	FBgn0013746	alien	25.6905	28.6032	25.1218	27.435
	FBgn0032086	CG17906	1.1765	0.217234	0.693604	0.248936
	FBgn0040964	CG18661	3.65821	4.50298	3.54916	4.60078
	FBgn0015316	Try29F	1.42059	0.74938	0.995714	0.643419
	FBgn0032087	CG9568	229.92	27.7203	68.6569	4.55112
	FBgn0032088	CG13102	34.1684	4.66198	4.22022	1.23865
	FBgn0032089	Rcd-1r	0.607669	0.140224	0.148764	0
	FBgn0032090	CG9582	0	0	0	0
	FBgn0051708	CG31708	0	0	0	0
	FBgn0032094	CG12439	0	0	0	0
	FBgn0032095	Toll-4	0	0	0.046734	0
	FBgn0051609	CG31609	0	0	0	0
	FBgn0032096	Or30a	0	0	0	0
	FBgn0052982	CG32982	7.06184	2.62693	1.91784	2.28839
	FBgn0032100	CG13108	0	0	0	0
	FBgn0032101	CG9586	22.8117	23.0788	25.3551	23.8937
	FBgn0041092	tai	12.9299	11.1632	10.1101	10.3245
	FBgn0032104	aust	0	0	0	0
	FBgn0051885	tRNA:CR31885	0	0	0	0
	FBgn0263985	CR43734	0	0	0	0
	FBgn0032105	borr	0.829271	1.38848	1.48806	1.87475
	FBgn0028433	Ggamma30A	9.7015e-11	9.13146e-05	3.11363e-104	2.34938e-06
	FBgn0263984	CG43733	7.68523	4.18967	0.534072	9.86175
	FBgn0040097	lectin-30A	0	0	0	0
	FBgn0262033	CG42844	0	0	0	0
	FBgn0032109	CG17005	0	0	0	0
	FBgn0010314	Cks30A	0.634683	0.292921	0.15542	3.85117
	FBgn0026439	Eaat1	52.1826	61.2917	74.035	51.1625
	FBgn0032110	CG3748	0	0	0	0
	FBgn0263082	CG43350	0	0	0	0
	FBgn0032111	CG13110	0	0	0	0
	FBgn0263323	CG43404	0	0	0	0
	FBgn0085210	CG34181	0	0	0	0
	FBgn0085395	Shawl	0	0	0.0434818	0.187356
	FBgn0264447	CR43865	0	0	0	0
	FBgn0012036	Aldh	522.042	508.4	604.745	576.743
	FBgn0032115	CG4438	0	0	0	0
	FBgn0032116	CG3759	22.752	3.89841	3.67509	2.68586
	FBgn0000640	Fbp2	2.90258	16.6515	0.203484	0
	FBgn0262036	CG42847	0	0	0	0
	FBgn0032117	FucTB	2.67976	1.39794	2.05071	2.21006
	FBgn0011232	scat	7.26027	5.52721	4.82241	4.77067
	FBgn0032119	CG3769	0	0.122407	0	0
	FBgn0085211	RpS28-like	0	0	0	0
	FBgn0002973	numb	23.2989	12.4429	10.795	4.86897
	FBgn0053723	CG33723	0	0	0	0
	FBgn0264269	CR43769	0	0	0	0
	FBgn0004868	Gdi	178.66	172.293	181.356	167.241
	FBgn0032120	CG33298	6.31579	4.07943	3.89907	4.27203
	FBgn0032123	Oatp30B	21.8402	25.192	18.9315	20.5454
	FBgn0032122	CG31883	0.320322	0	0	0
	FBgn0032124	CG17855	10.1663	1.56379	1.75961	0.446237
	FBgn0032125	Cpr30B	0	0	0	0
	FBgn0032126	CG13113	0.694047	0.320474	1.37021	4.42202
	FBgn0032127	CG13114	0.226656	0.836763	0.443204	22.2111
	FBgn0032129	jp	6.14056	4.69381	7.72743	6.92989
	FBgn0032130	CG3838	9.56918	7.7059	8.71778	10.0879
	FBgn0028479	Mtpalpha	196.067	261.337	215.798	202.328
	FBgn0051709	CG31709	0	0	0	0.201844
	FBgn0014179	gcm	0	0	0	0
	FBgn0263612	CR43621	0	0	0	0
	FBgn0032131	CG3841	11.6217	0	0.31966	0.180379
	FBgn0032132	CG4382	0	0	0	0
	FBgn0019809	gcm2	0	0	0	0
	FBgn0040070	Trx-2	233.349	215.83	186.753	175.567
	FBgn0032135	GlcAT-S	6.78385	4.2469	4.08907	4.95981
	FBgn0051882	CG31882	0	0	0.229074	0
	FBgn0032136	CG15828	107.929	117.282	158.773	149.294
	FBgn0053299	CG33299	0	0.247624	0.593827	0.639049
	FBgn0000273	Pka-C1	15.9261	14.715	14.4573	12.9932
	FBgn0015393	hoip	45.5518	35.1661	36.8988	82.4066
	FBgn0011207	pelo	16.7879	15.8691	15.1987	15.4406
	FBgn0051710	CG31710	9.05699	4.96532	2.78647	5.09843
	FBgn0032138	CG4364	173.169	190.304	176.692	213.967
	FBgn0028704	Nckx30C	0.19226	0.148347	0.347682	0.749691
	FBgn0032139	CG13116	11.8306	13.1392	14.3195	11.5192
	FBgn0032140	CG13117	33.7536	22.2624	20.7849	18.2136
	FBgn0015035	Cyp4e3	15.8726	17.8655	10.9973	4.8606
	FBgn0022720	zf30C	9.13982	8.98983	8.54105	9.78477
	FBgn0011291	Taf11	9.54365	7.04881	6.33063	8.33074
	FBgn0025117	und	88.6477	80.3933	79.9407	90.8241
	FBgn0032142	CG13120	0.414329	0.254951	0	0.145646
	FBgn0032143	CG4017	0.106635	0	0	0
	FBgn0032144	CG17633	85.859	0.364073	0.514588	16.2195
	FBgn0032145	CG13121	0	0	0	0
	FBgn0065108	ppk16	0.10791	0.298779	0	0
	FBgn0065109	ppk11	0.111598	0	0	0.235168
	FBgn0032147	IP3K1	13.4568	12.0717	10.5443	8.71028
	FBgn0032149	CG4036	7.21567	8.47284	8.93911	8.29829
	FBgn0042174	CR18854	197.742	285.043	225.372	203.392
	FBgn0032150	CG13123	1.50831	2.2511	1.48147	2.37161
	FBgn0032151	nAcRalpha-30D	0	0	0.0464112	0.275346
	FBgn0264266	CR43766	0	0	0	0
	FBgn0029174	FKBP59	87.4337	88.1111	102.229	103.18
	FBgn0085212	CG34183	12.0276	9.52288	19.9977	16.0095
	FBgn0032153	CG4537	4.23073	7.82367	6.35963	6.06406
	FBgn0032154	CG5924	3.02414	3.26935	3.96607	4.82106
	FBgn0063449	Uhg2	29.6933	23.1365	42.4696	45.5199
	FBgn0063391	snoRNA:U14:30Eb	0	0	0	0
	FBgn0063392	snoRNA:U14:30Ea	0	0	0	0
	FBgn0063389	snoRNA:Me18S-G1620	0	0	0	0
	FBgn0025881	snoRNA:Me18S-A1576	0	0	0	0
	FBgn0010520	Bka	14.6103	11.0807	12.318	16.5752
	FBgn0004867	RpS2	2151.2	2264.41	2336.67	2726.53
	FBgn0053300	Muc30E	0.0604561	0.0557857	0.0638175	0.0952932
	FBgn0032156	CG13124	35.9485	30.6387	38.0712	35.9387
	FBgn0032157	Etl1	8.51978	7.7644	7.1739	7.17872
	FBgn0024285	Srp54	17.2422	15.1165	13.8495	15.0952
	FBgn0040064	yip2	344.521	389.319	274.876	269.321
	FBgn0025700	CG5885	103.999	81.3306	102.103	139.258
	FBgn0032160	CG4598	97.551	106.437	102.626	89.4191
	FBgn0032161	CG4594	14.4622	15.4877	16.4506	14.9067
	FBgn0032162	CG4592	68.896	81.7579	76.9313	66.1647
	FBgn0032163	TbCMF46	0	0.0892376	0	0.101829
	FBgn0259712	CG42366	0	0.059771	0.0632004	0.0681385
	FBgn0259713	CG42367	0	0	0	0
	FBgn0051876	Cpr30F	0	0	0	0
	FBgn0051712	CG31712	15.4539	15.4406	15.7206	13.8857
	FBgn0051713	Apf	23.8744	21.6778	19.6195	18.5128
	FBgn0032166	CG4619	6.67569	7.86322	8.23585	8.87784
	FBgn0032167	CG5853	85.9458	57.7124	54.9673	34.0352
	FBgn0262428	mir-87	0	0	0	0
	FBgn0032168	CG13126	5.05874	4.57156	4.73832	6.43923
	FBgn0032169	CG4709	4.82541	4.1566	4.507	4.29275
	FBgn0032171	CG5846	5.95159	7.93644	8.65835	9.55668
	FBgn0032170	CG4658	26.3526	19.4709	17.4226	21.1987
	FBgn0263766	CR43683	27.4527	26.2736	26.5709	22.5792
	FBgn0032172	CG5850	17.402	20.7379	18.7737	16.9287
	FBgn0015664	Dref	8.37144	7.83626	6.93355	8.869
	FBgn0011272	RpL13	1828.94	2060.09	2233.82	2309.18
	FBgn0040965	CG13130	0.233509	0	0	0
	FBgn0000180	bib	0.887924	0.910411	0.336725	0.674295
	FBgn0051875	CG31875	2.56937	1.86356	1.07969	1.16299
	FBgn0051755	SoYb	0.653897	0.381077	0.268304	1.37448
	FBgn0043456	CG4747	31.8742	29.6205	29.791	32.1831
	FBgn0011584	Trp1	127.295	131.702	136.258	124.404
	FBgn0032175	CG13131	0	0.0629121	0	0
	FBgn0032176	CG13127	0	0	0	0
	FBgn0027600	obst-B	2.85018	2.48469	4.65291	4.51156
	FBgn0053301	CG33301	29.0801	16.7892	2.90488	2.47827
	FBgn0053302	Cpr31A	0.291985	0	0	0
	FBgn0011823	Pen	5.51043	3.48866	4.06383	22.1767
	FBgn0032178	Spn31A	1.1537	1.77473	2.25732	2.70279
	FBgn0032180	CG31714	0.163856	0.0604793	0.0319355	0.0688792
	FBgn0032181	CG13133	0.592423	0.27341	1.30508	0.468715
	FBgn0083945	CG34109	4.9753	2.564	0.252193	16.7899
	FBgn0262032	CG42843	0	0	0	0.101829
	FBgn0032184	CG13135	0	0	0	0
	FBgn0032187	CG4839	6.71914	2.08703	0.890881	0.192303
	FBgn0032188	CG13137	0	0	0	0
	FBgn0028675	Sur	0.543757	0.301044	0.44491	0.388439
	FBgn0051874	CG31874	0.318137	0.0978723	0.310951	0
	FBgn0032189	Ripalpha	3.6735	5.086	6.22329	5.21547
	FBgn0005593	RpL7	2327.04	2785.93	2985.04	3103.87
	FBgn0085188	CG34159	27.5479	27.1014	25.3861	27.8366
	FBgn0032191	CG5734	16.0339	16.1928	14.1018	15.2025
	FBgn0032192	CG5731	0.291731	0.610277	0.380052	0.409647
	FBgn0032193	CG5727	6.23623	7.83042	6.13118	5.54463
	FBgn0032194	CG4901	7.3856	8.26159	7.28235	10.8734
	FBgn0024320	Npc1a	28.7961	26.7933	25.3354	20.9947
	FBgn0250843	Pros35	134.454	145.912	159.811	120.042
	FBgn0032195	CG4908	4.58622	6.29653	5.76924	4.42047
	FBgn0032196	CG5708	15.6194	14.7405	14.4744	12.3092
	FBgn0032197	CG5694	10.1299	8.22577	8.62032	9.19059
	FBgn0032198	eEF1delta	179.796	189.061	215.716	234.009
	FBgn0051720	CG31720	3.40383	0.160017	1.29648	0.425155
	FBgn0004419	me31B	54.8721	53.2163	48.6381	116.782
	FBgn0024248	chico	19.8814	17.0495	21.9343	19.4663
	FBgn0000229	bsk	24.5018	19.0328	23.1655	19.0715
	FBgn0051717	CG31717	34.8477	41.5248	35.3576	30.7676
	FBgn0010407	Ror	0.146498	0.202793	0	0.0770809
	FBgn0032200	CG5676	43.8927	49.6017	41.4735	39.7162
	FBgn0026379	Pten	8.22905	7.0342	7.14005	8.54884
	FBgn0011305	Rsf1	13.0635	13.5807	14.3058	18.3965
	FBgn0032202	CG18619	66.8016	70.8396	61.0123	63.0194
	FBgn0259482	Mob3	14.8002	18.6664	19.2323	14.9831
	FBgn0032204	CG4953	8.992	10.5539	6.58942	8.85242
	FBgn0032205	CG4957	7.16697	9.92481	10.1184	11.3692
	FBgn0260750	Mulk	13.2417	12.9781	14.2947	13.6756
	FBgn0003751	trk	0.434616	0	0.213367	0.919063
	FBgn0260749	Utx	6.29881	5.73706	6.79491	7.32083
	FBgn0054043	CG34043	93.1431	51.7454	33.8737	1.07799
	FBgn0032208	CG5604	40.566	47.036	54.0087	43.1407
	FBgn0032209	Hand	25.0451	33.2822	46.588	43.0596
	FBgn0032210	CYLD	13.0116	8.931	10.0635	9.41589
	FBgn0032211	CG13138	0	0	0	0.268025
	FBgn0005322	nmd	49.2322	50.2377	71.869	51.4836
	FBgn0032213	CG5390	125.647	141.163	177.524	140.459
	FBgn0032214	CG4968	20.6463	26.5777	23.221	25.8116
	FBgn0027491	Cdk5alpha	0.576279	0.505175	0.178226	1.53986
	FBgn0032215	CG5385	13.5255	14.9087	23.3742	22.6137
	FBgn0032216	CG5384	62.7585	62.749	63.3107	56.7436
	FBgn0032217	CG4972	28.6116	28.4129	28.8806	28.419
	FBgn0032218	CG5381	65.421	74.7861	62.4491	55.9337
	FBgn0032219	CG4995	21.5353	33.1892	28.1594	38.4659
	FBgn0011703	RnrL	3.38748	1.71048	1.93328	7.05995
	FBgn0032221	CG5375	0.162644	0.150099	0.397025	0.513594
	FBgn0032222	CG5037	26.146	22.6028	26.1466	22.4427
	FBgn0032223	GATAd	7.22963	5.66964	4.70251	5.13336
	FBgn0019932	SamDC	50.0723	58.1099	48.3051	59.9232
	FBgn0051715	CG31715	33.7876	31.5702	25.177	27.4431
	FBgn0032224	Sps2	90.5516	134.088	134.775	84.5944
	FBgn0032225	CG5022	0.241029	0.889747	1.09824	0.676525
	FBgn0085396	CG34367	0	0	0	0.376317
	FBgn0032228	CG5367	0.374557	0.115235	0	1.31607
	FBgn0032229	CG5045	42.5356	45.3101	41.357	39.2471
	FBgn0027568	Cand1	13.8726	12.8739	9.98695	12.0123
	FBgn0003087	pim	0.405858	1.58938	0.597395	3.00259
	FBgn0032230	lft	5.83312	5.51121	3.1258	3.80744
	FBgn0032231	CG5056	14.3627	16.2758	12.8062	15.2984
	FBgn0041723	rho-5	0.102107	0.125627	0.0331695	0.50078
	FBgn0053303	CG33303	53.934	56.4361	67.7373	62.6248
	FBgn0032233	dpr19	0.0771448	0	0.0753135	0.366808
	FBgn0032234	gny	5.93166	6.41558	5.68872	5.76772
	FBgn0032235	CG5096	72.5692	8.43518	17.2836	1.50844
	FBgn0004106	cdc2	1.52416	2.18852	0.829767	6.07837
	FBgn0032236	mRpS7	28.0294	24.03	25.5897	27.0196
	FBgn0000413	da	14.9414	12.8194	13.3963	14.1142
	FBgn0262782	Mdh1	833.827	978.568	844.632	834.223
	FBgn0051716	Cnot4	31.7437	25.2901	24.3467	28.0919
	FBgn0032240	CG17768	25.1011	16.4045	22.3158	27.165
	FBgn0067622	LSm-4	2.81293	0.586141	3.58936	4.63548
	FBgn0051718	Ir31a	0.0864526	0.0797853	0	0
	FBgn0025366	Ip259	266.627	315.285	328.53	346.548
	FBgn0003942	RpS27A	3835.41	4206.24	4954.29	5019.15
	FBgn0032242	CG5355	47.2496	39.9171	30.9881	33.1911
	FBgn0032243	Klp31E	4.39597	4.63002	3.83191	3.38609
	FBgn0032244	RfC3	1.60161	1.03486	0.941334	3.54949
	FBgn0005683	pie	0.587928	1.11051	1.80445	2.03358
	FBgn0032246	CG5168	53.4471	47.8596	53.3799	50.6064
	FBgn0262601	SmB	19.6876	13.6918	18.6066	21.384
	FBgn0022268	KdelR	74.9204	61.7934	60.1305	68.0889
	FBgn0032247	CG5188	7.19753	8.26442	8.08735	8.71179
	FBgn0032248	CG5343	8.40132	9.23289	10.2057	6.97546
	FBgn0004915	TfIIB	20.2685	18.5924	14.1089	13.7625
	FBgn0032249	CG5337	1.46691	1.09335	0.660405	1.12742
	FBgn0032250	holn1	6.45576	8.31467	9.55543	7.76105
	FBgn0027052	CHIP	17.9779	20.1954	20.5965	22.4871
	FBgn0032251	CG13142	3.95415	3.97213	2.81448	3.22872
	FBgn0032252	CG6232	3.06362	3.87378	6.34181	4.5119
	FBgn0065110	ppk10	0.239383	0.22094	0.234106	0.378438
	FBgn0032253	CG5322	18.8859	17.7237	13.5157	11.8202
	FBgn0027611	CG6206	300.315	335.78	312.145	307.169
	FBgn0051719	RluA-1	3.54639	1.80683	3.79669	3.06155
	FBgn0032256	RluA-2	3.36635	2.88047	3.64065	3.6927
	FBgn0026431	Grip75	4.97274	3.01162	2.65497	2.78037
	FBgn0032258	CG7456	10.8426	8.4708	8.53494	9.39652
	FBgn0032259	CG6144	4.26316	5.21207	3.75445	5.10001
	FBgn0032260	CG13144	2.03991	1.98731	2.65922	1.79121
	FBgn0086347	Myo31DF	25.4006	5.63011	7.49706	7.28251
	FBgn0032261	CG6094	8.44683	10.3149	15.5522	12.9881
	FBgn0032262	CG7384	25.2217	40.7666	43.012	39.8118
	FBgn0021953	Fatp	206	265.959	327.227	192.814
	FBgn0010398	Lrr47	1.95474	1.40318	2.01602	2.74586
	FBgn0032264	Lip4	176.818	194.69	98.7932	99.9994
	FBgn0032265	CG18301	0	0.474055	0.125618	0.270733
	FBgn0032266	CG18302	0	0.0719603	0.0761268	0.246202
	FBgn0051721	Trim9	2.88162	0.193353	0.255494	0.275435
	FBgn0032268	CG6138	0	0	0	0
	FBgn0032269	w-cup	0	0	0	0
	FBgn0250826	CG34160	0	0	0	0
	FBgn0085190	CG34161	0	0	0	0
	FBgn0032271	CG7329	0	0	0	0
	FBgn0051872	CG31872	0	0	0	0
	FBgn0043825	CG18284	0	0	0	0
	FBgn0032275	CG17097	0	0	0	0
	FBgn0032276	CG17098	0	0	0	0
	FBgn0051871	CG31871	0.641782	0.0658072	0	0.300139
	FBgn0040496	CG17104	0.28772	0.265537	0.281105	0.605996
	FBgn0032280	CG17105	0	0	0	0
	FBgn0032281	CG17107	0	0	3.28596	1.41048
	FBgn0032282	CG7299	0	0.304619	0	0
	FBgn0032283	CG7296	25.8054	12.7553	32.3117	31.2794
	FBgn0032284	CG7294	0.851962	0	0	1.36066
	FBgn0032285	CG17108	260.747	270.496	218.562	174.681
	FBgn0032286	CG7300	2.38457	4.59308	4.12717	2.2896
	FBgn0023496	Lip1	0.216276	0.199607	0.211408	0.113926
	FBgn0024740	Lip2	2.50315	1.73275	1.83639	1.58317
	FBgn0032287	CG6415	80.7574	104.225	119.681	103.105
	FBgn0032289	CG6431	0	0	0	0
	FBgn0032290	CG6443	9.40956	9.94609	10.1059	9.60722
	FBgn0032291	CG17118	0	0	0	0.201844
	FBgn0032292	CG6750	56.3153	64.6622	66.7714	52.9891
	FBgn0032293	Dpy-30L1	11.6125	13.6845	9.90376	15.3352
	FBgn0027868	Nup107	9.28599	9.73782	7.29453	7.8014
	FBgn0032294	Vha16-5	0	0	0	0.182213
	FBgn0032295	CG12299	1.27315	1.08447	1.146	2.00802
	FBgn0032296	CG6729	7.36746	7.55414	8.78284	7.57593
	FBgn0263528	mir-4970	0	0	0	0
	FBgn0032297	CG17124	189.4	224.258	184.56	207.2
	FBgn0027550	CG6495	13.0169	9.83363	4.04689	7.51806
	FBgn0015320	UbcD2	22.4424	18.8798	22.0869	24.2606
	FBgn0032298	CG6724	10.5062	10.7337	10.9288	13.0898
	FBgn0032299	CG17127	2.88032	7.45323	5.16729	5.54858
	FBgn0051869	CG31869	2.56413	1.81407	0.695133	4.0793
	FBgn0051870	CG31870	0	0	0	0
	FBgn0011676	Nos	0.255164	0.126529	0.257816	0.285143
	FBgn0032305	CG6700	17.3825	14.6821	15.7716	15.3455
	FBgn0263560	mir-4987	0	0	6.62895e-251	0
	FBgn0032303	CG6508	0	0	0	7.82533
	FBgn0032304	CG17134	0	0	0	0
	FBgn0260453	CG17140	0	0	0	0
	FBgn0260454	CG17139	0	0.0637339	0	0
	FBgn0069354	Porin2	0.343605	0.158579	0.505131	0.181368
	FBgn0004363	porin	647.084	568.45	543.682	600.163
	FBgn0027453	Dnz1	8.39536	5.35164	5.66336	6.56047
	FBgn0262599	CG43129	0.301473	0.282103	0.200511	0.952586
	FBgn0024227	ial	0.15237	0.703211	0.298419	0.643037
	FBgn0027363	Stam	54.2098	42.8865	42.8744	40.0798
	FBgn0264351	CR43807	0	0	0	0
	FBgn0032311	CG12517	0	0.745542	0	5.15261
	FBgn0032312	CG14071	0	0	0.327528	0
	FBgn0032313	CG14070	0	0	0	0
	FBgn0032314	CG7309	0	0	0.0816179	0
	FBgn0032315	CG14069	0	0	0	0
	FBgn0261871	dpr2	0	0	0	0.225631
	FBgn0032318	CG14072	0	0	0	0
	FBgn0053129	CG33129	74.1778	80.1569	75.4029	84.581
	FBgn0032321	YL-1	10.6916	8.8016	7.35479	7.7722
	FBgn0032322	CG16743	290.151	299.598	342.182	357.981
	FBgn0000018	abo	7.20201	7.17848	6.19207	5.76419
	FBgn0010612	l(2)06225	626.255	762.586	742.562	769.677
	FBgn0041781	SCAR	22.0879	19.2583	17.1218	16.5362
	FBgn0004872	piwi	2.44011	1.02797	0.465623	7.02876
	FBgn0026148	CG12253	1.31144	0.672488	0.998579	1.07593
	FBgn0026147	CG16833	6.50988	6.31404	5.91059	10.0192
	FBgn0000146	aub	1.55656	0.672217	1.18095	4.97198
	FBgn0040096	lectin-33A	39.5715	43.6592	110.977	87.0256
	FBgn0015756	RpL9	2505.9	2838.83	3038.02	3085.76
	FBgn0021761	Nup154	5.30077	5.29615	4.66758	5.95558
	FBgn0032329	Art8	5.34728	5.89538	7.99876	8.46149
	FBgn0250837	dUTPase	14.6242	10.4822	8.34004	25.0556
	FBgn0032330	Samuel	8.46901	6.19987	5.22681	6.00856
	FBgn0023415	Acp32CD	0	0.205865	0	0
	FBgn0032331	CG14913	0.105102	0.194001	0.308171	0.110716
	FBgn0040967	CG18666	0	0	0	0
	FBgn0032335	CG14915	0	0	0	0
	FBgn0263971	CG43725	0	0	0	0
	FBgn0032336	Ast-C	6.71811	0.137837	0.146216	0.315077
	FBgn0032337	Ast-CC	0	0.286115	0	0
	FBgn0032338	CG16854	0.119008	0	0.137783	0.187767
	FBgn0032339	CG4705	9.94993	10.1655	7.32699	8.64774
	FBgn0032340	Ge-1	9.90219	7.9275	7.24958	9.19599
	FBgn0032341	Reps	9.00989	7.79463	6.81035	8.24756
	FBgn0261983	l(2)gd1	15.0138	12.7868	12.8254	11.257
	FBgn0032343	CG6201	4.96183	6.17169	5.26414	5.67518
	FBgn0041246	Gr32a	0	0	0.124053	0.133682
	FBgn0027582	CG6230	20.9188	24.6328	28.797	21.014
	FBgn0032345	CG14921	0.205385	0.568808	0	0.434147
	FBgn0032346	Csl4	5.39223	5.12817	4.64243	6.20859
	FBgn0028700	RfC38	4.07764	4.45662	4.71994	3.73053
	FBgn0262647	Nup160	3.2917	3.25439	2.71687	3.67118
	FBgn0032348	CG4751	3.19791	2.07766	2.09877	2.57197
	FBgn0040211	hgo	18.5004	20.9812	19.9856	19.7537
	FBgn0010197	Gyc32E	0.0466175	0.0430178	0.0909222	0.147083
	FBgn0051867	CG31867	0	0	0	0
	FBgn0032350	CG6287	237.046	290.954	315.465	315.603
	FBgn0259822	Ca-beta	1.25144	0.782865	1.84002	2.22874
	FBgn0014076	Vm32E	0	2.71272	3.51218	6.28501
	FBgn0032354	CG4788	1.51674	2.33317	1.60734	1.9986
	FBgn0264441	CR43859	0	0	0.389946	0
	FBgn0264442	ab	0.520738	0.23481	0.24649	0.502832
	FBgn0086035	snoRNA:Me18S-G642	0	0	0	0
	FBgn0040232	cmet	0.207172	0.127499	0.134609	0.696846
	FBgn0052831	CG33695	6.19179	4.86839	5.23293	4.92933
	FBgn0032358	Ppt2	54.1898	60.8377	65.1394	57.4945
	FBgn0020270	mre11	4.77179	4.55828	4.49625	3.87749
	FBgn0032359	Osi21	0	0	0	0
	FBgn0263328	CR43409	0	0	0	0
	FBgn0263874	CR43721	0	0	0	0
	FBgn0032360	CG14926	0	0	0	0
	FBgn0000287	salr	0.271808	0.250773	0.454374	0.327329
	FBgn0263764	CG43681	0	0	0	0
	FBgn0261648	salm	2.69108	4.10676	5.44511	4.64897
	FBgn0263087	CG43355	2.16809	1.99826	1.53294	2.30534
	FBgn0003313	sala	0	0	0.293268	0.631454
	FBgn0032361	CG6488	6.1186	7.15244	4.77954	4.20776
	FBgn0032362	spz4	0.0559465	0.103256	0.218285	0.0588397
	FBgn0032363	CG6509	7.39412	6.16375	5.41906	7.4093
	FBgn0032364	CG4970	0	0	0	0
	FBgn0032365	CG14929	0	0	0	0
	FBgn0032366	CG14930	0	0	0	0
	FBgn0262683	CG43153	0.277404	0.512267	0	0
	FBgn0028490	CG31705	459.753	596.417	639.113	468.611
	FBgn0051706	CG31706	0.958965	1.0327	1.72216	3.87939
	FBgn0085191	CG34162	0	0	0	0
	FBgn0261707	CR42743	0	0	0	0
	FBgn0263386	CG43438	0	0	0	0
	FBgn0028412	Mst33A	0	0	0	0
	FBgn0032367	CG6555	0	0	0	0
	FBgn0015400	kek2	0	0	0	0.302899
	FBgn0032368	spag4	0	0	0	0
	FBgn0032369	CG6614	0	0	0	0
	FBgn0032370	CG12307	0	0	0	0
	FBgn0032371	CG4983	0	0	0.130104	0
	FBgn0262786	CG43167	0	0	0	0
	FBgn0032372	CG4988	0	0	0	0
	FBgn0032373	Vha100-5	34.6979	3.21991	3.21546	0.271901
	FBgn0259960	CG42470	0	0	0	0
	FBgn0259961	CG42471	0	0	0	0
	FBgn0259962	Sfp33A1	0	0	0	0
	FBgn0032374	CG14931	0.215478	0.198925	0.846213	2.96161
	FBgn0032375	CG14932	0	0	0	0
	FBgn0032376	Tsp33B	0	0	0	0
	FBgn0032377	CG14937	0.541453	0.299834	0	0.456349
	FBgn0020309	crol	17.9075	15.4349	15.1391	13.7806
	FBgn0086036	snoRNA:Me18S-A934	0	0	0	0
	FBgn0032378	CycY	16.0285	16.3739	14.5035	15.7259
	FBgn0259225	Pde1c	12.1133	6.38639	6.25416	6.20341
	FBgn0000588	esc	1.6068	1.01952	1.17761	1.37505
	FBgn0261056	Sfp33A4	0	0	0	0
	FBgn0259963	Sfp33A2	0	0	0	0
	FBgn0264565	CR43937	0	0	0	0
	FBgn0259964	Sfp33A3	1.89858	0.584987	0	0
	FBgn0264564	CG43936	0	0	0.734191	0
	FBgn0051704	CG31704	124.794	44.1759	88.2853	63.3636
	FBgn0040968	CG14933	103.749	172.051	59.1425	67.1863
	FBgn0259989	CG42486	291.501	256.703	236.909	191.565
	FBgn0032381	Mal-B1	0.562093	1.03751	0.0915199	0.493247
	FBgn0032382	Mal-B2	286.827	319.995	245.457	257.807
	FBgn0261805	CG42751	8.71691	6.90616	9.32685	10.0114
	FBgn0026392	Or33a	0	0	0	0
	FBgn0026391	Or33b	0	0	0	0
	FBgn0026390	Or33c	0	0	0	0
	FBgn0005664	Cry	7.22979	0.0834036	0.353098	0.475768
	FBgn0032385	CG16964	0	0	0	0
	FBgn0263019	CR43314	0.0583017	0.0134483	0	0.0995086
	FBgn0263107	bft	0	0	0	0
	FBgn0032387	CG16965	19.6664	5.26257	10.3475	7.0779
	FBgn0032388	CG6686	17.8158	15.8319	15.9514	15.5489
	FBgn0085192	CG34163	12.6905	16.4154	15.6384	15.7175
	FBgn0261266	zuc	0.484019	0.29785	0.316102	0.681094
	FBgn0032390	dgt2	0.924193	0.85323	0.45397	3.17726
	FBgn0032391	escl	2.86605	1.64775	1.60652	1.88009
	FBgn0051866	Ada1-2	5.73893	4.67421	5.54097	4.00911
	FBgn0042127	CG18789	3.84982	2.85044	2.97974	5.01724
	FBgn0051864	Qtzl	18.496	20.2769	15.5724	12.5676
	FBgn0051865	Ada1-1	4.19214	3.56006	3.36836	3.62866
	FBgn0042125	CG18787	5.62201	5.77419	5.33426	6.61726
	FBgn0032393	CG12264	46.9838	48.164	46.9306	38.9618
	FBgn0032394	CG6746	287.394	400.059	423.614	377.462
	FBgn0014019	Rh5	0.129269	0.357938	0.126469	0.136283
	FBgn0032395	CG6734	3.96397	3.90605	3.62322	3.41913
	FBgn0010497	dmGlut	31.5923	17.0645	16.3811	5.24078
	FBgn0042126	CG18788	0.281734	0	0.0917447	0
	FBgn0032397	Tom70	7.80821	8.3331	6.39587	8.55784
	FBgn0032398	CG6766	39.4133	42.8899	48.2737	39.5211
	FBgn0032399	CG6785	0.523772	0.780751	0.549847	0.635279
	FBgn0032400	CG6770	1314.52	1212.14	1164.14	1189.67
	FBgn0032401	CG6792	2.76267	2.5496	2.69781	1.32191
	FBgn0032402	CG14945	25.7822	35.6879	33.745	27.2303
	FBgn0028425	JhI-21	8.74364	8.29128	6.50075	12.496
	FBgn0032404	RpL7-like	66.145	70.0934	69.8792	84.1538
	FBgn0085193	CG34164	0.449247	0	0.88246	0.475115
	FBgn0027505	rab3-GAP	8.20753	7.71007	7.24289	7.07225
	FBgn0032405	CG14946	3.49646	2.11632	2.37456	4.39554
	FBgn0032406	CG14947	0	0	0	0
	FBgn0003145	prd	0	0	0	0
	FBgn0032407	Pex19	53.5246	52.6982	53.28	46.5835
	FBgn0032408	CG6712	10.8561	7.6983	11.529	11.4463
	FBgn0028707	Mt2	1.75953	1.35888	1.76281	1.8991
	FBgn0032409	Ced-12	4.91324	3.59193	4.48271	5.67882
	FBgn0029137	Patsas	0	0.0618413	0.196184	0.141007
	FBgn0027081	Aats-thr	51.7137	42.837	51.0021	55.9187
	FBgn0015797	Rab6	42.9333	40.1341	34.9049	33.4439
	FBgn0263234	Phae1	59.9933	6.36535	2.19644	0.910035
	FBgn0263235	Phae2	93.5646	1.19691	0.636463	0.228463
	FBgn0032414	CG17211	0.153991	0	0	0
	FBgn0032415	rho-6	1.69526	0.978135	0.624053	0.896062
	FBgn0032416	Gr33a	0	0	0	0.110868
	FBgn0051760	CG31760	0	0.0338361	0.0715252	0.347251
	FBgn0051861	CG31861	0	0	0	0
	FBgn0051860	CG31860	0	0	0	0
	FBgn0032419	CG17217	0	0	0	0
	FBgn0032420	CG6583	4.80009	6.96277	5.0402	5.06757
	FBgn0032421	crok	3.93868	5.12314	2.98365	4.91542
	FBgn0263088	CR43356	0	0	0.472574	0.507849
	FBgn0000114	aret	22.6688	20.288	18.8609	44.8773
	FBgn0032422	atilla	100.705	132.991	127.441	125.673
	FBgn0051759	CG31759	1.41127	1.64512	2.10281	2.11047
	FBgn0051862	CG31862	0	0	0	0
	FBgn0264361	CG43813	0	0	0	0
	FBgn0262475	bru-2	28.4312	23.7624	24.8627	18.1117
	FBgn0032424	CG17010	0.124045	0	0	0
	FBgn0041195	Pkd2	0.148752	0.137268	0.0967056	0.156412
	FBgn0043841	vir-1	1137.38	1301.55	1297.26	1112.43
	FBgn0032428	CG6405	0.533709	1.23152	1.17503	1.12549
	FBgn0032429	CG5446	51.2593	52.7489	36.8513	29.0951
	FBgn0032430	CG6388	10.6733	11.7512	10.1525	11.8307
	FBgn0032431	CG5435	1.05517	2.33783	1.03576	1.33851
	FBgn0040286	SC35	24.0595	17.4027	22.2429	26.0938
	FBgn0020443	Elf	45.7531	44.3587	44.2106	44.3129
	FBgn0263468	snoRNA:SC35-a	0	0	0	0
	FBgn0263469	snoRNA:SC35-b	0	0	0	13.3407
	FBgn0032433	Oatp33Ea	26.1087	0.102493	1.51691	0.350459
	FBgn0032434	CG5421	0	0	0.10365	0.124096
	FBgn0032435	Oatp33Eb	32.342	7.28214	5.83215	0.817458
	FBgn0032436	CG5418	0.761093	0.562011	1.19248	1.92719
	FBgn0032437	CR17024	0	0	0	0
	FBgn0259176	bun	98.5473	81.0737	96.4905	81.512
	FBgn0262203	mir-967	0	0	0	0
	FBgn0051858	t-cup	0	0.261333	0	0
	FBgn0261812	CG42754	0	0	0	0
	FBgn0262353	CG43051	53.5463	58.6391	70.7051	71.2281
	FBgn0263458	snoRNA:CG43051-a	0.000301241	3.90613e-05	0.00188708	33.8637
	FBgn0261709	CR42746	0	0	0	0.249321
	FBgn0085424	nub	10.2997	0.0917178	1.8084	0.158026
	FBgn0032439	Ref2	0	0	0	0
	FBgn0004394	pdm2	1.32559	0.123035	0.43331	0.0934708
	FBgn0032442	CG15485	0	0	0	0
	FBgn0032444	CG5525	65.5014	64.0251	55.548	61.9171
	FBgn0032445	CG6153	10.65	14.7492	15.7085	19.0585
	FBgn0032446	CG5780	1.75587	1.82362	0.862087	0.92833
	FBgn0032447	PICK1	0.507104	0.37441	0.0991109	0.455456
	FBgn0032448	CG5781	0	0	0	0
	FBgn0032449	CG17036	4.03541	2.5784	1.01124	1.08993
	FBgn0032450	CG5776	2.90991	2.4268	2.40154	2.8248
	FBgn0032451	spict	44.1826	45.8483	35.6174	33.602
	FBgn0032452	CG15484	0.624513	0.384351	0	0
	FBgn0032453	CG6180	91.2574	79.709	87.6897	92.92
	FBgn0032454	CG5787	8.17976	6.04711	5.34729	7.13416
	FBgn0032455	CG5792	14.6738	18.8048	19.9356	24.6622
	FBgn0032456	MRP	51.1562	37.8804	28.4077	27.9073
	FBgn0032457	CG15483	0	0	0	0
	FBgn0264366	CR43818	0	0	0	0
	FBgn0015399	kek1	0.54693	0	0.293076	0.775809
	FBgn0040508	ACXC	0	0	0	0
	FBgn0040509	ACXB	0	0	0	0
	FBgn0040510	ACXA	0	0	0	0
	FBgn0040506	ACXE	0	0	0	0
	FBgn0032462	CG16800	0	0	0	0
	FBgn0263598	Vha68-2	358.331	249.593	118.979	116.945
	FBgn0032464	Vha68-3	0.202185	0	0.0657689	0
	FBgn0032465	CG12404	28.5844	28.8447	25.3765	28.7479
	FBgn0020368	Vha68-1	6.45101	6.23934	8.13983	10.0158
	FBgn0021796	Tor	8.4239	8.48986	6.97026	7.38006
	FBgn0032467	CG9934	16.3427	17.7407	17.0039	14.5777
	FBgn0028965	A16	13.7256	13.6246	19.3825	15.8356
	FBgn0262160	CG9932	45.3412	44.3025	40.0249	34.5172
	FBgn0032470	CG5142	7.15846	7.97315	3.37448	4.07073
	FBgn0262352	CG43050	0	0	0	0.171725
	FBgn0032471	CG5122	0	0	0	0
	FBgn0032472	CG9928	723.494	712.567	948.328	896.594
	FBgn0040972	CG16978	15.4382	16.4202	29.4777	19.1292
	FBgn0028410	Pk34A	0	0	0	0
	FBgn0032473	CG5204	0	0	0.0684515	0.147595
	FBgn0032474	DnaJ-H	23.9858	20.3809	24.3591	19.0766
	FBgn0024291	Sir2	19.362	17.6337	14.1976	14.9115
	FBgn0032475	Sfmbt	5.9662	7.10914	5.8807	5.82736
	FBgn0264546	CG43925	0	0	0	0
	FBgn0032476	CG5439	6.77675	8.82445	8.07109	7.23362
	FBgn0032477	CG5287	20.3337	21.8432	20.0957	20.7217
	FBgn0032478	CG5458	0.706442	0.13041	0.276591	0.596053
	FBgn0032479	CG16974	27.5676	32.4874	29.2925	25.9199
	FBgn0051849	CG31849	1.13784	1.26007	0.962663	0.878138
	FBgn0032480	Edem2	19.1194	18.1205	20.5007	18.7839
	FBgn0032481	CG16972	2.23237	2.38253	2.41076	3.02381
	FBgn0032482	Pect	175.823	145.666	179.585	210.128
	FBgn0032483	CG15482	0.885854	0.490634	1.04203	0.374158
	FBgn0004191	snRNA:U2:34ABa	0	0	5.90679	17.2636
	FBgn0032484	kek4	0.198352	0	0.0645189	0.27824
	FBgn0004192	snRNA:U2:34ABb	9.11477	4.2361	5.90679	7.76862
	FBgn0032485	CG9426	7.88161	6.80388	7.68628	8.71556
	FBgn0032486	CG5705	2.72679	2.97432	3.637	4.05005
	FBgn0032487	Ski6	5.75849	2.84785	5.24768	4.78206
	FBgn0032488	CG16812	7.3999	7.45842	5.23237	6.56269
	FBgn0032489	CG15480	0	0	0	0
	FBgn0032490	CG16813	0	0	0	0
	FBgn0032491	CG16815	0	0	0	0
	FBgn0032492	Prosalpha6T	0	0	0	0
	FBgn0032493	CG15479	0.231746	0	0	0
	FBgn0027586	CG5867	50.7309	54.1717	74.1591	70.3654
	FBgn0032494	CG5945	67.3913	80.1768	150.463	103.266
	FBgn0041720	snRNA:U2:34ABc	9.11477	4.2361	5.90679	7.76862
	FBgn0003935	snRNA:U5:34A	0	0	6.55607	0
	FBgn0032495	CG16820	2.29679	2.22072	1.60372	2.53505
	FBgn0051728	CG31728	0.430376	0.340423	0.179953	0.323368
	FBgn0051851	CG31851	0	0	0	0
	FBgn0051730	CG31730	0	0	0	0
	FBgn0032497	CG6043	17.1827	13.8775	16.4332	14.06
	FBgn0028406	Drep-4	6.10333	5.99828	6.11373	5.67304
	FBgn0051848	CG31848	0.239709	0	0	0
	FBgn0032498	CG6108	1.58524	1.49763	1.80265	1.5472
	FBgn0032499	Uvrag	8.73716	6.60795	6.53856	7.11857
	FBgn0051729	CG31729	58.5763	46.6563	52.1734	44.1175
	FBgn0040973	CG16824	0	0	0.662995	0
	FBgn0264308	CG43778	0	0	0.0617302	0.0666366
	FBgn0264301	CG43779	0	0	0	0
	FBgn0032503	CG16825	0	0	0	0.0943725
	FBgn0032505	CG16826	0.463552	1.99676	30.8705	1193.59
	FBgn0032506	CG9395	0.0452473	0.0417538	0	0.271224
	FBgn0032507	CG9377	0	0	0	0
	FBgn0022069	Nnp-1	8.82415	10.1266	9.2144	12.4337
	FBgn0032509	CG6523	69.2992	72.8041	76.3218	69.7846
	FBgn0051852	Tap42	9.78851	9.40093	8.54221	9.90223
	FBgn0051855	CG31855	10.2442	7.41198	6.74096	8.92171
	FBgn0032511	CG9306	114.775	153.702	129.842	138.086
	FBgn0032512	CG9305	11.8375	10.4607	12.9019	11.7012
	FBgn0032513	CG6565	9.54203	12.0884	10.0816	13.1507
	FBgn0032514	CG9302	6.01946	6.02466	6.78912	9.28201
	FBgn0025724	beta'Cop	30.2683	28.0784	29.5208	30.6041
	FBgn0032515	loqs	9.59011	13.4086	10.6478	11.5593
	FBgn0032516	CG9293	10.3794	15.6246	11.2897	12.4692
	FBgn0032517	CG7099	2.41411	2.57031	2.17104	2.28564
	FBgn0032518	RpL24	1206.11	1365.01	1398.88	1490.32
	FBgn0032519	CG16957	0	0	0	0
	FBgn0032520	CG10859	0.0754826	0	0	0
	FBgn0032521	CG7110	1.54908	1.23889	1.81289	1.30317
	FBgn0003983	Vm34Ca	1.02199	3.77708	12.1894	205.71
	FBgn0032522	CG16848	0	0	0	0.158389
	FBgn0032523	CG16956	0	0	0.269108	0
	FBgn0264432	CG43850	0	0	0	0.412882
	FBgn0263354	CG42784	0.314919	0.217497	0.607755	0.868178
	FBgn0026760	Tehao	7.64747	0.294053	0.373092	0.40225
	FBgn0032524	CG9267	18.0052	24.5613	26.4261	24.5676
	FBgn0032525	Hsp60D	0	0	0	0.0940179
	FBgn0261991	CG42809	0	0	0.583084	0
	FBgn0261992	CG42810	0	0	0	0
	FBgn0023407	B4	12.706	11.8025	7.17035	10.5426
	FBgn0053640	CG33640	0	0	0	0
	FBgn0053641	CG33641	0	0	0.277096	0
	FBgn0053642	CG33642	0	0	0	0.309114
	FBgn0053643	CG33643	0	0	0	0
	FBgn0053644	CG33644	0	0	0	0
	FBgn0053645	CG33645	0	0	0	0
	FBgn0028943	CG15638	0	0	0	0
	FBgn0028942	CG16852	0	0	0	0
	FBgn0028941	CG16853	0	0.161488	0.171474	0
	FBgn0032530	CG9263	0	0	0	0
	FBgn0259984	kuz	4.28052	3.55639	3.17987	3.7061
	FBgn0262194	mir-2489	0	0	0	0
	FBgn0028513	CG9254	0	0	0	0
	FBgn0263329	CR43410	0	0	0	0
	FBgn0028546	ics	28.5566	27.2404	25.0046	24.6381
	FBgn0028527	CG18507	11.4683	8.93102	7.40847	9.02673
	FBgn0051814	CG31814	0.671802	0.619922	0	0.176555
	FBgn0028848	CG7311	0	0.06679	0	0
	FBgn0028847	CG9014	0	0	0	0
	FBgn0051813	CG31813	0	0	0	0
	FBgn0262272	mir-1002	0	0	0	0
	FBgn0262332	mir-968	0	0	0	0
	FBgn0028541	TM9SF4	23.7583	22.2955	25.0133	20.4896
	FBgn0263206	CG43376	0	2.53649	0	0
	FBgn0028540	CG9008	54.4595	49.5548	35.4877	34.9161
	FBgn0051845	CR31845	1.33022	0.614025	0.217721	0.937786
	FBgn0024846	p38b	22.6573	21.8608	17.6525	14.1968
	FBgn0028932	CG16890	17.0314	12.0383	10.969	9.22774
	FBgn0028539	CG31731	26.9312	25.3733	35.7664	23.5165
	FBgn0028931	CG16863	0.596818	0.565339	0.946712	0.47105
	FBgn0028538	sec71	19.0673	16.5713	15.4583	12.6467
	FBgn0027844	CAH1	15.5842	8.40886	6.44802	6.44353
	FBgn0028658	adat	24.3736	17.5829	11.807	13.7583
	FBgn0028919	CG16865	4.98258	4.59973	6.72412	5.9227
	FBgn0032533	CG16888	1.20129	0	1.98075	4.25979
	FBgn0001965	Sos	6.29498	4.84919	4.51784	4.84273
	FBgn0000153	b	0.663572	0.612391	1.61995	0.989398
	FBgn0004406	tam	3.50475	4.00221	4.27114	3.73058
	FBgn0001961	Sop2	66.1259	42.7165	39.0516	35.7617
	FBgn0015271	Orc5	1.33792	1.42476	1.50869	1.95132
	FBgn0004407	DNApol-gamma35	11.3822	10.2131	11.4338	10.7691
	FBgn0026373	RpII33	9.49225	12.3391	8.93104	10.2332
	FBgn0260407	mRpS23	9.82944	11.8266	9.9765	13.8943
	FBgn0028509	cenG1A	9.77122	6.85076	5.12056	5.71801
	FBgn0053307	CG33307	112.703	134.552	118.948	158.573
	FBgn0053306	CG33306	28.2731	0	0.241676	0.520385
	FBgn0028920	CG8997	187.733	1.83942	0.217404	0.468212
	FBgn0028534	CG7916	167.916	0.95569	0.406413	0.656528
	FBgn0028533	CG7953	126.136	1.40846	0.664552	0.178974
	FBgn0028532	CG7968	47.5888	4.18421	2.44846	0
	FBgn0019890	Smg5	29.3684	23.6073	32.26	29.1985
	FBgn0012037	Ance	105.759	38.384	32.6836	25.952
	FBgn0032535	Ance-2	0	0	0	0
	FBgn0025115	Acyp	0	0	0	0
	FBgn0032536	Ance-3	1.30652	1.10519	0.796454	0.400755
	FBgn0028938	CG16886	0	0.0629967	0	0.0718236
	FBgn0261628	CG42711	6.16566	3.2032	11.4299	13.1114
	FBgn0032538	CG16885	0.13285	0.122619	0.519962	0.280148
	FBgn0028544	CG16884	0.124045	0	0.121332	0.261506
	FBgn0261514	nimA	0	0	0	0.11969
	FBgn0027929	nimB1	14.2582	13.6831	18.4873	29.961
	FBgn0028543	nimB2	322.415	405.582	466.021	452.02
	FBgn0054003	nimB3	87.084	105.56	136.329	144.586
	FBgn0028542	nimB4	9.09567	10.0302	14.7858	11.8265
	FBgn0028936	nimB5	31.0385	38.2545	37.8902	35.7689
	FBgn0028430	He	0.925931	0	1.8251	0.654653
	FBgn0259896	nimC1	7.25241	4.71554	8.44983	9.54263
	FBgn0028940	Cyp28a5	34.3892	30.0487	26.1639	24.7524
	FBgn0028939	nimC2	1.06476	1.90382	1.23385	1.26024
	FBgn0003255	rk	0.234807	0.352009	0.223167	0.20063
	FBgn0261582	CG42692	0	0	0	0
	FBgn0028909	tRNA:Q:34E	0	0	0	0
	FBgn0027348	bgm	184.956	224.734	143.304	181.062
	FBgn0001967	nimC3	0	0	0.240896	0
	FBgn0028519	CG4500	0.9871	1.54161	0.370623	0.958919
	FBgn0028872	CG18095	21.3268	9.97003	14.5232	0
	FBgn0028875	nAcRalpha-34E	0.0185665	0	0.0718901	0.276966
	FBgn0260011	nimC4	1.52607	1.53662	4.34499	7.31535
	FBgn0028904	CG16879	0.149933	0	0.0731803	0
	FBgn0028526	CG15293	804.262	889.27	732.92	782.031
	FBgn0051769	CG31769	133.368	183.183	200.493	165.126
	FBgn0028906	CG17341	0	0.036754	0.0388256	0.167471
	FBgn0263037	CG43332	0	0	0	0
	FBgn0263038	CG43333	0.0371319	0	0	0.468335
	FBgn0016930	smi35A	5.17346	3.83812	4.08764	5.4867
	FBgn0261563	wb	3.99658	3.19293	5.16639	4.29758
	FBgn0052971	CG32971	0	0	0	0
	FBgn0263648	CR43639	0	0	0	0
	FBgn0263649	CR43640	0	0.084097	0	0
	FBgn0261529	ms(2)34Fe	0	0	0.032114	0
	FBgn0028916	CG33090	10.5611	9.35757	3.69076	5.69936
	FBgn0028531	CG15286	0	0	0	0
	FBgn0264253	Send2	28.7322	11.369	4.28892	0.814789
	FBgn0028530	mTTF	8.83651	12.3438	10.2765	9.94218
	FBgn0261534	l(2)34Fc	73.6411	65.9238	131.596	96.5567
	FBgn0262354	CG43052	0.718129	0.664041	0	0
	FBgn0261535	l(2)34Fd	6.66893	6.6838	6.50917	6.53453
	FBgn0015791	Rab14	57.1698	59.1862	52.6675	52.7222
	FBgn0001970	Pgant35A	0.0773466	0.0713799	0.0755111	0.0814038
	FBgn0263440	CR43463	2.99748	4.04613	6.42325	5.52182
	FBgn0015546	spel1	2.26209	1.42326	2.15594	2.97302
	FBgn0020258	ppk	0.470319	0.372022	0.590101	0.77758
	FBgn0004858	elB	5.06993	3.64382	3.04238	2.20411
	FBgn0032546	pburs	0	0	0	0
	FBgn0028871	Cpr35B	0	0	0	0
	FBgn0028844	CG15283	0	0	0	0
	FBgn0005771	noc	16.3195	11.4138	11.0597	14.5143
	FBgn0028882	tRNA:P:35Bd	0	0	0	0
	FBgn0011862	tRNA:G3:35Ba	0	0	0	0
	FBgn0011863	tRNA:G3:35Bb	0	0	0	0
	FBgn0011864	tRNA:G3:35Bc	0	0	0	0
	FBgn0053648	CG33648	0	0	0	0
	FBgn0011865	tRNA:G3:35Bd	0	0	0	0
	FBgn0011866	tRNA:G3:35Be	0	0	0	0
	FBgn0250844	CG4218	0	0	0	0
	FBgn0028913	CG3473	0	0	0	0
	FBgn0261566	CG42680	0	0	0	0
	FBgn0028912	tRNA:P:35Ba	0	0	0	0
	FBgn0028911	tRNA:P:35Bb	0	0	0	0
	FBgn0028910	tRNA:P:35Bc	0	0	0	0
	FBgn0003016	osp	6.27628	6.57448	4.71793	6.36541
	FBgn0263330	CR43411	6.49834	8.26536	8.17678	14.0226
	FBgn0000055	Adh	2906.55	2616.65	5455.73	5209.6
[truncated: 13,606 more rows]
