# Supplementary material for: PGAM5 promotes lasting FoxO activation after developmental mitochondrial stress and extends lifespan in Drosophila
Source: eLife. 2017 Sep 11;6:e26952. doi: 10.7554/eLife.26952 (PMC5614561; doi:10.7554/eLife.26952)
Supplement: Supplementary file 2. [file elife-26952-supp2.xlsx]

## Sheet: DaGS x yw
	DaGS/+
	Developmental RU486
		No RU	devRU	No RU	devRU	No RU	devRU	No RU	devRU
	Age	Nx		Lx		Dx		µx
	0	395	285	100	100	0	0	0	0
	5	379	272	96.2025	95.4386	16	13	0.00826991	0.00933742
	10	369	262	93.6642	92.2807	10	10	0.00534791	0.00749151
	15	356	245	90.3644	86.293	13	17	0.00717318	0.0134173
	20	332	230	84.7801	81.0098	24	15	0.0139592	0.0126358
	25	295	203	75.807	71.4999	37	27	0.0236319	0.0249747
	30	224	180	57.5619	63.399	71	23	0.0550659	0.0240498
	35	175	145	44.9702	51.4236	49	35	0.049372	0.0432446
	40	117	108	30.0658	38.3017	58	37	0.0805224	0.0589205
	45	70	63	17.9881	22.3427	47	45	0.102736	0.107799
	50	44	34	11.3068	12.0579	26	29	0.0928611	0.123355
	55	15	10	3.85459	3.54645	29	24	0.215228	0.244755
	60	11	6	2.8267	2.12787	4	4	0.062031	0.102165
	65	1	0	0.256973	0	10	6	0.479579	1
	70	0		0		1	0	1
	75					0
	80

## Sheet: DaGS x dOTC
	DaGS/ΔOTC
	Developmental RU486
		No RU	devRU	No RU	devRU	No RU	devRU	No RU	devRU
	Age	Nx		Lx		Dx		µx
	0	395	280	100	100	0	0	0	0
	5	386	273	98.481	97.5	9	7	0.00460968	0.00506356
	10	374	262	95.4194	93.5714	12	11	0.00631631	0.00822546
	15	361	247	92.3564	88.2143	13	15	0.00707557	0.0117912
	20	343	241	87.7514	86.0714	18	6	0.0102295	0.00491828
	25	311	216	79.5647	77.1429	32	25	0.0195875	0.0219037
	30	231	190	59.3315	68.2143	80	26	0.059475	0.0256509
	35	174	163	44.6912	58.5207	57	27	0.0566725	0.0306548
	40	111	138	28.5099	49.5451	63	25	0.089905	0.0332993
	45	55	116	14.1265	41.6466	56	22	0.140439	0.0347327
	50	29	78	7.44854	28.0038	26	38	0.128007	0.0793763
	55	14	43	3.59585	15.438	15	35	0.145648	0.119102
	60	5	33	1.28423	12.1367	9	10	0.205924	0.0529385
	65	1	21	0.256846	7.72336	4	12	0.321888	0.090397
	70	0	2	0	0.735558	1	19	1	0.470275
	75		1		0.367779	0	1		0.138629
	80		0		0		1		1

## Sheet: DaGS x dOTC, adult
	DaGS/ΔOTC
	Adult RU486
		No RU	RU	No RU	RU	No RU	RU	No RU	RU
	Age	Nx		Lx		Dx		µx
	0	207	210	100	100	0	0	0	0
	5	207	210	100	100	0	0	0	0
	10	193	200	93.6915	95.2381	14	10	0.0140057	0.00975803
	15	167	175	81.0699	83.3333	26	25	0.0289393	0.0267063
	20	151	161	73.3027	76.6667	16	14	0.0201428	0.0166763
	25	143	121	69.4191	63.8095	8	40	0.010887	0.0571228
	30	126	113	61.1665	59.5907	17	8	0.0253125	0.0136805
	35	121	109	59.7062	57.4813	5	4	0.00809827	0.00720799
	40	116	96	57.239	50.6257	5	13	0.00844007	0.0253999
	45	111	82	54.7718	43.2428	5	14	0.008812	0.0315258
	50	104	61	51.3177	32.1684	7	21	0.0130279	0.0591691
	55	83	51	40.9555	26.8949	21	10	0.0451101	0.0358096
	60	60	40	29.6064	21.0941	23	11	0.0648992	0.0485892
	65	16	26	7.89503	13.7111	44	14	0.264351	0.0861566
	70	4	5	2.4672	2.63676	12	21	0.277259	0.329732
	75	0	0	0	0	4	5	1	1
	80					0	0

## Sheet: FoxO null, DaGS x dOTC
	FoxOΔ94/21;DaGS/ΔOTC
	Developmental RU486
		No RU	devRU	No RU	devRU	No RU	devRU	No RU	devRU
	Age	Nx		Lx		Dx		µx
	0	395	280	100	100	0	0	0	0
	5	386	273	98.481	97.5	9	7	0.00460968	0.00506356
	10	374	262	95.4194	93.5714	12	11	0.00631631	0.00822546
	15	361	247	92.3564	88.2143	13	15	0.00707557	0.0117912
	20	343	241	87.7514	86.0714	18	6	0.0102295	0.00491828
	25	311	216	79.5647	77.1429	32	25	0.0195875	0.0219037
	30	231	190	59.3315	68.2143	80	26	0.059475	0.0256509
	35	174	163	44.6912	58.5207	57	27	0.0566725	0.0306548
	40	111	138	28.5099	49.5451	63	25	0.089905	0.0332993
	45	55	116	14.1265	41.6466	56	22	0.140439	0.0347327
	50	29	78	7.44854	28.0038	26	38	0.128007	0.0793763
	55	14	43	3.59585	15.438	15	35	0.145648	0.119102
	60	5	33	1.28423	12.1367	9	10	0.205924	0.0529385
	65	1	21	0.256846	7.72336	4	12	0.321888	0.090397
	70	0	2	0	0.735558	1	19	1	0.470275
	75		1		0.367779	0	1		0.138629
	80		0		0		1		1

## Sheet: PGAM5 null, DaGS x y
	PGAM51/1;DaGS/+
	Developmental RU486
		No RU	devRU	No RU	devRU	No RU	devRU	No RU	devRU
	Age	Nx		Lx		Dx		µx
	0	159	207	100	100	0	0	0	0
	5	159	207	100	100	0	0	0	0
	10	157	206	98.7421	99.5169	2	1	0.00253168	0.000968525
	15	155	202	97.4843	97.5845	2	4	0.00256414	0.00392169
	20	150	198	94.9603	95.6522	5	4	0.00655796	0.00400013
	25	144	190	91.1619	92.7486	6	8	0.0081644	0.00824859
	30	130	157	82.2989	76.6396	14	33	0.0204558	0.0381557
	35	118	134	74.7021	65.4121	12	23	0.01937	0.0316812
	40	100	97	63.3068	47.3506	18	37	0.0331029	0.0646258
	45	70	60	44.3148	29.289	30	37	0.071335	0.0960733
	50	52	33	32.9196	16.109	18	27	0.0594503	0.119567
	55	29	18	18.359	8.78671	23	15	0.11679	0.121227
	60	16	9	10.1291	4.39335	13	9	0.118941	0.138629
	65	9	1	5.69762	0.48815	7	8	0.115073	0.439445
	70	1	0	0.633069	0	8	1	0.439445	1
	75	0		0		1	0	1
	80					0

## Sheet: PGAM5 null, DaGS x dOTC
	PGAM51/1;DaGS/ΔOTC
	Developmental RU486
		No RU	devRU	No RU	devRU	No RU	devRU	No RU	devRU
	Age	Nx		Lx		Dx		µx
	0	202	161	100	100	0	0	0	0
	5	202	161	100	100	0	0	0	0
	10	201	159	100	98.7578	1	2	0.000992558	0.00250003
	15	198	155	98.5075	96.2733	3	4	0.00300758	0.00509582
	20	190	151	94.5274	94.4018	8	4	0.00824859	0.00522906
	25	182	143	90.5473	89.4004	8	8	0.00860348	0.010887
	30	160	125	79.602	78.1472	22	18	0.0257666	0.0269062
	35	149	111	74.1294	69.3947	11	14	0.0142455	0.0237567
	40	130	93	64.6766	58.1415	19	18	0.0272824	0.0353861
	45	110	64	54.7264	40.0114	20	29	0.0334108	0.0747433
	50	73	42	36.3184	26.2575	37	22	0.0820042	0.0842427
	55	46	18	22.8856	11.2532	27	24	0.0923636	0.16946
	60	28	16	13.9304	10.0028	18	2	0.0992874	0.0235566
	65	12	7	5.97015	4.37624	16	9	0.16946	0.165336
	70	2	0	0.995025	0	10	7	0.358352	1
	75	1		0.497512		1	0	0.138629
	80	0		0		1		1

## Sheet: DaGS x dOTC, HPD
	DaGS/ΔOTC
	Developmental RU486
	Adult high-protein diet
		No RU	RU	No RU	RU	No RU	RU	No RU	RU
	Age	Nx		Lx		Dx		µx
	0	199	207	100	100	0	0	0	0
	5	178	169	89.4472	81.6425	21	38	0.0223043	0.040564
	10	160	150	80.402	72.4638	18	19	0.0213219	0.0238527
	15	144	134	72.3618	64.7343	16	16	0.0210721	0.0225591
	20	124	116	62.3116	56.0386	20	18	0.0299063	0.0288499
	25	106	92	53.2663	44.4444	18	24	0.0313685	0.0463603
	30	70	77	39.8377	37.1981	36	15	0.0829888	0.0355966
	35	45	56	36.8143	29.4262	25	21	0.0883666	0.0636907
	40	31	48	25.361	25.2225	14	8	0.0745351	0.0308301
	45	21	39	17.18	20.4933	10	9	0.077893	0.0415279
	50	14	19	11.4534	9.9839	7	20	0.081093	0.143825
	55	6	13	5.6098	6.83109	8	6	0.16946	0.0758979
	60	3	7	2.8049	3.67828	3	6	0.138629	0.123808
	65	0	0	0	0	3	7	1	1
	70					0	0
	75
	80

## Sheet: DaGS x dOTC, axenic
	DaGS/ΔOTC
	Developmental RU486
	Axenic conditions
		No RU	RU	No RU	RU	No RU	RU	No RU	RU
	Age	Nx		Lx		Dx		µx
	0	143	88	100	100	0	0	0	0
	5	143	88	100	100	0	0	0	0
	10	141	88	98.6014	100	2	0	0.00281695	0
	15	141	88	98.6014	100	0	0	0	0
	20	140	88	97.9021	100	1	0	0.00142349	0
	25	133	88	93.007	100	7	0	0.0102587	0
	30	122	88	85.3147	100	11	0	0.0172656	0
	35	116	82	81.1189	93.1818	6	6	0.0100862	0.0141235
	40	111	74	77.6224	84.0909	5	8	0.008812	0.0205308
	45	100	69	69.9301	78.4091	11	5	0.020872	0.0139917
	50	82	66	57.3427	75	18	3	0.0396902	0.00889035
	55	57	61	39.8601	69.3182	25	5	0.0727336	0.0157562
	60	43	51	30.0699	57.9545	14	10	0.0563702	0.0358096
	65	30	32	20.979	36.3636	13	19	0.0720005	0.0932179
	70	20	20	13.986	22.7273	10	12	0.081093	0.0940007
	75	14	14	9.79021	15.9091	6	6	0.071335	0.071335
	80	8	12	5.59441	13.6364	6	2	0.111923	0.0308301
	85	3	5	2.0979	5.68182	5	7	0.196166	0.175094
	90	0	1	0	1.13636	3	4	1	0.321888
	95		1		1.13636	0	0		0
	100		1		1.13636		0		0
	105		1		1.13636		0		0
	110		0		0		1		1

## Sheet: DaGS x dOTC, antibiotics
	DaGS/ΔOTC
	Developmental RU486
	Adult antibiotics
		No RU	RU	No RU	RU	No RU	RU	No RU	RU
	Age	Nx		Lx		Dx		µx
	0	239	147	100	100	0	0	0	0
	5	239	147	100	100	0	0	0	0
	10	234	147	98.7448	100	5	0	0.00422849	0
	15	233	143	98.3228	97.2789	1	4	0.000856532	0.00551759
	20	232	141	97.9008	95.9184	1	2	0.000860216	0.00281695
	25	226	139	95.7909	94.5578	6	2	0.00524047	0.00285719
	30	199	137	85.1543	93.1973	27	2	0.025446	0.0028986
	35	166	133	71.0332	90.4762	33	4	0.0362634	0.00592636
	40	107	118	45.7865	80.2721	59	15	0.0878318	0.0239329
	45	82	109	35.0887	74.1497	25	9	0.0532219	0.0158673
	50	51	85	21.8235	57.8231	31	24	0.0949787	0.0497393
	55	24	48	10.6978	32.6531	27	37	0.150754	0.11429
	60	19	26	8.46907	17.6871	5	22	0.046723	0.122621
	65	4	15	1.78296	10.2041	15	11	0.311629	0.110009
	70	1	5	0.44574	3.40136	3	10	0.277259	0.219722
	75	0	0	0	0	1	5	1	1
	80					0	0
