# Supplementary figures and images for: PGAM5 promotes lasting FoxO activation after developmental mitochondrial stress and extends lifespan in Drosophila
Source: eLife journal article supplement (doi:10.7554/elife.26952), 2017-09-11

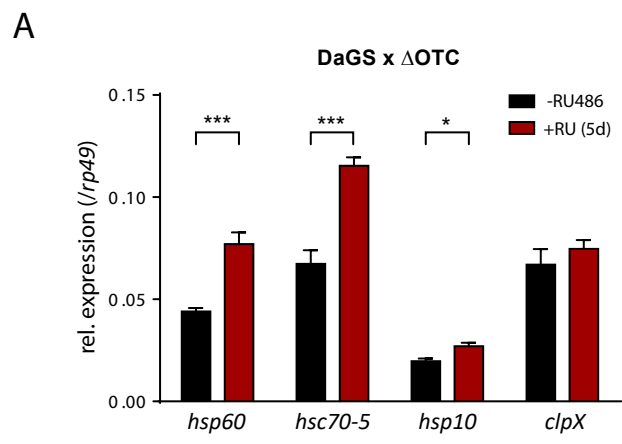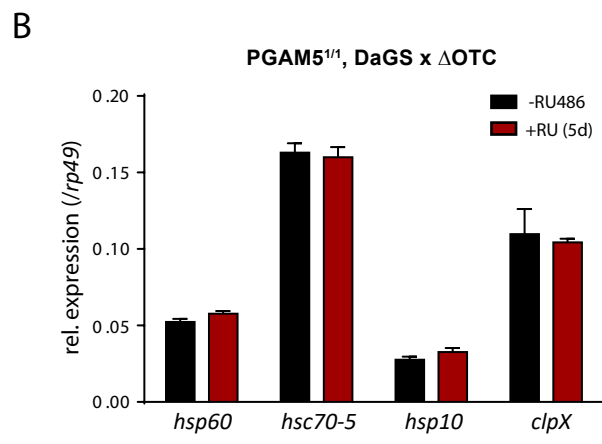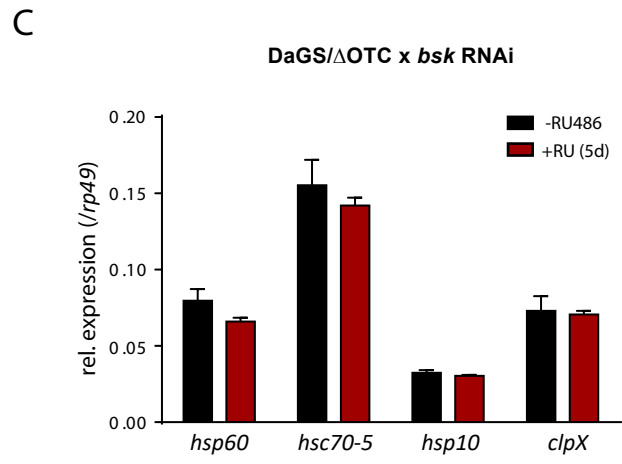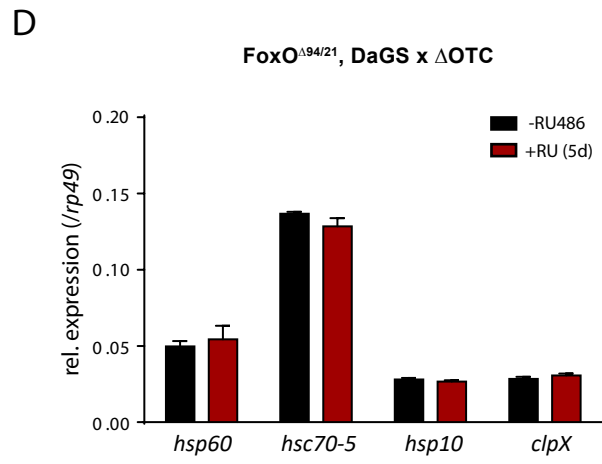

Supplement: supp [file elife_poa_e26952_Figure_1_Supplement_1.pdf › elife_poa_e26952_Figure_1_Supplement_1.pdf]

A

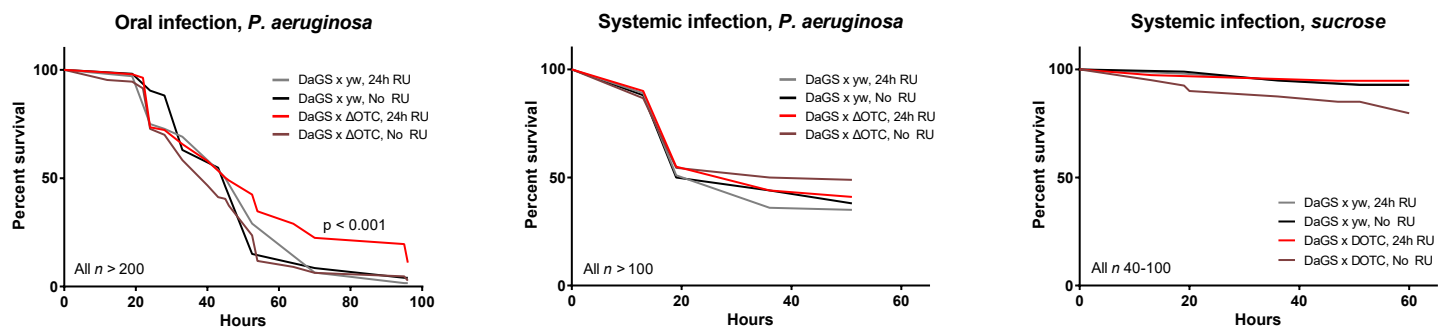

B

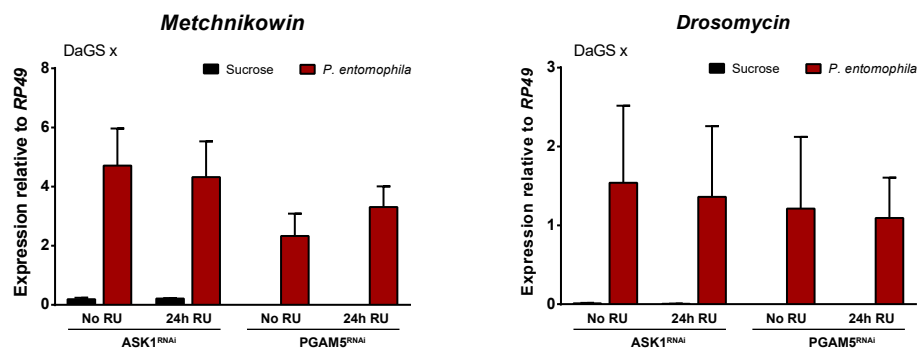

C

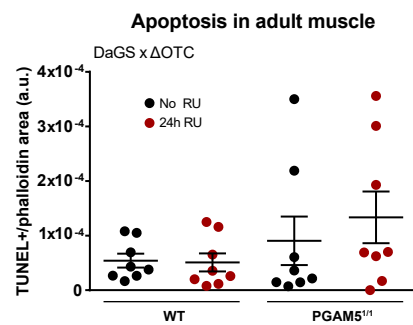

Supplement: supp [file elife_poa_e26952_Figure_1_Supplement_2.pdf › elife_poa_e26952_Figure_1_Supplement_2.pdf]

A

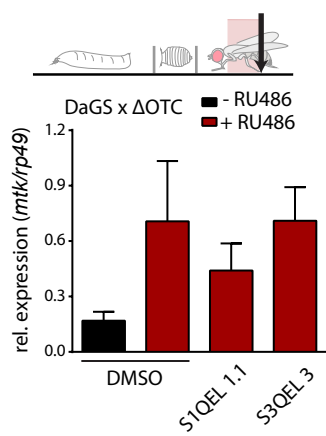

B

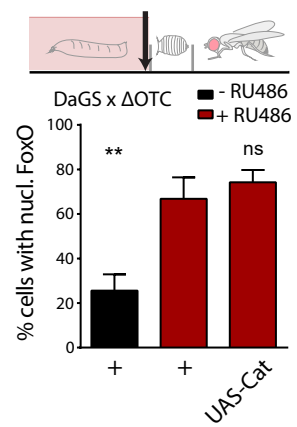

C

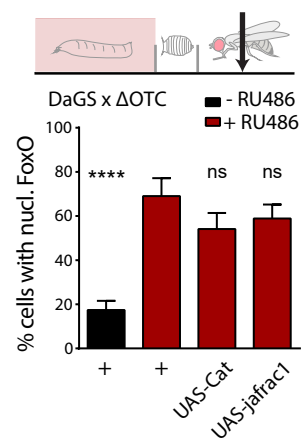

Supplement: supp [file elife_poa_e26952_Figure_1_Supplement_3.pdf › elife_poa_e26952_Figure_1_Supplement_3.pdf]

**A**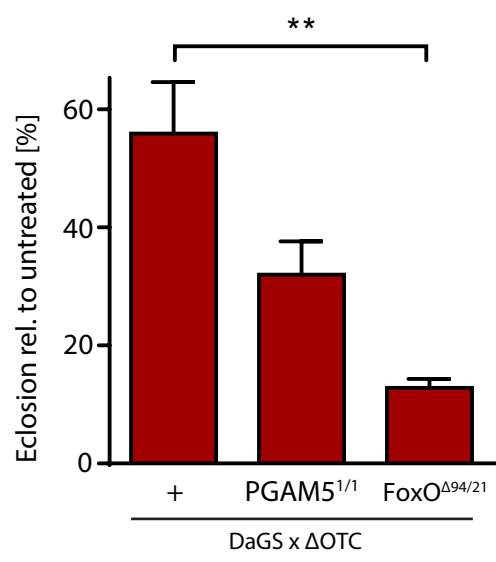

Supplement: supp [file elife_poa_e26952_Figure_2_Supplement_1.pdf › elife_poa_e26952_Figure_2_Supplement_1.pdf]

A

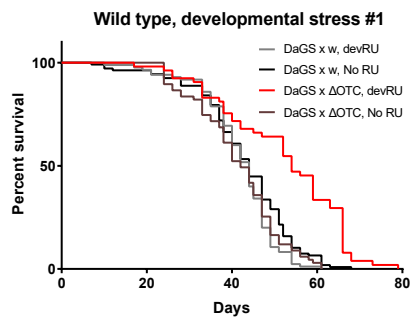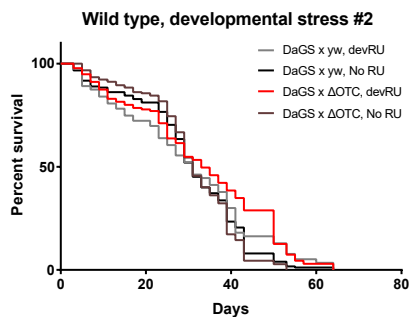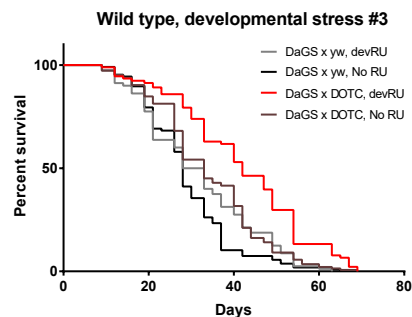

B

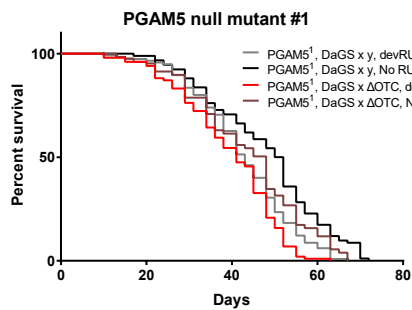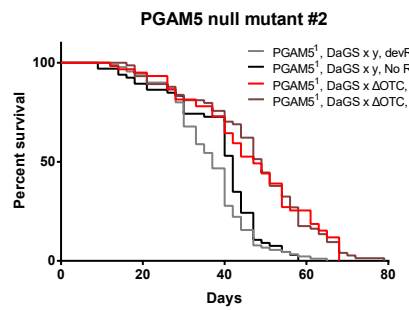

C

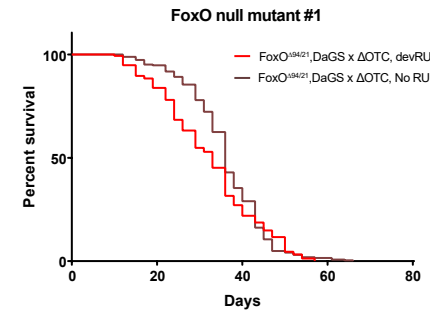

D

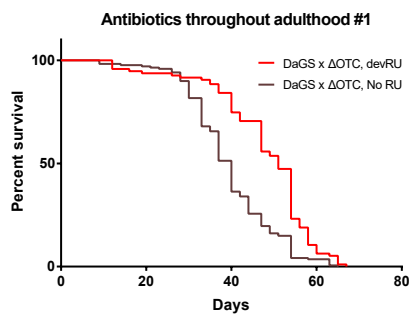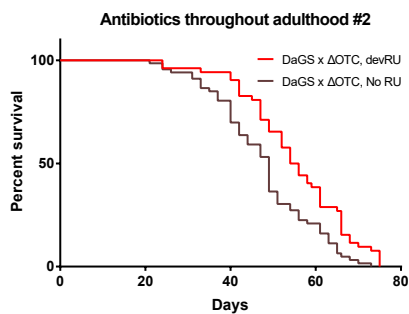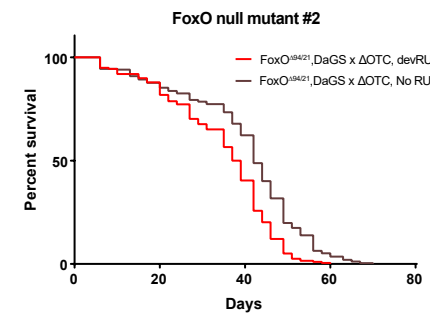

E

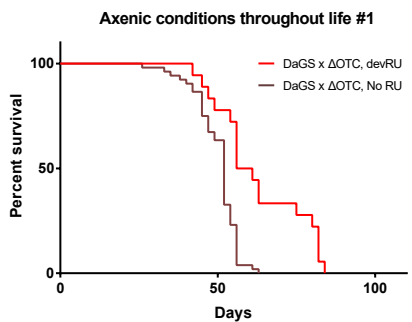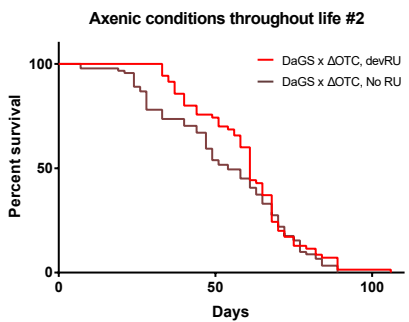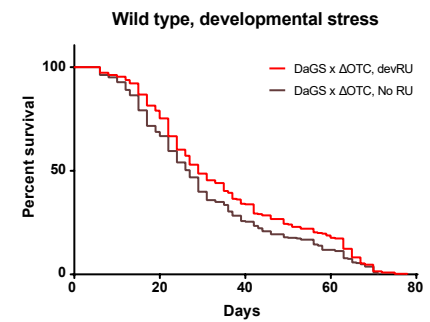

Supplement: supp [file elife_poa_e26952_Figure_2_Supplement_2.pdf › elife_poa_e26952_Figure_2_Supplement_2.pdf]

A

### Oral infection, *P. aeruginosa*

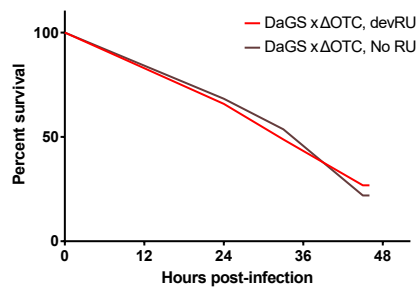

B

### Commensal bacteria counts

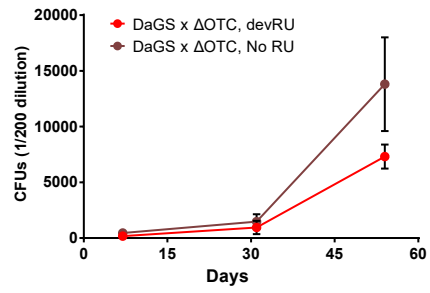

C

### Commensal bacteria types

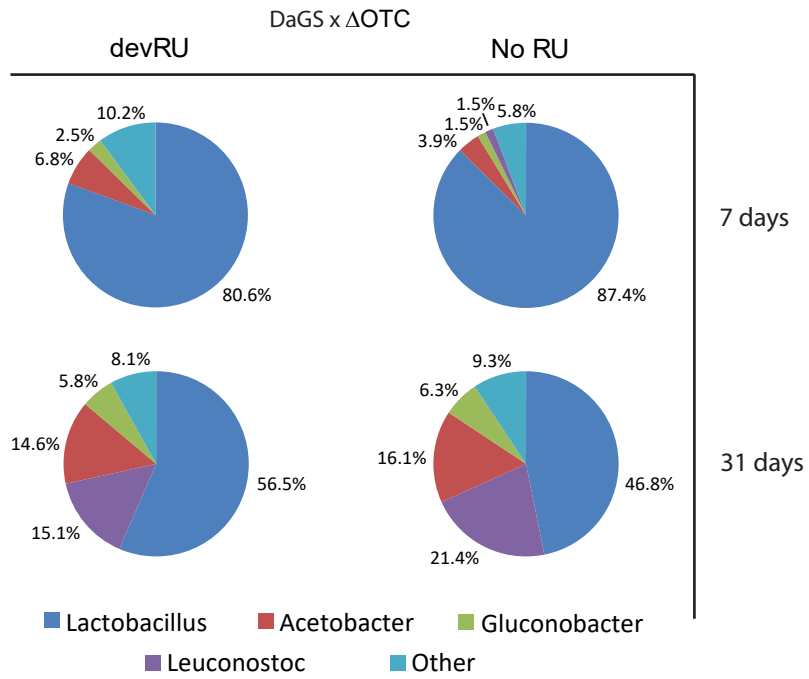

Supplement: supp [file elife_poa_e26952_Figure_2_Supplement_3.pdf › elife_poa_e26952_Figure_2_Supplement_3.pdf]

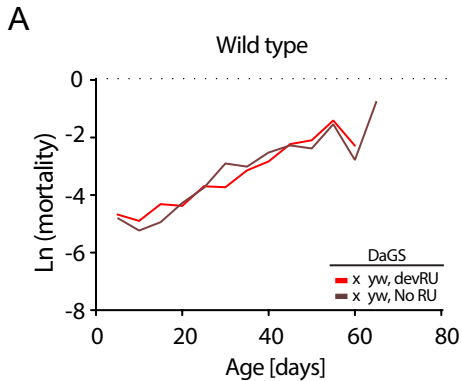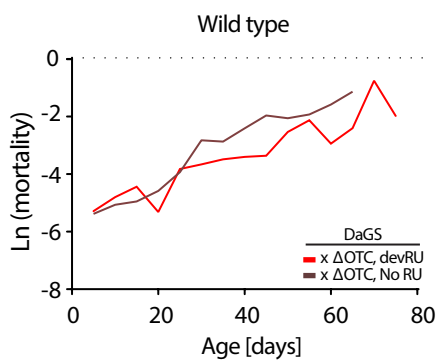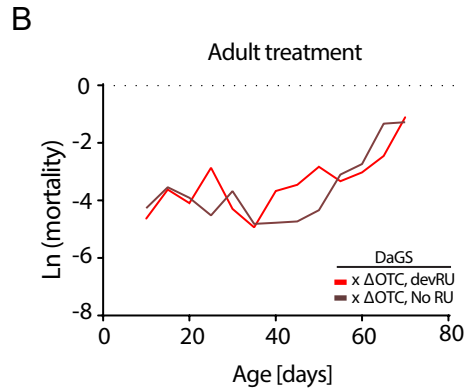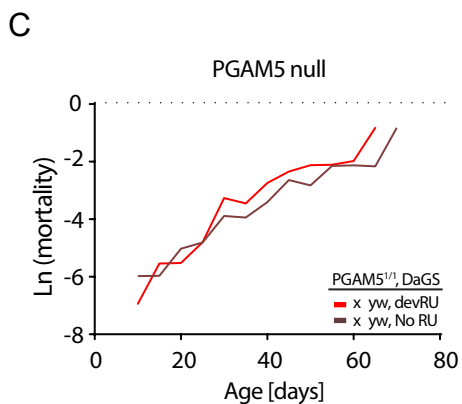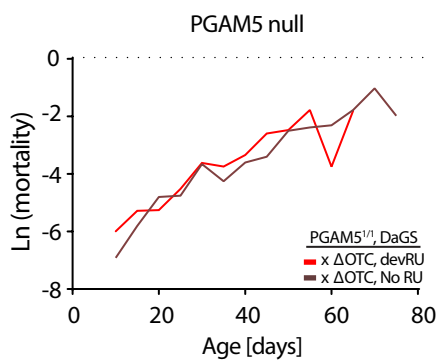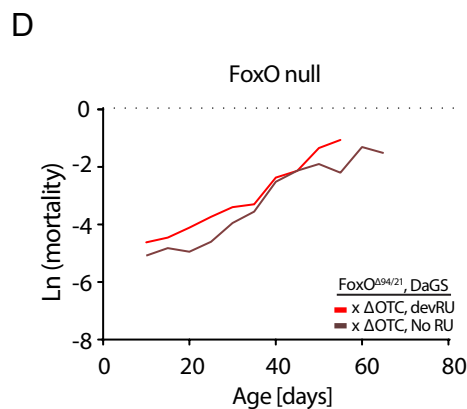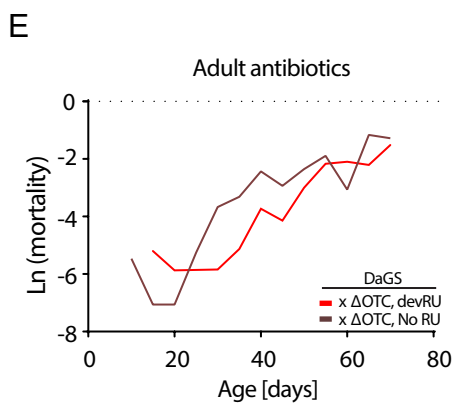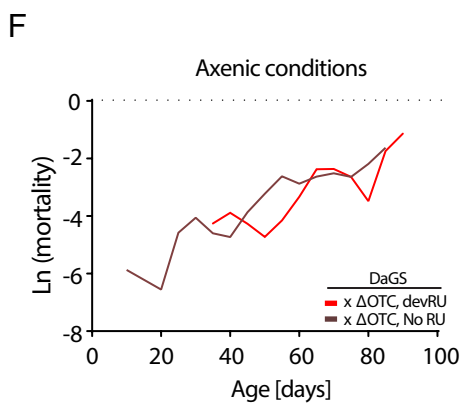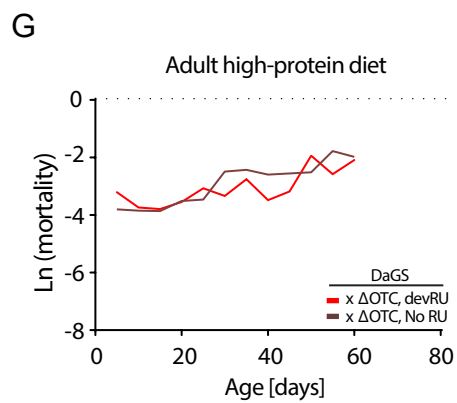

Supplement: supp [file elife_poa_e26952_Figure_2_Supplement_4.pdf › elife_poa_e26952_Figure_2_Supplement_4.pdf]

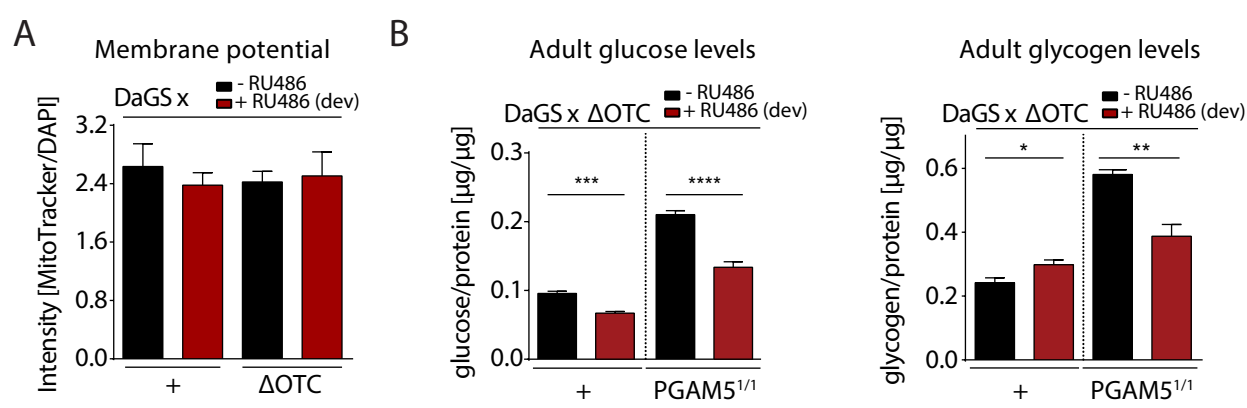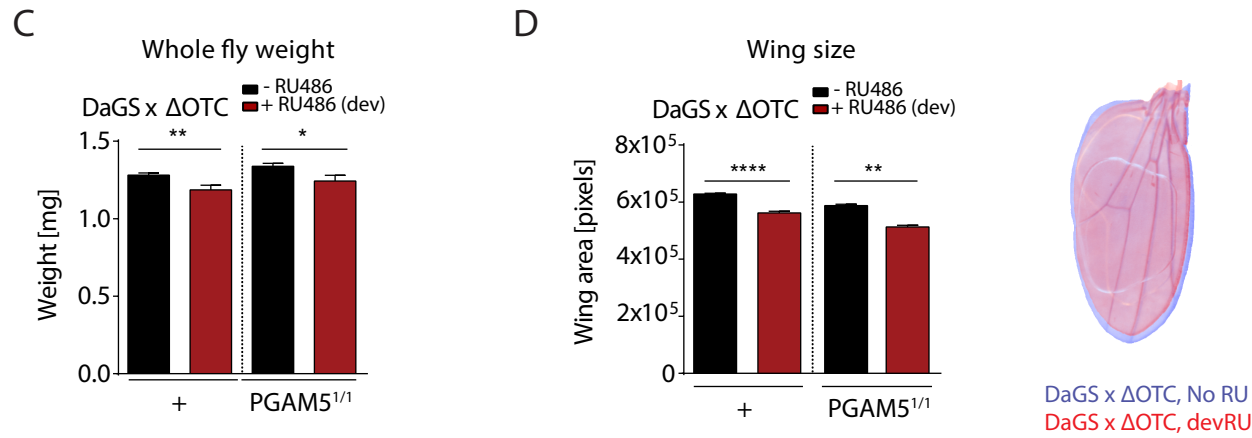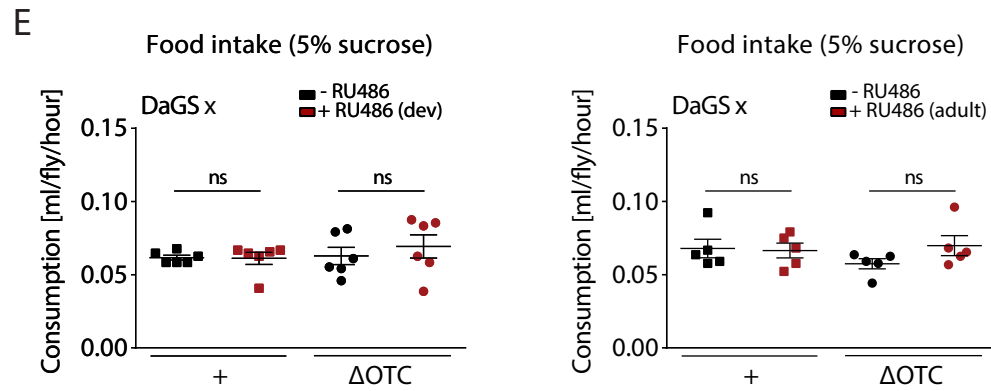

Supplement: supp [file elife_poa_e26952_Figure_3_Supplement_1.pdf › elife_poa_e26952_Figure_3_Supplement_1.pdf]

A

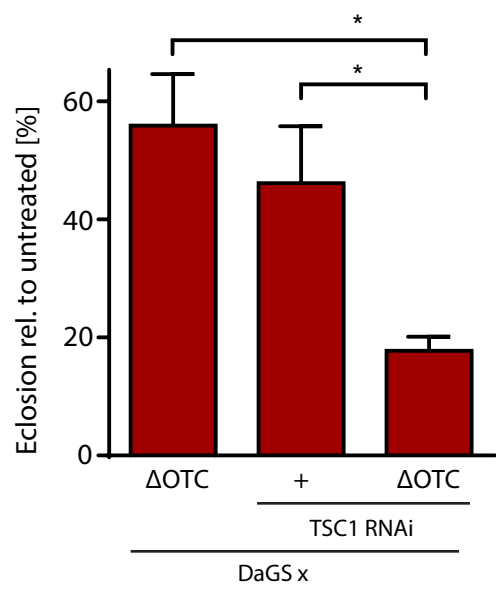

Supplement: supp [file elife_poa_e26952_Figure_5_Supplement_2.pdf › elife_poa_e26952_Figure_5_Supplement_2.pdf]
